# Supplementary material for: Functional characterisation of brassinosteroid receptor MtBRI1 in Medicago truncatula
Source: PubMed Central journal article supplement (PMC5570916; doi:10.1038/s41598-017-09297-9), 2017-08-24
Supplement: 41598_2017_9297_MOESM1_ESM.pdf [file 41598_2017_9297_MOESM1_ESM.pdf]

## Supplementary Information

**Title: Functional characterisation of brassinosteroid receptor *MtBRI1* in *Medicago truncatula***

**Xiaofei Cheng, Xiaoping Gou, Hongju Yin, Kirankumar S. Mysore, Jia Li, Jiangqi Wen**

Supplementary Table S1. Microarray results showing up- and down-regulated genes.

Supplementary Table S2. Total up- or down-regulated genes analysed by MapMan.

Supplementary Table S3. Fold changes in expression of genes related to BR metabolism and signaling in microarray analysis of *mtbri1* mutants.

Supplementary Table S4. E-box and BRRE in the promoter regions of regulated genes in *mtbri1* mutants.

Supplementary Table S5. Primers used in this study.

Supplementary Figure S1. Identification of *mtbri1* mutants.

Supplementary Figure S2. Effects of brassinazole on the elongation of hypocotyls of wildtype and *mtbri1* seedlings under light and dark conditions.

Supplementary Figure S3. Overview of functional classification of the 903 differentially expressed genes.

Supplementary Figure S4. *SAUR* gene expression patterns from the Medicago Gene Expression Atlas.

Supplementary Figure S5. qRT-PCR expression analysis of genes in BR metabolism and BR signaling pathway in *mtbri1* mutants.

Supplementary Figure S6. Full-length western blots from Figure 5. Lanes used in Figure 5 are outlined with a black rectangle.

**Supplementary Table S1.** Microarray results showing up- and down-regulated genes. Samples S1, S3, S5 are three biological replicates for *mtbri1* mutants (MT). Samples S2, S4, S6 are three biological replates for wildtype (WT). Shoots of 10-day-old WT or MT seedlings were used for total RNA isolation. Ten micrograms of purified RNA samples were used for probe labeling. Hybridisation with Affymetrix Medicago Genechip and subsequent scanning were conducted following the manufacturers' instructions.

| IMAGA3.5 Annotation  | Probesets            | S2                | S4       | S6       | S1       | S3       | S5       | Ave WT   | SD WT    | Ave MT   | SD MT    | Pts(MT/WT)  | Pta(MT/WT)  | Ratio(MT/WT) |             |
|----------------------|----------------------|-------------------|----------|----------|----------|----------|----------|----------|----------|----------|----------|-------------|-------------|--------------|-------------|
| IMGA Medtr2g045280.1 | Msa.1060.1.S1_at     | 57.76271          | 40.25523 | 25.6835  | 88.7927  | 101.960  | 184.5453 | 41.23383 | 16.06195 | 125.099  | 51.90075 | 0.05559203  | 1.51428E-1  | 3.033907221  |             |
|                      | Msa.1245.1.S1_at     | 39.04983          | 46.46942 | 39.77599 | 136.4275 | 160.9694 | 187.3533 | 41.76508 | 4.090226 | 161.5834 | 25.46844 | 0.001295651 | 0           | 3.868864345  |             |
|                      | Msa.1277.1.S1_s_at   | 52.6183           | 73.69831 | 81.89249 | 93.19954 | 358.1177 | 174.8612 | 69.40304 | 15.10237 | 208.7262 | 135.667  | 0.15182713  | 1.80164E-57 | 3.007449977  |             |
|                      | Msa.1328.1.S1_at     | 5.532806          | 5.337863 | 5.497426 | 6.867916 | 30.96503 | 11.45927 | 5.456032 | 0.103855 | 16.43074 | 12.7947  | 0.211563372 | 0           | 3.011481483  |             |
| IMGA Medtr5g030620.1 | Msa.1569.1.S1_at     | 62.14862          | 58.69036 | 69.65314 | 255.8116 | 330.3875 | 378.9616 | 63.49737 | 5.604463 | 321.7202 | 62.03084 | 0.001991873 | 0           | 5.066670154  |             |
|                      | Msa.1643.1.S1_at     | 42.85484          | 31.22597 | 27.08367 | 118.2804 | 119.3477 | 128.6609 | 33.72149 | 8.176378 | 122.0963 | 5.710085 | 0.00010512  | 0           | 3.620726683  |             |
| IMGA Medtr5g030920.1 | Msa.1669.1.S1_at     | 381.1565          | 375.2438 | 373.865  | 1095.488 | 1076.958 | 976.3015 | 376.7551 | 3.873549 | 1049.583 | 64.13595 | 5.43391E-05 | 0           | 2.785848399  |             |
|                      | Msa.1736.1.S1_at     | 579.1983          | 395.865  | 772.0085 | 1847.987 | 2264.915 | 3122.01  | 582.3573 | 188.0917 | 2411.637 | 649.5609 | 0.009410617 | 1.14144E-63 | 4.141164981  |             |
| IMGA Medtr5g097940.1 | Msa.1879.1.S1_at     | 5.805465          | 6.626965 | 6.998846 | 13.89154 | 14.22012 | 11.20775 | 6.477092 | 0.610644 | 13.10647 | 1.652526 | 0.002861056 | 7.25068E-79 | 2.023511323  |             |
|                      | Msa.1879.1.S1_s_at   | 27.89693          | 33.08316 | 50.93498 | 506.6339 | 431.8067 | 464.3881 | 37.30502 | 12.08536 | 467.6096 | 37.51747 | 4.60721E-05 | 0           | 12.53476242  |             |
| IMGA Medtr3g088460.1 | Msa.1902.1.S1_at     | 82.03165          | 81.755   | 97.38014 | 202.5316 | 236.1983 | 187.2348 | 87.0556  | 8.942388 | 208.6549 | 25.04949 | 0.00137641  | 0           | 2.396800834  |             |
|                      | Msa.2530.1.S1_at     | 10.54691          | 13.32155 | 18.15998 | 53.4155  | 41.86509 | 45.24048 | 14.00948 | 3.852875 | 46.84036 | 5.939081 | 0.001303653 | 0           | 3.343475712  |             |
|                      | Msa.2530.1.S1_s_at   | 54.80817          | 58.75935 | 77.52223 | 257.1818 | 250.3011 | 196.5316 | 63.69658 | 12.13525 | 234.6715 | 33.20878 | 0.001111414 | 0           | 3.68420884   |             |
|                      | Msa.2535.1.S1_at     | 648.767           | 470.3162 | 188.156  | 946.8577 | 879.2816 | 816.6983 | 435.7464 | 232.2432 | 880.9459 | 65.09567 | 0.032993482 | 0           | 2.021694112  |             |
|                      | Msa.2671.1.S1_s_at   | 6663.115          | 6261.448 | 6104.078 | 21615.53 | 24889.7  | 23352.07 | 6342.881 | 288.2774 | 23285.77 | 1638.091 | 6.06122E-05 | 0           | 3.671166112  |             |
|                      | Msa.2738.1.S1_at     | 119.4358          | 134.7102 | 73.93833 | 272.7216 | 405.0213 | 265.715  | 109.3614 | 31.61369 | 314.486  | 78.48412 | 0.013706768 | 2.64238E-29 | 2.875656598  |             |
|                      | Msa.2767.1.S1_at     | 148.5804          | 127.4959 | 149.0092 | 356.9504 | 402.1983 | 311.5316 | 141.6952 | 12.2988  | 356.8935 | 45.33336 | 0.001365448 | 9.3959E-202 | 2.518741326  |             |
|                      | Msa.2831.1.S1_at     | 22.80206          | 20.73347 | 32.11425 | 65.60568 | 73.75257 | 98.64703 | 25.21659 | 6.062427 | 79.33509 | 17.21355 | 0.006808974 | 6.28389E-54 | 3.146146459  |             |
| IMGA Medtr5g020800.1 | Msa.2861.1.S1_at     | 29.29486          | 9.77835  | 13.94102 | 56.08615 | 80.63034 | 118.0626 | 17.67141 | 10.27913 | 84.92638 | 31.21079 | 0.023905305 | 9.0503E-30  | 4.805862984  |             |
|                      | Msa.2901.1.S1_s_at   | 37.16211          | 35.89199 | 61.89228 | 241.5907 | 169.8393 | 156.9507 | 44.98212 | 14.65839 | 189.4602 | 45.60395 | 0.006409539 | 2.41132E-65 | 4.211900217  |             |
| IMGA Medtr2g035100.1 | Msa.2942.1.S1_s_at   | 337.5199          | 180.6281 | 281.7191 | 1750.351 | 1819.905 | 2243.666 | 266.6223 | 79.52795 | 1937.974 | 267.0112 | 0.000484428 | 0           | 7.26861028   |             |
|                      | Msa.3005.1.S1_at     | 30.38031          | 40.09646 | 26.73987 | 182.728  | 255.54   | 273.7935 | 32.40554 | 6.904765 | 237.3538 | 48.17969 | 0.001878824 | 0           | 7.324482344  |             |
|                      | Msa.3122.1.S1_at     | 5.836568          | 6.661197 | 7.297236 | 33.33134 | 34.5339  | 22.16835 | 6.598334 | 0.73236  | 30.01119 | 6.818667 | 0.004095193 | 0           | 4.548298987  |             |
|                      | Msa.3124.1.S1_at     | 693.2278          | 669.4706 | 987.143  | 1871.493 | 1471.039 | 1582.701 | 783.2805 | 176.9493 | 1641.744 | 206.653  | 0.005450949 | 4.35255E-17 | 2.095985429  |             |
|                      | Msa.3172.1.S1_at     | 47.5823           | 34.53202 | 48.55987 | 103.6175 | 112.9087 | 95.53442 | 43.55806 | 7.832047 | 104.0202 | 8.694141 | 0.000862291 | 0           | 2.388081925  |             |
|                      | Msa.886.1.S1_s_at    | 1158.479          | 1394.421 | 2195.365 | 3609.409 | 3793.406 | 4367.118 | 1582.755 | 543.4938 | 3923.311 | 395.2052 | 0.003805791 | 0           | 2.478786244  |             |
|                      | Msa.897.1.S1_s_at    | 12.48303          | 12.66205 | 20.27651 | 67.06511 | 188.8344 | 124.9297 | 15.14053 | 4.448788 | 126.9431 | 60.90963 | 0.033831334 | 0           | 8.38432329   |             |
|                      | Msa.902.1.S1_at      | 13.22113          | 9.68027  | 12.22618 | 36.88133 | 67.22599 | 41.03182 | 11.70919 | 1.826165 | 48.37971 | 16.45276 | 0.018508572 | 4.8291E-265 | 4.131771239  |             |
|                      | Msa.952.1.S1_at      | 32.163            | 53.39556 | 58.83807 | 142.6832 | 242.4483 | 149.2635 | 48.13221 | 14.09493 | 178.1317 | 55.79696 | 0.017356521 | 1.91028E-57 | 3.700882824  |             |
|                      | Msa.982.1.S1_at      | 190.4689          | 251.2686 | 279.2579 | 546.32   | 806.571  | 638.6854 | 240.3318 | 45.39364 | 663.8588 | 131.9391 | 0.006265338 | 9.62479E-59 | 2.762259346  |             |
|                      | IMGA Medtr6g036450.1 | Mtr.10096.1.S1_at | 7.00715  | 7.22317  | 7.140877 | 28.46996 | 43.40126 | 35.18224 | 7.123732 | 0.109026 | 35.68449 | 7.478311    | 0.002708851 | 0            | 5.009240007 |
|                      |                      | Mtr.10146.1.S1_at | 17.35882 | 20.8871  | 23.36454 | 41.74367 | 42.21428 | 46.56759 | 20.53682 | 3.018145 | 43.50851 | 2.659667    | 0.000586441 | 0            | 2.118561626 |
|                      |                      | Mtr.1025.1.S1_at  | 6.147004 | 9.126064 | 8.155046 | 74.03116 | 57.08686 | 97.00771 | 7.809371 | 1.519315 | 76.04191 | 20.03624    | 0.00417642  | 0            | 9.737264041 |
|                      | IMGA Medtr5g029190.1 | Mtr.10253.1.S1_at | 13.70826 | 16.35563 | 13.44251 | 26.46532 | 30.02507 | 37.02266 | 14.50213 | 1.610663 | 31.17102 | 5.37115     | 0.006750291 | 7.53636E-72  | 2.14940898  |
| Mtr.10272.1.S1_at    |                      | 31.74475          | 32.71999 | 32.96428 | 149.1398 | 113.8621 | 125.4466 | 32.47634 | 0.645244 | 129.4828 | 17.98186 | 0.000732263 | 0           | 3.986988711  |             |
| IMGA Medtr8g077290.1 | Mtr.10283.1.S1_at    | 22.21201          | 18.64213 | 28.6663  | 45.5425  | 55.88657 | 69.08103 | 23.17348 | 5.08078  | 56.8367  | 11.798   | 0.010504696 | 1.74431E-30 | 2.452661297  |             |
|                      | Mtr.10302.1.S1_x_at  | 5.828572          | 6.147004 | 7.606522 | 23.87658 | 66.53165 | 41.37001 | 6.527366 | 0.948042 | 43.92608 | 21.4421  | 0.039238534 | 0           | 6.729526121  |             |
|                      | Mtr.10308.1.S1_at    | 83.02882          | 102.8836 | 55.49517 | 216.9738 | 426.9091 | 292.6872 | 80.46919 | 23.79767 | 312.19   | 106.3178 | 0.021132105 | 8.11404E-64 | 3.879621952  |             |
| IMGA Medtr2g035190.1 | Mtr.10311.1.S1_at    | 617.5316          | 649.701  | 662.2227 | 2292.098 | 2136.556 | 1949.365 | 643.1518 | 23.05411 | 2126.006 | 171.6097 | 0.000120274 | 0           | 3.305605784  |             |
| IMGA Medtr2g035220.1 | Mtr.10317.1.S1_at    | 69.89532          | 82.19831 | 52.4874  | 403.6983 | 405.6655 | 380.3251 | 68.19368 | 14.92837 | 396.563  | 14.09675 | 1.01028E-05 | 0           | 5.815245704  |             |
| IMGA Medtr2g035210.1 | Mtr.10319.1.S1_at    | 273.3281          | 153.865  | 220.74   | 3271.923 | 3536.11  | 2813.215 | 215.9777 | 59.87376 | 3207.083 | 365.7833 | 0.000151973 | 0           | 14.84914099  |             |
| IMGA Medtr8g074330.1 | Mtr.10332.1.S1_at    | 95.51574          | 77.68012 | 63.97691 | 209.2636 | 126.1092 | 646.7162 | 79.05759 | 15.81447 | 327.363  | 279.6757 | 0.19950161  | 7.4051E-163 | 4.140816742  |             |
| IMGA Medtr2g029750.1 | Mtr.10356.1.S1_at    | 78.84449          | 108.702  | 60.61201 | 434.7107 | 481.565  | 561.9033 | 82.71949 | 24.27803 | 492.7264 | 64.32664 | 0.000495809 | 0           | 5.956593052  |             |
| IMGA Medtr8g045490.1 | Mtr.10361.1.S1_at    | 6.21158           | 6.037514 | 7.072166 | 26.12327 | 17.26252 | 20.45616 | 6.44042  | 0.553987 | 21.28065 | 4.487545 | 0.004727645 | 0           | 3.304233109  |             |

|                      |                     |          |          |          |          |          |          |          |          |          |          |             |             |             |
|----------------------|---------------------|----------|----------|----------|----------|----------|----------|----------|----------|----------|----------|-------------|-------------|-------------|
|                      | Mtr.10368.1.S1_at   | 106.2865 | 98.24891 | 91.69831 | 713.7018 | 314.5129 | 265.0316 | 98.74457 | 7.306705 | 431.0821 | 246.0031 | 0.079475648 | 0           | 4.365628729 |
|                      | Mtr.10382.1.S1_at   | 10.76431 | 9.941019 | 9.714197 | 10.49459 | 79.03165 | 11.75492 | 10.13984 | 0.552568 | 33.76039 | 39.21113 | 0.355722193 | 0           | 3.329478649 |
| IMGA Medtr2g035100.1 | Mtr.10391.1.S1_at   | 7.069996 | 5.569564 | 6.19899  | 25.51238 | 22.6444  | 31.80257 | 6.279517 | 0.75345  | 26.65312 | 4.684438 | 0.001745192 | 0           | 4.244453368 |
|                      | Mtr.10434.1.S1_at   | 11.77107 | 9.471738 | 10.18506 | 97.10706 | 157.9427 | 255.3056 | 10.47595 | 1.176943 | 170.1185 | 79.79902 | 0.025707639 | 0           | 16.23894589 |
|                      | Mtr.10435.1.S1_s_at | 4.817929 | 7.536633 | 5.753596 | 14.69557 | 14.55345 | 21.24035 | 6.036053 | 1.381186 | 16.82979 | 3.820316 | 0.010014901 | 9.65784E-42 | 2.788211037 |
|                      | Mtr.10462.1.S1_at   | 18.0112  | 12.97775 | 16.99932 | 116.6565 | 366.4755 | 99.84376 | 15.99609 | 2.662475 | 194.3253 | 149.3233 | 0.107452591 | 0           | 12.14829723 |
|                      | Mtr.10466.1.S1_at   | 36.69929 | 66.47832 | 110.1489 | 346.7826 | 250.9243 | 195.3734 | 71.10883 | 36.94309 | 264.3601 | 76.5936  | 0.01701464  | 1.29916E-19 | 3.717682491 |
| IMGA Medtr3g088110.1 | Mtr.10488.1.S1_at   | 549.5941 | 574.4854 | 561.7531 | 1021.634 | 1170.301 | 1331.399 | 561.9442 | 12.44675 | 1174.444 | 154.9243 | 0.002408956 | 0           | 2.089966274 |
|                      | Mtr.10502.1.S1_s_at | 6.858476 | 9.310968 | 6.672904 | 40.68436 | 24.23186 | 20.24559 | 7.614116 | 1.472443 | 28.38727 | 10.8345  | 0.030197448 | 7.2095E-132 | 3.728242079 |
| IMGA Medtr4g122480.1 | Mtr.10517.1.S1_at   | 265.4756 | 269.2553 | 361.8958 | 758.5063 | 805.0629 | 647.9593 | 298.8756 | 54.6098  | 737.1761 | 80.69458 | 0.001463708 | 0           | 2.46649852  |
| IMGA Medtr8g012550.1 | Mtr.10572.1.S1_at   | 22.13736 | 22.80882 | 27.04205 | 57.6208  | 100.6432 | 263.865  | 23.99607 | 2.65917  | 140.7097 | 108.8033 | 0.13680833  | 0           | 5.863862325 |
|                      | Mtr.10592.1.S1_at   | 155.584  | 194.6327 | 277.691  | 1096.91  | 855.9642 | 886.5099 | 209.3026 | 62.36132 | 946.4613 | 131.1842 | 0.000923815 | 0           | 4.521976767 |
| IMGA Medtr1g079810.1 | Mtr.10683.1.S1_at   | 273.7863 | 334.865  | 338.0311 | 703.3747 | 906.1635 | 1127.463 | 315.5608 | 36.2124  | 912.3338 | 212.1116 | 0.008625469 | 3.3489E-179 | 2.891150767 |
| IMGA Medtr8g027180.1 | Mtr.10700.1.S1_at   | 90.84837 | 137.2498 | 124.3425 | 227.8356 | 201.6143 | 295.1144 | 117.4802 | 23.94976 | 241.5215 | 48.22908 | 0.016267159 | 2.94687E-19 | 2.055847678 |
|                      | Mtr.10743.1.S1_at   | 27.25805 | 13.54983 | 19.22512 | 68.93565 | 66.36812 | 84.3016  | 20.011   | 6.887819 | 73.20179 | 9.69806  | 0.001497111 | 0           | 3.658077591 |
| IMGA Medtr3g101900.1 | Mtr.10760.1.S1_at   | 26.11349 | 31.30271 | 33.66601 | 144.9892 | 139.1983 | 149.3485 | 30.36074 | 3.863369 | 144.512  | 5.091874 | 6.50744E-06 | 0           | 4.759831365 |
| IMGA Medtr5g005170.2 | Mtr.10838.1.S1_at   | 364.1588 | 487.2638 | 454.3804 | 942.0454 | 990.2918 | 962.5316 | 435.2677 | 63.7392  | 964.9563 | 24.21441 | 0.000176492 | 0           | 2.216926126 |
| IMGA Medtr4g082600.1 | Mtr.10898.1.S1_at   | 42.67728 | 30.30891 | 38.23911 | 105.2531 | 82.19831 | 79.75746 | 37.0751  | 6.265803 | 89.06963 | 14.06835 | 0.004265509 | 7.66742E-47 | 2.402411166 |
|                      | Mtr.10941.1.S1_at   | 48.23314 | 75.107   | 134.1624 | 271.7806 | 303.364  | 631.8112 | 85.83417 | 43.9575  | 402.3186 | 199.3728 | 0.054944018 | 1.08294E-35 | 4.687162049 |
| IMGA Medtr5g021060.1 | Mtr.10969.1.S1_at   | 32.77055 | 69.9161  | 18.86448 | 97.71687 | 125.0316 | 117.3113 | 40.51704 | 26.39267 | 113.6866 | 13.52666 | 0.012916307 | 0           | 2.805896242 |
| IMGA Medtr7g065260.2 | Mtr.11080.1.S1_s_at | 30.206   | 27.56827 | 26.23883 | 78.08316 | 85.45518 | 90.79904 | 28.00437 | 2.019218 | 84.77913 | 6.384841 | 0.000125134 | 0           | 3.027353877 |
| IMGA Medtr7g114020.1 | Mtr.11120.1.S1_at   | 22.35509 | 28.12631 | 17.02424 | 46.01694 | 50.10124 | 47.01166 | 22.50188 | 5.552492 | 47.70994 | 2.129807 | 0.001832472 | 0           | 2.120264794 |
| IMGA Medtr4g061610.1 | Mtr.11257.1.S1_at   | 8.755139 | 7.72646  | 5.39893  | 13.36129 | 15.29109 | 19.94683 | 7.29351  | 1.719482 | 16.19974 | 3.385493 | 0.015316477 | 2.93229E-19 | 2.221116546 |
| IMGA Medtr7g037040.1 | Mtr.11264.1.S1_at   | 72.12523 | 79.05986 | 83.10453 | 170.865  | 151.0766 | 168.4009 | 78.09654 | 5.552676 | 163.4475 | 10.7841  | 0.000260152 | 0           | 2.092890171 |
| IMGA Medtr3g069050.1 | Mtr.11267.1.S1_at   | 8.828637 | 11.23276 | 10.25998 | 24.83673 | 29.55141 | 38.47721 | 10.10712 | 1.209328 | 30.95512 | 6.927732 | 0.006816231 | 6.7638E-196 | 3.062702699 |
| IMGA Medtr2g084010.1 | Mtr.11354.1.S1_at   | 45.66791 | 55.50314 | 81.25988 | 365.0777 | 257.8723 | 565.6359 | 60.81031 | 18.37993 | 486.1953 | 106.5768 | 0.002426304 | 0           | 7.995277725 |
|                      | Mtr.11532.1.S1_at   | 9.424871 | 6.801641 | 7.338471 | 19.4024  | 25.19065 | 39.43831 | 7.854994 | 1.385796 | 28.01045 | 10.3113  | 0.028424211 | 5.0184E-140 | 3.565941507 |
| IMGA Medtr7g111240.1 | Mtr.1156.1.S1_at    | 283.1809 | 245.5275 | 282.3954 | 996.9524 | 1022.212 | 1259.696 | 270.3679 | 21.51604 | 1092.954 | 144.9546 | 0.000626637 | 0           | 4.042467529 |
|                      | Mtr.11654.1.S1_at   | 26.10356 | 27.57364 | 32.64572 | 62.55713 | 62.2188  | 51.41324 | 28.77431 | 3.43237  | 58.72972 | 6.338515 | 0.001974229 | 1.26775E-51 | 2.041047289 |
|                      | Mtr.11689.1.S1_at   | 33.21607 | 20.23205 | 44.41082 | 150.0494 | 176.1527 | 125.0316 | 32.61964 | 12.10042 | 150.4113 | 25.56247 | 0.001957918 | 8.7606E-64  | 4.611063901 |
| IMGA Medtr4g094240.1 | Mtr.11811.1.S1_s_at | 999.0316 | 809.9558 | 102.532  | 2241.556 | 2069.655 | 2434.071 | 940.5064 | 113.2614 | 2248.427 | 182.3054 | 0.000455768 | 0           | 2.390656301 |
| IMGA Medtr2g084080.1 | Mtr.12006.1.S1_at   | 10.89957 | 22.48727 | 14.78698 | 50.24557 | 313.6665 | 181.2857 | 16.05794 | 5.897471 | 181.7326 | 131.711  | 0.095115478 | 0           | 11.31730467 |
| IMGA Medtr2g084080.1 | Mtr.12025.1.S1_at   | 10.43691 | 8.517623 | 8.171712 | 25.92695 | 146.72   | 91.90172 | 9.042081 | 1.220274 | 88.1829  | 60.48235 | 0.08611518  | 0           | 9.752500365 |
| IMGA Medtr8g106150.1 | Mtr.12088.1.S1_at   | 399.4377 | 494.1191 | 534.5189 | 950.4093 | 1006.84  | 940.1156 | 476.0253 | 69.33452 | 965.7883 | 35.92255 | 0.000407524 | 0           | 2.028859388 |
| IMGA Medtr8g103250.1 | Mtr.12141.1.S1_at   | 21.20955 | 20.46242 | 28.00017 | 106.4947 | 101.128  | 290.5719 | 23.22405 | 4.153078 | 166.0649 | 107.8597 | 0.083663967 | 0           | 7.150557979 |
| IMGA Medtr2g098540.2 | Mtr.12161.1.S1_at   | 7.078533 | 9.334525 | 8.821642 | 13.97928 | 24.88422 | 26.80883 | 8.411567 | 1.18258  | 21.89078 | 6.918804 | 0.029210515 | 9.45564E-87 | 2.602461373 |
|                      | Mtr.12193.1.S1_at   | 6.48975  | 5.36137  | 6.606853 | 21.84452 | 14.91763 | 12.39792 | 6.152658 | 0.687772 | 16.38669 | 4.891645 | 0.022994473 | 1.8693E-146 | 2.663351767 |
|                      | Mtr.12246.1.S1_at   | 7.240464 | 10.58614 | 7.952506 | 170.2174 | 521.2115 | 310.7464 | 8.593038 | 1.762414 | 334.0584 | 176.6545 | 0.033186295 | 0           | 38.87547241 |
| IMGA Medtr1g106870.1 | Mtr.12311.1.S1_at   | 8.881766 | 10.63183 | 9.943245 | 86.59911 | 183.6983 | 170.784  | 9.818948 | 0.88163  | 147.0271 | 52.72907 | 0.010769656 | 0           | 14.97381661 |
|                      | Mtr.12423.1.S1_at   | 87.36441 | 109.9057 | 85.91643 | 348.2481 | 269.9701 | 320.8221 | 94.39552 | 13.45173 | 313.0134 | 39.71892 | 0.00083324  | 0           | 3.315977441 |
| IMGA Medtr7g093850.1 | Mtr.12424.1.S1_at   | 97.84434 | 200.862  | 266.0111 | 449.3065 | 368.7249 | 343.1647 | 188.2392 | 84.79105 | 387.0654 | 55.39675 | 0.027273946 | 5.0818E-10  | 2.056242412 |
| IMGA Medtr4g100380.1 | Mtr.12456.1.S1_at   | 227.0379 | 368.7752 | 385.0851 | 604.2137 | 691.0799 | 749.9314 | 326.9661 | 86.92371 | 681.7417 | 73.3063  | 0.005676718 | 0           | 2.085053448 |
|                      | Mtr.12474.1.S1_at   | 5.076418 | 7.919811 | 5.876794 | 20.10334 | 36.19537 | 44.7082  | 6.291008 | 1.466254 | 33.66897 | 12.49547 | 0.019619439 | 1.8901E-229 | 5.351920145 |
|                      | Mtr.12486.1.S1_at   | 29.3112  | 33.3343  | 27.64597 | 169.255  | 362.5316 | 195.2241 | 30.09716 | 2.924479 | 242.3369 | 104.8984 | 0.024826912 | 0           | 8.051820454 |
|                      | Mtr.12502.1.S1_at   | 137.7681 | 142.8438 | 230.6531 | 376.6983 | 515.865  | 501.7708 | 170.4217 | 52.22366 | 464.778  | 76.60411 | 0.005330972 | 1.62879E-22 | 2.727223739 |
| IMGA Medtr5g090920.1 | Mtr.12513.1.S1_at   | 11.6676  | 20.60827 | 18.89251 | 61.58197 | 96.44181 | 77.14666 | 17.05613 | 4.744797 | 78.39014 | 17.46316 | 0.004205249 | 4.9851E-111 | 4.596010935 |
| IMGA Medtr7g005280.1 | Mtr.12514.1.S1_at   | 420.8405 | 433.9953 | 593.6983 | 1128.782 | 959.2816 | 1067.293 | 482.8447 | 96.22712 | 1051.786 | 85.80753 | 0.001574105 | 0           | 2.178310369 |
| IMGA Medtr1g099310.1 | Mtr.12525.1.S1_at   | 75.7384  | 73.1747  | 70.93327 | 389.5185 | 136.5029 | 188.9667 | 73.28212 | 2.404363 | 238.3294 | 133.5355 | 0.099039528 | 0           | 3.252216865 |
| IMGA Medtr2g011080.1 | Mtr.12528.1.S1_at   | 12.33336 | 10.93941 | 12.36594 | 29.57135 | 25.49025 | 24.17864 | 11.87957 | 0.814363 | 26.47342 | 2.913544 | 0.001121712 | 0           | 2.228482681 |
|                      | Mtr.12566.1.S1_at   | 5.285027 | 5.748574 | 5.836942 | 61.75386 | 7.082153 | 10.77641 | 5.623514 | 0.29645  | 26.53747 | 30.55417 | 0.301429335 | 0           | 4.719019417 |

|                      |                     |          |          |          |          |          |          |          |          |          |          |             |             |             |
|----------------------|---------------------|----------|----------|----------|----------|----------|----------|----------|----------|----------|----------|-------------|-------------|-------------|
|                      | Mtr.12569.1.S1_at   | 83.49227 | 94.00783 | 51.69831 | 491.1019 | 775.525  | 1035.865 | 76.39947 | 22.0285  | 767.4973 | 272.4702 | 0.011884991 | 0           | 10.04584559 |
| IMGA Medtr1g018640.1 | Mtr.12626.1.S1_at   | 2964.508 | 2208.152 | 3774.947 | 7355.597 | 5859.741 | 6927.263 | 2982.536 | 783.5534 | 6714.2   | 770.3523 | 0.004174773 | 0           | 2.25117194  |
| IMGA Medtr4g126970.1 | Mtr.12664.1.S1_at   | 13.22113 | 13.24716 | 15.0342  | 60.4568  | 30.37514 | 36.44038 | 13.83416 | 1.039345 | 42.42411 | 15.9085  | 0.036006508 | 0           | 3.06661902  |
|                      | Mtr.12668.1.S1_at   | 137.9262 | 144.365  | 124.1983 | 342.3196 | 262.3233 | 350.0138 | 135.4965 | 10.30055 | 318.2189 | 48.55963 | 0.003104565 | 2.6383E-207 | 2.348539516 |
|                      | Mtr.12685.1.S1_at   | 26.2383  | 27.75687 | 32.28442 | 63.81564 | 50.69832 | 60.23415 | 28.75986 | 3.145377 | 58.24937 | 6.780158 | 0.002398367 | 2.68109E-59 | 2.025370185 |
|                      | Mtr.12696.1.S1_at   | 9.8359   | 8.843747 | 5.694105 | 16.9408  | 20.85228 | 30.48935 | 8.124584 | 2.162525 | 22.76081 | 6.972997 | 0.02552787  | 9.75762E-32 | 2.801473815 |
| IMGA Medtr8g091390.1 | Mtr.12710.1.S1_at   | 57.60323 | 59.46605 | 74.52595 | 216.9301 | 172.4594 | 243.7755 | 63.86508 | 9.27945  | 211.055  | 36.01924 | 0.002371939 | 3.6258E-166 | 3.304701474 |
|                      | Mtr.12748.1.S1_at   | 11.00271 | 13.02511 | 12.49683 | 20.86728 | 74.40402 | 85.03144 | 12.17488 | 1.048933 | 60.10091 | 34.39032 | 0.073344202 | 0           | 4.936467098 |
| IMGA AC158498_5.1    | Mtr.12925.1.S1_at   | 21.63082 | 17.25539 | 15.069   | 51.55101 | 41.41699 | 63.87802 | 17.98507 | 3.341208 | 52.282   | 11.24834 | 0.007167888 | 1.02511E-70 | 2.906966927 |
|                      | Mtr.13033.1.S1_at   | 542.7295 | 378.5206 | 142.8922 | 932.9683 | 827.7067 | 726.476  | 354.7141 | 200.9789 | 829.0503 | 103.2527 | 0.022040923 | 1.77636E-15 | 2.337235323 |
|                      | Mtr.13058.1.S1_at   | 41.60201 | 38.69873 | 47.60101 | 159.4787 | 137.6816 | 181.742  | 42.63392 | 4.539961 | 159.6341 | 22.03059 | 0.000840499 | 0           | 3.744298639 |
|                      | Mtr.13186.1.S1_at   | 16.80994 | 11.50916 | 17.23431 | 36.63725 | 38.02428 | 36.11734 | 15.18447 | 3.189976 | 36.92629 | 0.985779 | 0.000352106 | 0           | 2.431845491 |
| IMGA Medtr6g081810.1 | Mtr.13237.1.S1_at   | 52.86498 | 50.16306 | 46.19833 | 113.547  | 122.3194 | 101.5394 | 49.74212 | 3.3532   | 112.4686 | 10.43192 | 0.000580865 | 0           | 2.261033503 |
| IMGA Medtr8g095790.1 | Mtr.13471.1.S1_at   | 8.658785 | 9.192508 | 7.620994 | 17.96815 | 19.32686 | 26.2383  | 8.490762 | 0.799117 | 21.17777 | 4.434889 | 0.008181863 | 1.8997E-166 | 2.494212671 |
| IMGA Medtr5g016440.1 | Mtr.13532.1.S1_at   | 11.36088 | 11.6107  | 13.6995  | 80.77754 | 38.16917 | 25.91012 | 12.22369 | 1.284176 | 48.28561 | 28.7987  | 0.096161306 | 0           | 3.950164686 |
| IMGA Medtr3g033810.1 | Mtr.13584.1.S1_at   | 8.672115 | 8.839309 | 8.391123 | 36.07872 | 34.77371 | 57.15473 | 8.634182 | 0.226488 | 42.66905 | 12.56193 | 0.009363833 | 0           | 4.941875175 |
|                      | Mtr.13989.1.S1_at   | 7.92433  | 21.4371  | 30.28533 | 178.5838 | 107.6322 | 275.0501 | 19.88225 | 11.26129 | 187.0887 | 84.0324  | 0.026881879 | 7.4889E-146 | 9.409832758 |
| IMGA Medtr8g038210.1 | Mtr.14183.1.S1_at   | 29.0649  | 33.8862  | 15.62    | 62.3651  | 82.81686 | 80.95423 | 26.19036 | 9.466295 | 75.37873 | 11.30855 | 0.004458843 | 2.25704E-19 | 2.878109257 |
| IMGA Medtr8g079550.1 | Mtr.14263.1.S1_at   | 65.69831 | 74.4575  | 101.1127 | 181.1547 | 125.4082 | 178.7934 | 80.42284 | 18.44543 | 161.7854 | 31.52574 | 0.018174337 | 2.17124E-14 | 2.011685142 |
| IMGA Medtr4g112460.1 | Mtr.14271.1.S1_at   | 12.66522 | 14.12224 | 14.01728 | 35.70156 | 40.17394 | 45.40412 | 13.60158 | 0.81261  | 40.42654 | 4.856212 | 0.000703226 | 0           | 2.972194575 |
| IMGA Medtr3g014180.1 | Mtr.14281.1.S1_at   | 212.9429 | 273.0876 | 225.4235 | 863.4488 | 771.0316 | 596.0316 | 237.1513 | 31.74118 | 743.504  | 135.8172 | 0.003267456 | 4.7709E-168 | 3.135146083 |
| IMGA Medtr8g091660.1 | Mtr.14283.1.S1_at   | 1045.326 | 937.768  | 1025.775 | 2765.625 | 2297.823 | 3208.448 | 1002.956 | 57.29486 | 2757.299 | 455.3699 | 0.002699138 | 0           | 2.7491711   |
| IMGA Medtr4g062080.1 | Mtr.14303.1.S1_at   | 50.41591 | 52.62534 | 31.47798 | 105.4412 | 93.9157  | 104.5704 | 44.83974 | 11.62424 | 101.3091 | 6.417667 | 0.001809863 | 0           | 2.259359701 |
|                      | Mtr.14757.1.S1_at   | 5.109534 | 4.852313 | 4.432092 | 7.434876 | 21.61933 | 16.00565 | 4.79798  | 0.341974 | 15.01995 | 7.143417 | 0.068528734 | 0           | 3.130474639 |
| IMGA Medtr2g093760.1 | Mtr.14931.S1_at     | 72.10979 | 68.56597 | 103.7928 | 441.0848 | 451.2491 | 794.0316 | 81.48952 | 19.39632 | 562.1219 | 200.904  | 0.014559069 | 0           | 6.898087736 |
| IMGA Medtr1g086450.1 | Mtr.14994.1.S1_at   | 11.0076  | 9.311398 | 15.45214 | 124.5606 | 7.77715  | 32.53648 | 11.92371 | 3.171215 | 54.95806 | 61.53566 | 0.29300101  | 3.6792E-122 | 4.609140498 |
| IMGA Medtr1g086510.1 | Mtr.15010.1.S1_s_at | 7.010345 | 5.501826 | 6.037856 | 24.22159 | 10.35539 | 40.3819  | 6.183342 | 0.76471  | 24.98629 | 15.02785 | 0.096417723 | 0           | 4.04090393  |
| IMGA Medtr4g087510.1 | Mtr.15070.1.S1_s_at | 7.847143 | 8.939342 | 10.26677 | 44.61449 | 35.30177 | 61.90121 | 9.01775  | 1.211715 | 47.27249 | 13.49746 | 0.008105848 | 0           | 5.242160258 |
|                      | Mtr.1509.1.S1_at    | 39.18284 | 55.65704 | 44.84012 | 203.2178 | 233.7436 | 173.6122 | 46.56    | 8.370679 | 203.5245 | 30.0669  | 0.000956475 | 0           | 4.371231313 |
|                      | Mtr.15261.1.S1_s_at | 70.03165 | 95.23482 | 66.66145 | 262.6656 | 434.0604 | 519.1781 | 77.30931 | 15.61514 | 405.3014 | 130.6521 | 0.012472441 | 8.4145E-290 | 5.242595088 |
| IMGA Medtr1g043080.1 | Mtr.15332.1.S1_at   | 26.86633 | 40.46691 | 41.77962 | 90.69831 | 57.95361 | 94.11359 | 36.37096 | 8.257374 | 80.92184 | 19.96423 | 0.02334063  | 9.1974E-21  | 2.224902737 |
| IMGA Medtr1g017830.1 | Mtr.15537.1.S1_at   | 11.14126 | 9.223665 | 15.84085 | 46.47045 | 107.6983 | 124.8799 | 12.06859 | 3.404666 | 93.01622 | 41.21509 | 0.027523645 | 0           | 7.707297145 |
| IMGA Medtr5g097940.1 | Mtr.15678.1.S1_s_at | 48.53131 | 56.22541 | 94.48772 | 1015.82  | 811.0316 | 957.0776 | 66.41482 | 24.61434 | 927.9763 | 105.4499 | 0.000160671 | 0           | 13.97242886 |
| IMGA Medtr5g037710.1 | Mtr.15831.1.S1_s_at | 32.38488 | 41.57588 | 81.23993 | 170.5961 | 177.8381 | 283.6548 | 51.73356 | 25.96321 | 210.6963 | 63.28755 | 0.015799436 | 2.83418E-26 | 4.072720605 |
|                      | Mtr.1587.1.S1_at    | 9.38672  | 9.225548 | 15.37992 | 88.84869 | 88.24935 | 89.53236 | 11.33073 | 3.507625 | 88.8768  | 0.641963 | 2.96689E-06 | 0           | 7.843873781 |
| IMGA Medtr1g008220.1 | Mtr.15921.1.S1_at   | 108.3112 | 142.9219 | 185.0059 | 323.443  | 343.5528 | 381.6542 | 145.413  | 38.40801 | 349.55   | 29.56538 | 0.001877387 | 0           | 2.403843246 |
| IMGA Medtr4g086620.1 | Mtr.16207.1.S1_at   | 109.178  | 82.09145 | 124.3233 | 326.1399 | 353.1188 | 357.1996 | 105.1976 | 21.39546 | 345.4861 | 16.87811 | 0.000107206 | 0           | 3.284163436 |
| IMGA Medtr7g077160.1 | Mtr.16278.1.S1_at   | 14.61252 | 25.64133 | 53.74831 | 209.2002 | 299.0839 | 537.365  | 31.33405 | 20.17939 | 348.5497 | 169.5824 | 0.032365764 | 3.0733E-163 | 11.12367111 |
|                      | Mtr.16773.1.S1_x_at | 23.64417 | 13.01508 | 20.97148 | 27.77542 | 183.6929 | 38.91199 | 19.21024 | 5.529091 | 83.46011 | 86.98257 | 0.270755482 | 4.28307E-90 | 4.344562933 |
| IMGA Medtr4g127930.1 | Mtr.16818.1.S1_s_at | 27.68789 | 45.68433 | 52.46636 | 115.7908 | 108.0878 | 141.2633 | 41.94619 | 12.80521 | 121.714  | 17.36276 | 0.003053735 | 3.85896E-27 | 2.901668734 |
| IMGA Medtr2g035850.1 | Mtr.16822.1.S1_at   | 49.21243 | 26.69318 | 82.51571 | 177.1819 | 119.8956 | 149.4089 | 52.80711 | 28.08434 | 148.8288 | 28.64756 | 0.014310297 | 3.18117E-09 | 2.81834812  |
| IMGA Medtr5g089250.1 | Mtr.17039.1.S1_s_at | 10.99841 | 22.00212 | 11.07449 | 72.918   | 60.81806 | 57.185   | 14.69167 | 6.33115  | 63.64036 | 8.237463 | 0.001227524 | 0           | 4.331729417 |
| IMGA Medtr3g088630.1 | Mtr.17273.1.S1_s_at | 71.17587 | 66.16062 | 83.23108 | 183.3527 | 184.6709 | 201.3736 | 73.52252 | 8.773837 | 189.799  | 10.04549 | 0.000112114 | 0           | 2.581508909 |
| IMGA Medtr3g088460.1 | Mtr.17288.1.S1_at   | 60.07634 | 43.05808 | 70.30205 | 222.2865 | 274.9586 | 359.723  | 57.81216 | 13.76239 | 285.656  | 69.33991 | 0.005049194 | 7.8147E-181 | 4.941106175 |
| IMGA Medtr5g097940.1 | Mtr.17404.1.S1_s_at | 36.72334 | 37.45656 | 71.72121 | 776.9338 | 538.5603 | 651.6595 | 48.6337  | 19.99773 | 655.7179 | 119.2385 | 0.000962349 | 0           | 13.48278772 |
| IMGA Medtr7g092540.1 | Mtr.17497.1.S1_at   | 30.66127 | 25.48048 | 56.43935 | 72.40503 | 82.19831 | 94.70362 | 37.52703 | 16.58212 | 83.10232 | 11.17675 | 0.016853382 | 1.63225E-12 | 2.214465624 |
| IMGA Medtr3g095420.1 | Mtr.17526.1.S1_at   | 33.01979 | 17.95419 | 22.19661 | 351.0064 | 448.7582 | 396.0551 | 24.3902  | 7.768652 | 398.6066 | 48.92583 | 0.000197003 | 0           | 16.34290031 |
| IMGA Medtr3g095340.1 | Mtr.17531.1.S1_at   | 40.53159 | 34.70688 | 39.46562 | 98.52236 | 56.78664 | 83.86628 | 38.2347  | 3.10132  | 79.72509 | 21.1738  | 0.028353439 | 8.7613E-119 | 2.085150515 |
| IMGA Medtr7g016800.1 | Mtr.17621.1.S1_x_at | 75.06488 | 51.79686 | 75.55214 | 407.4751 | 214.9484 | 279.8451 | 67.47129 | 13.57664 | 300.7562 | 97.95197 | 0.015023881 | 1.2309E-194 | 4.45754346  |
| IMGA Medtr1g014240.1 | Mtr.17910.1.S1_at   | 28.38516 | 20.95624 | 33.82984 | 94.82768 | 119.0584 | 166.1693 | 27.72375 | 6.462237 | 126.6851 | 36.27713 | 0.00964932  | 5.0909E-155 | 4.56955283  |

|                       |                         |                 |                 |                 |                 |                 |                 |                 |                 |                 |                 |                   |             |                    |
|-----------------------|-------------------------|-----------------|-----------------|-----------------|-----------------|-----------------|-----------------|-----------------|-----------------|-----------------|-----------------|-------------------|-------------|--------------------|
| IMGA Medtr5g074290.1  | Mtr.18.1.S1_at          | 175.1648        | 158.5985        | 222.5333        | 322.688         | 339.5472        | 451.8471        | 185.4322        | 33.18102        | 371.3608        | 70.21107        | 0.014295777       | 2.85731E-22 | 2.0026765          |
| IMGA Medtr4g059730.1  | Mtr.18369.1.S1_at       | 18.07694        | 25.3401         | 22.6444         | 47.71824        | 36.69929        | 50.23736        | 22.02048        | 3.671556        | 44.88496        | 7.200028        | 0.008043963       | 3.99732E-27 | 2.038328169        |
| IMGA Medtr5g014100.1  | Mtr.18570.1.S1_at       | 8.97505         | 7.604541        | 8.878652        | 14.17464        | 25.25278        | 15.47759        | 8.486081        | 0.764956        | 18.30167        | 6.054988        | 0.049532035       | 2.0262E-109 | 2.156669296        |
| IMGA Medtr3g098390.1  | Mtr.18629.1.S1_at       | 64.16479        | 91.82816        | 134.0092        | 325.9427        | 241.3347        | 347.3085        | 96.66737        | 35.17276        | 304.862         | 56.04382        | 0.005506757       | 1.15494E-24 | 3.153721458        |
| IMGA Medtr2g034480.1  | Mtr.18650.1.S1_at       | 343.4249        | 230.8756        | 459.843         | 1152.809        | 1385.221        | 2062.768        | 344.7145        | 114.4892        | 1533.599        | 472.7774        | 0.013335842       | 2.50541E-72 | 4.448897423        |
| IMGA Medtr3g116440.1  | Mtr.1872.1.S1_at        | 20.23245        | 25.17798        | 26.36489        | 328.7218        | 344.218         | 490.135         | 23.9251         | 3.252532        | 387.6916        | 89.05631        | 0.002111664       | 0           | 16.20438661        |
|                       | <b>Mtr.1887.1.S1_at</b> | <b>48.82566</b> | <b>35.48447</b> | <b>47.11124</b> | <b>90.34688</b> | <b>91.86498</b> | <b>94.92009</b> | <b>43.80712</b> | <b>7.258426</b> | <b>92.37732</b> | <b>2.329257</b> | <b>0.00038329</b> | <b>0</b>    | <b>2.108728182</b> |
| IMGA Medtr8g102150.1  | Mtr.19134.1.S1_at       | 289.846         | 389.7435        | 190.3245        | 711.2746        | 1180.698        | 784.7276        | 289.9713        | 99.70956        | 892.2335        | 252.5031        | 0.018420265       | 1.29275E-25 | 3.076971744        |
| IMGA AC233577_9.1     | Mtr.1954.1.S1_at        | 19.17137        | 24.26972        | 24.7662         | 39.5855         | 55.86498        | 46.73617        | 22.73576        | 3.096818        | 47.39555        | 8.159744        | 0.008079477       | 2.8407E-43  | 2.084625289        |
| IMGA Medtr1g043350.1  | Mtr.19570.1.S1_at       | 11.18492        | 10.40329        | 14.83832        | 108.7282        | 21.2032         | 67.51723        | 12.14218        | 2.367414        | 65.81621        | 43.78729        | 0.101338088       | 0           | 5.420462378        |
| IMGA Medtr1g043320.1  | Mtr.19575.1.S1_at       | 11.7955         | 17.66616        | 10.63816        | 48.8558         | 119.1226        | 159.5032        | 13.36661        | 3.768219        | 109.1605        | 55.99235        | 0.041696089       | 0           | 8.166660258        |
| IMGA Medtr1g083580.1  | Mtr.19594.1.S1_at       | 24.30692        | 26.75732        | 32.78857        | 56.60485        | 41.90793        | 76.2744         | 27.95094        | 4.364992        | 58.26239        | 17.24309        | 0.041900575       | 2.54092E-33 | 2.084452209        |
| IMGA Medtr8g077810.1  | Mtr.19623.1.S1_at       | 9.040911        | 7.9761          | 7.264361        | 19.33446        | 15.83804        | 17.95419        | 8.093791        | 0.894103        | 17.70889        | 1.76107         | 0.001083267       | 0           | 2.187960425        |
| IMGA Medtr2g020710.1  | Mtr.19796.1.S1_at       | 20.32088        | 34.6355         | 31.22652        | 88.03165        | 63.63745        | 131.0316        | 28.72763        | 7.477325        | 94.23358        | 34.12246        | 0.031435015       | 5.27191E-52 | 3.280241806        |
| IMGA Medtr8g078270.1  | Mtr.19871.1.S1_at       | 62.1447         | 89.40866        | 126.1428        | 219.7519        | 166.8702        | 216.2755        | 92.56539        | 32.11562        | 200.9659        | 29.57882        | 0.012643086       | 2.18668E-10 | 2.171069375        |
| IMGA Medtr4g076430.1  | Mtr.19888.1.S1_at       | 10.65816        | 15.4709         | 20.6229         | 140.5889        | 300.8239        | 79.79522        | 15.58399        | 4.983336        | 173.736         | 114.1817        | 0.074617744       | 0           | 11.14836767        |
| IMGA Medtr4g083130.1  | Mtr.19978.1.S1_at       | 22.44814        | 29.37937        | 34.99502        | 70.09622        | 57.06326        | 60.10689        | 28.94084        | 6.284927        | 62.42212        | 6.81797         | 0.003333659       | 0           | 2.156886814        |
| IMGA Medtr4g083000.2  | Mtr.19990.1.S1_at       | 436.7679        | 370.1983        | 289.1804        | 801.0316        | 621.646         | 976.181         | 365.3822        | 73.91157        | 799.6196        | 177.2718        | 0.01730578        | 2.53884E-24 | 2.188446906        |
|                       | Mtr.20002.1.S1_s_at     | 262.5976        | 270.8651        | 286.7624        | 696.0694        | 613.0445        | 701.5261        | 273.4084        | 12.28147        | 670.2133        | 49.58476        | 0.000176556       | 0           | 2.45132704         |
| IMGA Medtr4g086320.1  | Mtr.20215.1.S1_s_at     | 18.55114        | 16.37684        | 18.86448        | 103.9929        | 59.19831        | 81.83816        | 17.93082        | 1.354873        | 61.67647        | 22.39774        | 0.007926266       | 0           | 4.555089135        |
| IMGA Medtr8g038100.1  | Mtr.20386.1.S1_s_at     | 2140.577        | 1054.834        | 1364.532        | 6224.389        | 4419.222        | 3627.964        | 1519.981        | 559.3147        | 4757.192        | 1330.798        | 0.017778338       | 1.1861E-23  | 3.129770393        |
| IMGA Medtr6g012640.1  | Mtr.20391.1.S1_at       | 238.6012        | 132.8786        | 328.5076        | 535.1187        | 577.1012        | 785.5851        | 233.3291        | 97.92101        | 632.6017        | 134.1402        | 0.014098832       | 1.63614E-12 | 2.711199184        |
| IMGA Medtr7g0116700.1 | Mtr.20464.1.S1_x_at     | 50.66746        | 60.64609        | 63.89711        | 245.2565        | 146.1927        | 137.9676        | 58.40355        | 6.894026        | 176.4723        | 59.7107         | 0.027220524       | 2.2716E-193 | 3.021602076        |
| IMGA Medtr5g043070.1  | Mtr.20555.1.S1_s_at     | 8.114542        | 7.900799        | 8.606409        | 15.18654        | 14.19688        | 21.84452        | 8.20725         | 0.361825        | 17.07598        | 4.159218        | 0.021215713       | 0           | 2.080597399        |
| IMGA Medtr8g076520.1  | Mtr.20735.1.S1_at       | 39.66425        | 39.86525        | 70.2459         | 121.0712        | 79.92075        | 104.865         | 49.92513        | 17.59859        | 101.9523        | 20.72928        | 0.0295448         | 3.04712E-07 | 2.042104085        |
| IMGA Medtr3g079340.1  | Mtr.20784.1.S1_s_at     | 87.41005        | 107.7599        | 90.50291        | 156.865         | 143.6004        | 207.0651        | 95.22429        | 10.96575        | 289.1768        | 199.7207        | 0.16835407        | 4.1903E-206 | 3.036797089        |
| IMGA Medtr4g100600.3  | Mtr.20884.1.S1_at       | 644.5186        | 671.4772        | 865.213         | 1528.239        | 1645.95         | 1533.117        | 727.0696        | 120.3926        | 1569.102        | 66.59682        | 0.000448266       | 0           | 2.158118345        |
|                       | Mtr.2090.1.S1_at        | 22.27874        | 29.18546        | 19.54126        | 47.46854        | 44.82757        | 70.53159        | 23.66849        | 4.970026        | 54.2759         | 14.13963        | 0.024075161       | 1.4579E-26  | 2.293171547        |
| IMGA Medtr1g083950.1  | Mtr.21000.1.S1_at       | 125.7714        | 109.6581        | 137.0368        | 270.5529        | 311.9311        | 295.3143        | 124.1554        | 13.76067        | 292.5994        | 20.82228        | 0.000306238       | 0           | 2.356719066        |
|                       | Mtr.2103.1.S1_at        | 87.36498        | 78.54954        | 69.62002        | 156.2578        | 187.9459        | 184.865         | 78.51152        | 8.872541        | 176.3562        | 17.47382        | 0.00098354        | 0           | 2.246246681        |
| IMGA Medtr7g024760.1  | Mtr.2105.1.S1_at        | 49.16145        | 54.73191        | 47.58668        | 235.9945        | 182.7097        | 252.5547        | 50.49335        | 3.754205        | 223.753         | 36.49621        | 0.001216663       | 0           | 4.43133605         |
| IMGA Medtr2g037790.1  | Mtr.21098.1.S1_at       | 29.26072        | 15.18569        | 18.76619        | 106.4508        | 77.56055        | 125.3039        | 21.07087        | 7.315069        | 103.1051        | 24.04686        | 0.004824591       | 4.84445E-84 | 4.893253035        |
|                       | Mtr.21324.1.S1_at       | 55.84232        | 44.93395        | 80.95496        | 157.3243        | 108.2559        | 195.5192        | 60.57707        | 18.47138        | 153.6998        | 43.74443        | 0.027358767       | 2.50062E-18 | 2.537260256        |
| IMGA Medtr4g118800.2  | Mtr.21662.1.S1_at       | 82.72042        | 106.2751        | 59.94661        | 277.4533        | 243.7474        | 360.0815        | 82.98071        | 23.16534        | 293.7607        | 59.85696        | 0.004717366       | 5.87947E-56 | 3.540108775        |
| IMGA Medtr6g012830.1  | Mtr.21790.1.S1_at       | 17.87958        | 18.8044         | 29.0271         | 90.57148        | 47.31522        | 118.8758        | 21.90369        | 6.186357        | 85.58751        | 36.03971        | 0.039298391       | 4.12489E-71 | 3.907446942        |
| IMGA Medtr6g012810.1  | Mtr.21791.1.S1_at       | 15.60048        | 17.185          | 20.92459        | 92.06346        | 68.69831        | 121.3472        | 17.90335        | 2.733783        | 94.03631        | 26.37981        | 0.007639947       | 0           | 5.252440921        |
| IMGA Medtr5g032910.1  | Mtr.21812.1.S1_at       | 15.96549        | 10.06605        | 14.22455        | 32.17869        | 18.97705        | 36.02755        | 13.39869        | 3.064353        | 29.0611         | 8.942563        | 0.045478798       | 8.53795E-19 | 2.16895026         |
| IMGA Medtr5g032790.1  | Mtr.21822.1.S1_at       | 120.5277        | 75.07469        | 89.51394        | 191.0131        | 249.3349        | 238.8833        | 95.03878        | 23.22472        | 226.4104        | 31.09723        | 0.004225968       | 1.15498E-22 | 2.382295086        |
| IMGA Medtr7g050870.1  | Mtr.21871.1.S1_at       | 273.1514        | 342.9153        | 368.4972        | 725.7268        | 908.1153        | 979.2307        | 328.188         | 49.34954        | 871.0243        | 130.7588        | 0.002543135       | 6.29327E-81 | 2.654040839        |
| IMGA Medtr8g032300.1  | Mtr.22068.1.S1_at       | 31.61996        | 45.25574        | 41.58471        | 80.30094        | 78.22128        | 91.69681        | 39.4868         | 7.055815        | 83.40634        | 7.25466         | 0.001676571       | 0           | 2.112258687        |
|                       | Mtr.2238.1.S1_s_at      | 5229.698        | 4861.865        | 4596.282        | 14340.86        | 19398.53        | 16161.7         | 4895.948        | 318.0808        | 16633.7         | 2561.657        | 0.00140492        | 0           | 3.397441568        |
| IMGA Medtr6g071400.1  | Mtr.22423.1.S1_at       | 12.19176        | 11.59599        | 9.506168        | 85.05679        | 16.82927        | 16.57553        | 11.09797        | 1.410359        | 39.4872         | 39.46463        | 0.281032068       | 2.6107E-266 | 3.558055792        |
| IMGA Medtr4g127560.1  | Mtr.22444.1.S1_at       | 10.62635        | 15.50348        | 11.41413        | 79.01202        | 28.10908        | 20.61503        | 12.51465        | 2.618201        | 42.57871        | 31.77388        | 0.177741654       | 5.1128E-88  | 3.402308952        |
| IMGA Medtr2g008030.1  | Mtr.22592.1.S1_at       | 33.70154        | 29.37937        | 37.43909        | 88.54389        | 45.1493         | 175.0368        | 33.50667        | 4.033392        | 102.91          | 66.12474        | 0.143783636       | 3.5021E-195 | 3.071329298        |
| IMGA Medtr2g045280.1  | Mtr.22656.1.S1_s_at     | 24.49372        | 16.94226        | 21.48941        | 77.76202        | 72.99677        | 145.7358        | 20.97513        | 3.801908        | 98.83155        | 40.69014        | 0.029941          | 1.4632E-275 | 4.711844292        |
| IMGA Medtr4g016920.1  | Mtr.2288.1.S1_at        | 15.48197        | 14.57123        | 17.37074        | 56.08788        | 52.14284        | 78.03808        | 15.80798        | 1.427945        | 62.0896         | 13.95193        | 0.004635078       | 0           | 3.927737597        |
| IMGA Medtr7g021010.1  | Mtr.23418.1.S1_s_at     | 170.6168        | 187.1983        | 205.3781        | 2201.086        | 2128.397        | 2895.764        | 187.7311        | 17.38681        | 2408.415        | 423.618         | 0.000818345       | 0           | 12.82907247        |
| IMGA Medtr3g034610.1  | Mtr.23565.1.S1_at       | 3.620191        | 6.988346        | 12.97858        | 9.88213         | 192.3851        | 144.2499        | 7.862371        | 4.74002         | 115.5057        | 94.58596        | 0.120350539       | 0           | 14.6909496         |
| IMGA Medtr7g023650.1  | Mtr.23575.1.S1_x_at     | 165.1563        | 158.3588        | 235.5492        | 378.8325        | 495.9383        | 622.9182        | 186.3547        | 42.73901        | 499.2297        | 122.0761        | 0.013808695       | 7.66838E-37 | 2.678921243        |
| IMGA Medtr7g023650.1  | Mtr.23578.1.S1_s_at     | 196.8419        | 119.7359        | 222.2719        | 1362.271        | 2784.367        | 3498.152        | 179.6166        | 53.39423        | 2548.263        | 1087.339        | 0.019629257       | 0           | 14.18724008        |

|                      |                     |          |          |          |          |          |          |          |          |          |          |             |             |             |
|----------------------|---------------------|----------|----------|----------|----------|----------|----------|----------|----------|----------|----------|-------------|-------------|-------------|
| IMGA Medtr7g023740.1 | Mtr.23580.1.S1_at   | 32.43681 | 41.61961 | 57.0672  | 125.061  | 194.7081 | 157.7816 | 43.70788 | 12.44727 | 159.1836 | 34.84469 | 0.005671411 | 4.2382E-58  | 3.641988829 |
| IMGA Medtr3g009020.1 | Mtr.23863.1.S1_at   | 85.6111  | 83.35712 | 160.0593 | 234.2948 | 249.5806 | 317.1223 | 109.6759 | 43.64793 | 266.9992 | 44.07556 | 0.011756341 | 4.29382E-10 | 2.434439363 |
| IMGA Medtr7g071970.1 | Mtr.23965.1.S1_s_at | 1217.905 | 808.0316 | 979.1312 | 3010.079 | 2883.656 | 3084.853 | 1001.689 | 205.8656 | 2992.863 | 101.6973 | 0.000114484 | 0           | 2.987815557 |
| IMGA Medtr1g102240.1 | Mtr.24211.1.S1_at   | 81.47401 | 133.5737 | 147.1744 | 1233.059 | 220.6983 | 469.865  | 120.7407 | 34.67925 | 641.2075 | 527.482  | 0.163331008 | 5.6932E-149 | 5.310615353 |
| IMGA Medtr4g070590.1 | Mtr.24242.1.S1_at   | 106.865  | 116.5082 | 149.6983 | 291.0752 | 267.6389 | 353.9651 | 124.3572 | 22.4695  | 304.2264 | 44.64043 | 0.003373512 | 1.0303E-43  | 2.446392187 |
| IMGA Medtr1g019440.1 | Mtr.24415.1.S1_at   | 17.34119 | 17.57769 | 17.61708 | 72.41323 | 149.6983 | 156.6917 | 17.51198 | 0.149221 | 126.2677 | 46.77026 | 0.015765519 | 0           | 7.210361796 |
| IMGA Medtr1g019440.1 | Mtr.24415.1.S1_s_at | 53.61852 | 38.7358  | 42.47181 | 196.1699 | 407.048  | 385.3766 | 44.94204 | 7.742763 | 329.5315 | 116.0017 | 0.013265212 | 0           | 7.332366327 |
| IMGA Medtr8g023060.1 | Mtr.24476.1.S1_at   | 96.67045 | 106.9801 | 97.37161 | 179.4238 | 376.1642 | 273.6098 | 100.3407 | 5.760522 | 276.3993 | 98.39985 | 0.036442601 | 0           | 2.754607804 |
| IMGA Medtr8g023060.1 | Mtr.24476.1.S1_s_at | 61.30268 | 75.31902 | 75.16051 | 143.5799 | 291.8189 | 214.8641 | 70.59407 | 8.046975 | 216.7543 | 74.13757 | 0.027409552 | 3.0759E-217 | 3.070432091 |
| IMGA Medtr8g088860.1 | Mtr.24519.1.S1_at   | 271.4808 | 386.255  | 410.4273 | 1808.432 | 2326.035 | 2158.68  | 356.0544 | 74.23333 | 2097.716 | 264.1321 | 0.00038886  | 0           | 5.891560099 |
| IMGA Medtr8g093990.1 | Mtr.24708.1.S1_at   | 5.877876 | 5.258006 | 5.340203 | 9.283153 | 10.63479 | 14.04084 | 5.492028 | 0.336672 | 11.31959 | 2.451655 | 0.015113381 | 2.2669E-197 | 2.06109546  |
| IMGA Medtr3g052760.1 | Mtr.2494.1.S1_s_at  | 11.43835 | 10.46823 | 4.802918 | 20.18113 | 55.44071 | 20.96949 | 8.903165 | 3.583895 | 32.19711 | 20.13341 | 0.119766465 | 2.12376E-29 | 3.616366554 |
| IMGA Medtr7g074710.1 | Mtr.25021.1.S1_at   | 94.66341 | 104.5754 | 123.9832 | 469.5859 | 534.8533 | 436.8789 | 107.7407 | 14.91398 | 480.4394 | 49.8808  | 0.00024321  | 0           | 4.459220926 |
| IMGA Medtr5g018750.1 | Mtr.25125.1.S1_at   | 48.40404 | 55.45817 | 39.19532 | 112.2858 | 97.24869 | 145.1665 | 47.68584 | 8.155175 | 118.2337 | 24.50634 | 0.009096907 | 9.42512E-51 | 2.479429045 |
| IMGA Medtr5g006780.1 | Mtr.25362.1.S1_s_at | 26.07186 | 24.96387 | 29.78813 | 172.7243 | 254.602  | 220.5932 | 26.94129 | 2.526916 | 215.9732 | 41.13391 | 0.001359274 | 0           | 8.016439142 |
| IMGA Medtr1g102370.1 | Mtr.25887.1.S1_at   | 23.29658 | 33.10321 | 31.10475 | 54.86498 | 70.76669 | 94.93942 | 29.16818 | 5.182206 | 73.5237  | 20.17897 | 0.021063562 | 1.01063E-49 | 2.52068186  |
| IMGA Medtr6g092620.1 | Mtr.25950.1.S1_at   | 6.663752 | 5.946856 | 6.209657 | 13.82431 | 70.80042 | 16.57951 | 6.273422 | 0.362677 | 33.73475 | 32.12936 | 0.212896862 | 0           | 5.377407863 |
| IMGA Medtr7g072270.1 | Mtr.25969.1.S1_at   | 12.48303 | 19.65177 | 19.65177 | 65.76527 | 36.3661  | 84.80472 | 17.26219 | 4.138873 | 62.31203 | 24.40325 | 0.034432861 | 2.79826E-79 | 3.609740963 |
|                      | Mtr.2604.1.S1_x_at  | 351.6141 | 292.9597 | 300.2968 | 2142.372 | 4347.032 | 2511.641 | 314.9568 | 31.95739 | 3000.348 | 1180.787 | 0.016993227 | 0           | 9.526220069 |
| IMGA Medtr4g078660.1 | Mtr.26151.1.S1_s_at | 29.9511  | 33.87024 | 32.51694 | 172.9426 | 85.334   | 102.1594 | 32.11276 | 1.990585 | 120.1454 | 46.49128 | 0.030595949 | 0           | 3.741358576 |
| IMGA Medtr5g078220.1 | Mtr.26370.1.S1_at   | 88.00557 | 156.9497 | 69.56126 | 430.5661 | 520.6211 | 431.4067 | 104.8389 | 46.06198 | 460.8646 | 51.75232 | 0.000880594 | 0           | 4.395933575 |
|                      | Mtr.26884.1.S1_at   | 69.97499 | 100.4485 | 112.0316 | 175.0316 | 218.9386 | 191.4886 | 94.1517  | 21.7239  | 195.1529 | 22.18164 | 0.004882117 | 8.08884E-16 | 2.072750026 |
|                      | Mtr.26895.1.S1_s_at | 7.761813 | 6.687713 | 7.642456 | 53.30785 | 7.789143 | 8.001094 | 7.363994 | 0.588709 | 23.0327  | 26.21927 | 0.359212034 | 0           | 3.12774517  |
|                      | Mtr.26988.1.S1_at   | 16.09978 | 25.15141 | 51.00382 | 61.34499 | 64.1209  | 65.43346 | 30.75167 | 18.1134  | 63.63312 | 2.087427 | 0.035405428 | 0           | 2.069257044 |
|                      | Mtr.2742.1.S1_at    | 90.93926 | 92.19831 | 115.5034 | 208.2134 | 183.6983 | 218.775  | 99.54698 | 13.83297 | 203.5622 | 17.99495 | 0.001363983 | 0           | 2.044885941 |
| IMGA Medtr3g085020.1 | Mtr.27693.1.S1_at   | 25.37992 | 25.32397 | 13.64865 | 96.53165 | 47.29295 | 107.075  | 21.45084 | 6.75696  | 83.63319 | 31.91003 | 0.029877615 | 3.36767E-57 | 3.898829606 |
| IMGA Medtr5g089180.1 | Mtr.27718.1.S1_at   | 13.58065 | 12.59177 | 5.418434 | 8.587357 | 94.81159 | 7.531337 | 10.53028 | 4.454517 | 36.97676 | 50.08921 | 0.413873363 | 8.39192E-25 | 3.511468827 |
| IMGA Medtr7g100240.1 | Mtr.27895.1.S1_at   | 112.5116 | 99.84329 | 131.1522 | 307.66   | 196.3373 | 230.008  | 114.5024 | 15.74911 | 244.6684 | 57.091   | 0.018991629 | 1.75449E-46 | 2.136797852 |
| IMGA Medtr3g104940.1 | Mtr.27950.1.S1_at   | 27.13378 | 38.69873 | 51.85781 | 82.12218 | 63.49079 | 97.28258 | 39.23011 | 12.37058 | 80.96518 | 16.92558 | 0.026099852 | 5.11209E-09 | 2.063853168 |
| IMGA Medtr5g035610.1 | Mtr.28125.1.S1_s_at | 35.28819 | 62.86059 | 10.18506 | 29.32246 | 1214.922 | 62.32347 | 36.11128 | 26.34741 | 435.5226 | 675.1812 | 0.363789307 | 5.966E-152  | 12.06056866 |
| IMGA Medtr7g110580.1 | Mtr.2814.1.S1_at    | 18.9422  | 15.26041 | 41.36515 | 96.01064 | 66.74866 | 80.98421 | 25.18925 | 14.12917 | 81.24784 | 14.63277 | 0.008817701 | 6.32883E-12 | 3.225496163 |
| IMGA AC233685_68.1   | Mtr.28242.1.S1_at   | 5.799476 | 5.443935 | 6.516506 | 14.72005 | 14.17095 | 13.62055 | 5.919972 | 0.546344 | 14.17052 | 0.54975  | 5.09152E-05 | 0           | 2.393679824 |
|                      | Mtr.28311.1.S1_s_at | 80.21079 | 114.8032 | 114.7236 | 406.4682 | 280.5593 | 548.5185 | 103.2458 | 19.94898 | 411.8487 | 134.0606 | 0.016907206 | 3.7818E-158 | 3.989009759 |
|                      | Mtr.2846.1.S1_at    | 710.5467 | 500.334  | 447.4935 | 1429.915 | 999.8743 | 930.5075 | 552.7914 | 139.1513 | 1120.099 | 270.5413 | 0.031981118 | 1.64809E-12 | 2.026260072 |
|                      | Mtr.28491.1.S1_at   | 9.525346 | 13.15061 | 18.80234 | 59.19606 | 41.74922 | 60.65448 | 13.8261  | 4.675239 | 53.86659 | 10.51925 | 0.003824623 | 8.84346E-50 | 3.896007828 |
| IMGA AC233070_1030.1 | Mtr.28786.1.S1_at   | 203.6667 | 215.6817 | 274.9307 | 442.5026 | 504.6157 | 605.0102 | 231.4264 | 38.15179 | 517.3762 | 82.00186 | 0.005412216 | 1.5515E-38  | 2.235597429 |
| IMGA Medtr2g027550.1 | Mtr.29026.1.S1_at   | 18.12985 | 16.90922 | 26.12697 | 295.0916 | 379.2441 | 564.9921 | 20.38868 | 5.006839 | 413.1093 | 138.1003 | 0.007916587 | 0           | 20.26169636 |
| IMGA Medtr2g068760.1 | Mtr.29059.1.S1_at   | 23.23766 | 23.9392  | 25.29934 | 58.99461 | 63.9856  | 61.42128 | 24.15873 | 1.048228 | 61.46716 | 2.49581  | 1.82629E-05 | 0           | 2.544304328 |
|                      | Mtr.2927.1.S1_at    | 41.09755 | 48.25692 | 42.05794 | 85.54594 | 98.92869 | 83.93788 | 43.80414 | 3.886002 | 89.47083 | 8.230109 | 0.000965053 | 0           | 2.042520162 |
|                      | Mtr.29298.1.S1_at   | 63.27649 | 50.67713 | 55.35996 | 124.0371 | 93.77761 | 122.7315 | 56.43786 | 6.368466 | 113.5154 | 17.10589 | 0.005631251 | 2.40424E-54 | 2.011334212 |
| IMGA Medtr3g086540.1 | Mtr.29535.1.S1_at   | 60.29905 | 55.02296 | 122.1983 | 155.067  | 161.5375 | 184.865  | 79.17344 | 37.3539  | 167.1565 | 15.67353 | 0.019742124 | 0           | 2.111269818 |
| IMGA Medtr1g108330.1 | Mtr.29620.1.S1_at   | 25.47109 | 39.89346 | 62.62193 | 250.3969 | 118.5869 | 251.6483 | 42.66216 | 18.72954 | 206.8774 | 76.46439 | 0.022497502 | 4.36999E-52 | 4.849200734 |
| IMGA Medtr2g009450.1 | Mtr.29662.1.S1_at   | 111.2511 | 103.2637 | 146.3761 | 225.6544 | 444.1983 | 580.3819 | 120.297  | 22.93558 | 416.7449 | 178.9502 | 0.046582672 | 5.2484E-111 | 3.464300748 |
| IMGA Medtr3g031220.1 | Mtr.29902.1.S1_at   | 78.12368 | 87.18082 | 98.88062 | 253.9369 | 218.475  | 266.3947 | 88.06171 | 10.40647 | 246.2689 | 24.8631  | 0.000527148 | 0           | 2.796548929 |
|                      | Mtr.30156.1.S1_at   | 27.56446 | 28.63735 | 18.41301 | 41.93083 | 53.02588 | 68.76552 | 24.87161 | 5.618971 | 54.57408 | 13.48417 | 0.02441112  | 5.39594E-20 | 2.194232186 |
| IMGA Medtr8g018420.1 | Mtr.30415.1.S1_at   | 12.35225 | 10.78895 | 11.89585 | 26.14947 | 19.11775 | 24.83444 | 11.67902 | 0.803894 | 23.36722 | 3.738429 | 0.006110932 | 6.3313E-140 | 2.000786453 |
|                      | Mtr.30446.1.S1_at   | 40.49957 | 40.66082 | 20.66402 | 91.76661 | 75.30959 | 51.5723  | 33.94147 | 11.49889 | 72.88283 | 20.20675 | 0.044070415 | 4.47394E-09 | 2.147309068 |
|                      | Mtr.30508.1.S1_at   | 260.5938 | 306.7833 | 406.8433 | 1305.354 | 951.9992 | 945.3541 | 324.7401 | 74.76006 | 1067.569 | 205.9544 | 0.004200749 | 2.23604E-66 | 3.28745641  |
| IMGA Medtr4g006710.1 | Mtr.31163.1.S1_at   | 7.430685 | 7.823621 | 7.964915 | 15.73183 | 16.47532 | 18.71986 | 7.73974  | 0.276817 | 16.97567 | 1.555583 | 0.000535683 | 0           | 2.193312472 |
| IMGA Medtr5g055690.1 | Mtr.31273.1.S1_at   | 6.536035 | 10.76555 | 7.805265 | 14.21162 | 25.79231 | 28.71901 | 8.368951 | 2.170371 | 22.90765 | 7.671833 | 0.034236307 | 4.00534E-31 | 2.73721832  |

|                      |                            |                 |                 |                 |                 |                 |                 |                 |                 |                 |                 |                    |                    |                    |
|----------------------|----------------------------|-----------------|-----------------|-----------------|-----------------|-----------------|-----------------|-----------------|-----------------|-----------------|-----------------|--------------------|--------------------|--------------------|
| IMGA Medtr1g081550.1 | Mtr.31385.1.S1_at          | 7.012977        | 6.712751        | 7.514167        | 12.88963        | 17.15538        | 18.79725        | 7.079965        | 0.404886        | 16.28075        | 3.049379        | 0.006603639        | 0                  | 2.299552375        |
| IMGA Medtr5g029190.1 | Mtr.31491.1.S1_s_at        | 75.3828         | 82.02181        | 75.05751        | 128.4454        | 181.4467        | 165.2948        | 77.48737        | 3.930303        | 158.3956        | 27.1658         | 0.006956236        | 1.9364E-278        | 2.044147727        |
|                      | <b>Mtr.31559.1.S1_s_at</b> | <b>76.78317</b> | <b>65.58529</b> | <b>64.17282</b> | <b>164.5994</b> | <b>139.5622</b> | <b>131.4753</b> | <b>68.84709</b> | <b>6.909035</b> | <b>145.2123</b> | <b>17.26978</b> | <b>0.0020665</b>   | <b>1.08072E-81</b> | <b>2.10920021</b>  |
|                      | Mtr.31738.1.S1_at          | 144.7152        | 160.9258        | 190.3859        | 437.365         | 468.6839        | 469.865         | 165.3423        | 23.15345        | 458.6379        | 18.43239        | 6.75723E-05        | 0                  | 2.773869281        |
|                      | Mtr.31851.1.S1_at          | 9.914725        | 7.863057        | 9.206096        | 17.42981        | 14.74542        | 21.93778        | 8.994626        | 1.042053        | 18.03767        | 3.634504        | 0.014345901        | 4.63758E-51        | 2.005382807        |
|                      | Mtr.31998.1.S1_at          | 200.2529        | 208.0679        | 214.8138        | 384.7244        | 440.2245        | 482.6087        | 207.7115        | 7.287014        | 435.8525        | 49.08841        | 0.001347735        | 0                  | 2.098355002        |
| IMGA Medtr5g006670.1 | Mtr.320.1.S1_at            | 10.19661        | 14.90479        | 13.40633        | 72.88808        | 31.91667        | 14.29285        | 12.83591        | 2.405364        | 39.6992         | 30.06287        | 0.197752542        | 2.30904E-83        | 3.092823717        |
| IMGA Medtr5g006670.1 | Mtr.320.1.S1_x_at          | 14.62772        | 15.89785        | 13.81247        | 95.23319        | 45.86616        | 17.0261         | 14.77934        | 1.05093         | 52.70848        | 39.54997        | 0.172154555        | 0                  | 3.5663614          |
|                      | Mtr.3204.1.S1_at           | 11.87089        | 8.606409        | 8.563996        | 30.8582         | 55.94241        | 46.62411        | 9.68043         | 1.897108        | 44.47491        | 12.67946        | 0.009303564        | 1.855E-221         | 4.594311169        |
| IMGA Medtr1g083290.1 | Mtr.32104.1.S1_s_at        | 11.76473        | 12.53335        | 11.1403         | 25.91819        | 20.8352         | 27.27049        | 11.81279        | 0.697769        | 24.67463        | 3.39309         | 0.003006774        | 1.2238E-223        | 2.088805414        |
| IMGA Medtr4g106590.1 | Mtr.32159.1.S1_at          | 396.032         | 443.1323        | 569.8404        | 2072.429        | 1830.199        | 1463.45         | 469.6682        | 89.89133        | 1788.693        | 306.6035        | 0.002024058        | 1.7074E-142        | 3.808417632        |
|                      | Mtr.32184.1.S1_at          | 103.7388        | 79.03165        | 70.53165        | 291.039         | 157.1369        | 335.0316        | 84.43402        | 17.25014        | 261.0692        | 92.65676        | 0.031491656        | 2.22815E-70        | 3.091990661        |
| IMGA Medtr7g088790.1 | Mtr.32213.1.S1_at          | 12.95535        | 11.40101        | 7.975767        | 24.66698        | 52.86498        | 28.4892         | 10.77737        | 2.547694        | 35.34039        | 15.2966         | 0.051718615        | 1.33079E-62        | 3.279127992        |
| IMGA Medtr2g030400.1 | Mtr.32248.1.S1_at          | 66.86498        | 69.77462        | 73.77586        | 146.9295        | 133.7647        | 157.5134        | 70.13849        | 3.469781        | 146.0692        | 11.89772        | 0.000446387        | 0                  | 2.082582359        |
| IMGA Medtr3g008100.2 | Mtr.32271.1.S1_at          | 7.431573        | 9.08278         | 9.126064        | 16.43267        | 18.0112         | 21.84452        | 8.546806        | 0.966062        | 18.7628         | 2.783112        | 0.003867643        | 6.21427E-75        | 2.195299554        |
| IMGA Medtr3g031220.1 | Mtr.32279.1.S1_at          | 20.24903        | 23.77894        | 27.04141        | 58.85172        | 55.55597        | 67.03409        | 23.6898         | 3.397069        | 60.48059        | 5.909883        | 0.000729142        | 0                  | 2.553022913        |
|                      | Mtr.32284.1.S1_at          | 39.24566        | 35.60048        | 41.22603        | 168.0684        | 113.622         | 264.6829        | 38.69072        | 2.853538        | 182.1244        | 76.50505        | 0.031523282        | 0                  | 4.70718622         |
|                      | <b>Mtr.32364.1.S1_at</b>   | <b>25.99187</b> | <b>36.69929</b> | <b>49.4231</b>  | <b>92.89878</b> | <b>56.22185</b> | <b>78.78622</b> | <b>37.37142</b> | <b>11.73006</b> | <b>75.96895</b> | <b>18.50006</b> | <b>0.037958021</b> | <b>1.20318E-08</b> | <b>2.032808581</b> |
| IMGA Medtr8g102150.2 | Mtr.32738.1.S1_s_at        | 482.6432        | 551.6309        | 274.367         | 1147.753        | 1733.115        | 1118.901        | 436.2137        | 144.3454        | 1333.256        | 346.5878        | 0.014395744        | 5.09503E-27        | 3.056429258        |
| IMGA Medtr3g118390.1 | Mtr.331.1.S1_at            | 41.58714        | 58.06626        | 32.69791        | 609.5084        | 740.8806        | 781.6542        | 44.1171         | 12.87202        | 710.6811        | 89.95865        | 0.0002211          | 0                  | 16.10897006        |
| IMGA Medtr4g126920.2 | Mtr.33150.1.S1_s_at        | 104.8679        | 73.95439        | 150.4552        | 328.544         | 199.865         | 509.3498        | 109.7592        | 38.48425        | 345.9196        | 155.4723        | 0.06304518         | 2.18884E-26        | 3.151623361        |
|                      | Mtr.33212.1.S1_s_at        | 5.230026        | 6.100359        | 5.62493         | 11.28801        | 15.48555        | 31.17701        | 5.651772        | 0.435787        | 19.31686        | 10.48343        | 0.08708713         | 0                  | 3.417840954        |
|                      | <b>Mtr.33499.1.S1_at</b>   | <b>11.00271</b> | <b>9.079426</b> | <b>13.19267</b> | <b>14.80689</b> | <b>43.42721</b> | <b>54.89912</b> | <b>11.0916</b>  | <b>2.05806</b>  | <b>37.71107</b> | <b>20.6483</b>  | <b>0.090418681</b> | <b>3.7116E-111</b> | <b>3.399966605</b> |
|                      | Mtr.33808.1.S1_at          | 112.3284        | 136.6597        | 161.1528        | 380.6495        | 413.6985        | 416.3496        | 136.7136        | 24.41227        | 403.5659        | 19.89038        | 0.000125362        | 0                  | 2.951906281        |
| IMGA Medtr3g117320.1 | Mtr.33892.1.S1_at          | 27.72972        | 34.60832        | 31.3054         | 101.6295        | 100.4684        | 127.15          | 31.21448        | 3.440197        | 109.7493        | 15.08065        | 0.000922228        | 0                  | 3.515973955        |
|                      | Mtr.33931.1.S1_at          | 26.06397        | 21.05912        | 20.88985        | 131.6077        | 305.2525        | 165.1593        | 22.67098        | 2.939635        | 200.6732        | 92.10895        | 0.028688186        | 0                  | 8.851543633        |
|                      | Mtr.34114.1.S1_s_at        | 32.68721        | 24.5522         | 25.04068        | 763.4837        | 332.5567        | 379.1923        | 27.4267         | 4.562276        | 491.7442        | 236.4857        | 0.02727513         | 0                  | 17.92939994        |
| IMGA AC233676_15.1   | Mtr.34199.1.S1_at          | 13.99124        | 15.55987        | 22.03499        | 64.50831        | 39.19858        | 37.69896        | 17.19537        | 4.263991        | 47.13528        | 15.06416        | 0.029590579        | 4.97159E-34        | 2.741161762        |
|                      | Mtr.3430.1.S1_at           | 38.31093        | 66.60216        | 62.11575        | 140.5326        | 154.0773        | 131.4544        | 55.67628        | 15.20522        | 142.0214        | 11.38469        | 0.001406675        | 0                  | 2.550842426        |
| IMGA Medtr1g098080.1 | Mtr.34598.1.S1_at          | 6.147004        | 5.131172        | 7.20351         | 14.79156        | 14.05178        | 21.08           | 6.160562        | 1.036236        | 16.64111        | 3.861942        | 0.01049823         | 1.05279E-68        | 2.701232723        |
|                      | Mtr.34634.1.S1_at          | 21.62452        | 16.68172        | 29.2575         | 62.86542        | 52.81495        | 67.86406        | 22.52125        | 6.335662        | 61.18148        | 7.664575        | 0.0025341          | 0                  | 2.716611495        |
| IMGA AC233676_31.1   | Mtr.35009.1.S1_at          | 213.6663        | 180.5316        | 169.8883        | 395.9266        | 361.5316        | 472.4991        | 188.0288        | 22.83164        | 409.9858        | 56.80396        | 0.003283612        | 1.28354E-63        | 2.180441973        |
| IMGA Medtr4g100590.2 | Mtr.35127.1.S1_s_at        | 34.94746        | 29.37937        | 34.15196        | 84.28809        | 86.22047        | 83.85865        | 32.82626        | 3.01148         | 84.78907        | 1.258085        | 1.02846E-05        | 0                  | 2.582964498        |
|                      | Mtr.35316.1.S1_at          | 32.57497        | 17.35974        | 21.72977        | 40.68389        | 62.21477        | 44.971          | 23.88816        | 7.833885        | 49.28989        | 11.39668        | 0.033490247        | 1.95146E-08        | 2.063360753        |
| IMGA Medtr1g110550.1 | Mtr.35325.1.S1_at          | 42.98641        | 116.4415        | 69.16905        | 67.02926        | 233.6217        | 424.0084        | 76.199          | 37.22874        | 241.5531        | 178.6217        | 0.191577369        | 1.43694E-14        | 3.17002989         |
| IMGA Medtr7g011900.1 | Mtr.35413.1.S1_at          | 10.31199        | 9.126064        | 8.464609        | 28.71414        | 19.52817        | 17.7371         | 9.300887        | 0.936016        | 21.99313        | 5.889051        | 0.02107988         | 5.7366E-122        | 2.364627576        |
|                      | Mtr.35616.1.S1_at          | 7.37798         | 6.584245        | 5.765401        | 14.40577        | 13.07425        | 13.41844        | 6.575875        | 0.806322        | 13.63282        | 0.691165        | 0.000325394        | 0                  | 2.073156598        |
|                      | Mtr.35660.1.S1_at          | 116.865         | 91.91522        | 97.16023        | 296.1661        | 276.7182        | 257.1632        | 101.9801        | 13.1547         | 276.6825        | 19.50146        | 0.000210581        | 0                  | 2.713101842        |
| IMGA Medtr3g087900.1 | Mtr.35677.1.S1_at          | 7.606138        | 6.047388        | 9.577951        | 33.61266        | 22.91058        | 26.08709        | 7.743826        | 1.769304        | 27.53677        | 5.496349        | 0.004034891        | 1.23046E-83        | 3.555965124        |
|                      | Mtr.35741.1.S1_at          | 54.17107        | 41.03182        | 52.11819        | 253.4144        | 191.365         | 345.395         | 49.10702        | 7.068262        | 263.3915        | 77.49817        | 0.008844166        | 0                  | 5.363621087        |
|                      | Mtr.35967.1.S1_s_at        | 70.39837        | 76.14996        | 53.63062        | 129.365         | 135.784         | 210.5316        | 66.72631        | 11.70014        | 158.5602        | 45.12287        | 0.02697225         | 4.29957E-42        | 2.376277224        |
|                      | Mtr.35992.1.S1_at          | 4.089379        | 5.778014        | 5.992404        | 9.679979        | 15.20662        | 12.93323        | 5.286599        | 1.04235         | 12.60661        | 2.77776         | 0.012915472        | 4.88401E-34        | 2.384634873        |
| IMGA Medtr8g036660.1 | Mtr.3624.1.S1_at           | 7.16813         | 5.686447        | 8.570647        | 15.82867        | 11.77923        | 60.51959        | 7.141741        | 1.442281        | 29.37583        | 27.04717        | 0.228141494        | 4.6147E-157        | 4.113258559        |
|                      | Mtr.36965.1.S1_at          | 35.85737        | 33.11511        | 35.8072         | 121.4906        | 85.70135        | 258.0586        | 34.92656        | 1.568962        | 155.0835        | 90.95668        | 0.084064347        | 0                  | 4.4402745          |
|                      | Mtr.37204.1.S1_at          | 6.217299        | 9.270986        | 9.516503        | 25.38871        | 32.23745        | 25.92814        | 8.334929        | 1.838026        | 27.85143        | 3.807966        | 0.00132736         | 0                  | 3.34153167         |
|                      | Mtr.37222.1.S1_at          | 411.1834        | 424.7119        | 408.7944        | 814.6743        | 989.3727        | 901.0677        | 414.8966        | 8.583867        | 901.7049        | 87.35091        | 0.000656378        | 0                  | 2.173324625        |
| IMGA Medtr4g108150.1 | Mtr.37275.1.S1_at          | 1038.515        | 745.6983        | 1303.497        | 3359.599        | 3404.58         | 4321.127        | 1029.237        | 279.0151        | 3695.102        | 542.6198        | 0.001634449        | 0                  | 3.590137829        |
|                      | Mtr.37276.1.S1_at          | 6.135126        | 8.930318        | 5.977789        | 10.29493        | 16.92189        | 69.99632        | 7.014411        | 1.661088        | 32.40438        | 32.72376        | 0.250664858        | 1.9147E-154        | 4.619686291        |
| IMGA Medtr3g083130.1 | Mtr.37316.1.S1_at          | 789.3712        | 690.5723        | 1159.585        | 4712.925        | 3905.481        | 4371.193        | 879.843         | 247.2493        | 4329.866        | 405.3052        | 0.000229344        | 0                  | 4.921180848        |
|                      | Mtr.37376.1.S1_s_at        | 12.25979        | 13.74831        | 23.12368        | 50.73094        | 29.72748        | 46.97581        | 16.37726        | 5.889783        | 42.47807        | 11.20083        | 0.023326683        | 1.64585E-14        | 2.593723202        |

|                      |                          |                 |                 |                 |                 |                 |                 |                 |                 |                 |                 |                    |                    |                    |
|----------------------|--------------------------|-----------------|-----------------|-----------------|-----------------|-----------------|-----------------|-----------------|-----------------|-----------------|-----------------|--------------------|--------------------|--------------------|
| IMGA Medtr7g093870.1 | Mtr.37393.1.S1_at        | 18.48222        | 14.8738         | 17.82385        | 116.3723        | 156.3207        | 157.0633        | 17.05995        | 1.921669        | 143.2521        | 23.28156        | 0.0007267          | 0                  | 8.396980172        |
| IMGA Medtr2g045280.1 | Mtr.37395.1.S1_at        | 33.78652        | 12.94468        | 10.95492        | 113.9982        | 119.703         | 362.2439        | 19.22871        | 12.64663        | 198.6484        | 141.7066        | 0.094287341        | 2.4646E-133        | 10.33082426        |
|                      | Mtr.37425.1.S1_at        | 348.9067        | 442.8645        | 476.1337        | 880.1339        | 773.1509        | 1102.865        | 422.6349        | 65.98183        | 918.7166        | 168.2091        | 0.008935421        | 9.13135E-39        | 2.173782902        |
| IMGA Medtr3g089970.1 | Mtr.37441.1.S1_s_at      | 24.76271        | 23.18786        | 33.1299         | 57.01841        | 76.80465        | 46.67791        | 27.02682        | 5.343751        | 60.16699        | 15.30818        | 0.024009882        | 6.49161E-27        | 2.226195304        |
|                      | Mtr.37560.1.S1_at        | 16.16777        | 12.06213        | 27.22738        | 64.7597         | 67.79556        | 51.6428         | 18.48576        | 7.843856        | 61.39935        | 8.58469         | 0.003075325        | 0                  | 3.321440095        |
| IMGA Medtr4g093580.2 | Mtr.37568.1.S1_at        | 237.7355        | 285.9898        | 366.0045        | 880.4673        | 483.1001        | 724.7727        | 296.5766        | 64.78652        | 696.1134        | 200.2279        | 0.030263674        | 1.24232E-26        | 2.347162228        |
|                      | Mtr.37585.1.S1_a_at      | 7.515745        | 9.126064        | 6.683858        | 19.62933        | 24.29226        | 22.80882        | 7.775222        | 1.241607        | 22.24347        | 2.382317        | 0.000735191        | 0                  | 2.860814227        |
| IMGA Medtr7g088820.1 | Mtr.37657.1.S1_at        | 48.87242        | 41.4318         | 82.20149        | 871.3345        | 1108.398        | 1020.422        | 57.5019         | 21.71158        | 1000.051        | 119.8372        | 0.00017913         | 0                  | 17.391622268       |
| IMGA Medtr6g086170.1 | Mtr.37708.1.S1_at        | 32.58118        | 56.78096        | 32.43024        | 188.9419        | 202.7799        | 260.2416        | 40.59746        | 14.01553        | 217.3211        | 37.80874        | 0.001615442        | 9.7483E-106        | 5.353071576        |
|                      | Mtr.37718.1.S1_at        | 154.9756        | 113.5506        | 229.161         | 304.2524        | 332.6175        | 527.1449        | 165.8957        | 58.57373        | 388.0049        | 121.3305        | 0.04614385         | 5.10412E-11        | 2.338848423        |
|                      | Mtr.37724.1.S1_at        | 16.29376        | 10.46297        | 10.33094        | 71.82149        | 114.3833        | 101.7961        | 12.36256        | 3.40516         | 96.00031        | 21.86483        | 0.002814435        | 0                  | 7.765410015        |
|                      | Mtr.37724.1.S1_s_at      | 4.116225        | 6.224902        | 5.811345        | 84.25431        | 139.4902        | 111.0316        | 5.384157        | 1.117361        | 111.5921        | 27.62222        | 0.002648642        | 0                  | 20.72600194        |
| IMGA Medtr8g022810.1 | Mtr.37773.1.S1_at        | 84.82202        | 90.3486         | 147.4147        | 232.2093        | 307.2449        | 357.3125        | 107.5284        | 34.65286        | 298.9223        | 62.96549        | 0.009937179        | 1.10672E-21        | 2.779936875        |
|                      | Mtr.37779.1.S1_at        | 440.5316        | 490.865         | 494.7937        | 889.5516        | 1299.365        | 1534.168        | 475.3968        | 30.25793        | 1241.028        | 326.2439        | 0.015508717        | 0                  | 2.610510594        |
| IMGA Medtr3g083760.1 | Mtr.37781.1.S1_at        | 77.6739         | 63.1611         | 57.4594         | 96.23267        | 175.8407        | 140.7385        | 66.09814        | 10.42239        | 137.604         | 39.89649        | 0.039803139        | 1.4465E-32         | 2.081813408        |
|                      | Mtr.37869.1.S1_at        | 276.2466        | 328.8009        | 314.4967        | 1738.188        | 535.5316        | 745.358         | 306.5147        | 27.17119        | 1006.359        | 642.407         | 0.132478671        | 0                  | 3.283232751        |
| IMGA Medtr7g035060.1 | Mtr.37906.1.S1_at        | 117.0873        | 159.3216        | 170.7497        | 321.7286        | 280.865         | 315.7436        | 149.0529        | 28.26655        | 306.1124        | 22.06873        | 0.001619723        | 0                  | 2.053716467        |
| IMGA Medtr7g093950.1 | Mtr.37969.1.S1_at        | 61.70518        | 58.28514        | 37.11618        | 121.5954        | 106.8852        | 120.3207        | 52.36884        | 13.31941        | 116.2671        | 8.149934        | 0.002092079        | 0                  | 2.220157497        |
|                      | Mtr.37972.1.S1_at        | 47.26001        | 48.69832        | 48.86499        | 180.449         | 242.4432        | 195.6578        | 48.27444        | 0.882464        | 206.1833        | 32.30959        | 0.001068726        | 0                  | 4.271066028        |
|                      | Mtr.38079.1.S1_at        | 15.30218        | 15.64152        | 22.05979        | 38.91384        | 36.69393        | 41.57204        | 17.66783        | 3.807331        | 20.05993        | 2.442338        | 0.001209971        | 0                  | 2.210794203        |
| IMGA Medtr5g035610.1 | Mtr.38093.1.S1_at        | 10.17269        | 9.318778        | 6.858476        | 10.41682        | 190.365         | 11.75835        | 8.783315        | 1.720769        | 70.84671        | 103.508         | 0.35773223         | 0                  | 8.066056725        |
| IMGA Medtr8g045570.1 | Mtr.38110.1.S1_at        | 12.30727        | 14.10344        | 14.5869         | 260.7642        | 107.3595        | 193.6313        | 13.66587        | 1.201156        | 187.2517        | 76.90108        | 0.017405386        | 0                  | 13.70214192        |
| IMGA Medtr2g008160.3 | Mtr.38116.1.S1_at        | 4.154127        | 6.035374        | 5.545236        | 13.34335        | 21.31176        | 42.61229        | 5.244912        | 0.975919        | 25.7558         | 15.13208        | 0.079131008        | 4.0648E-290        | 4.910625707        |
| IMGA Medtr2g008160.2 | Mtr.38116.1.S1_s_at      | 12.54868        | 13.8545         | 11.21766        | 105.7102        | 142.2187        | 191.4635        | 12.54028        | 1.318439        | 146.4641        | 43.03399        | 0.005739076        | 0                  | 11.67949375        |
| IMGA Medtr3g086830.1 | Mtr.38121.1.S1_at        | 94.86102        | 101.0204        | 80.83397        | 181.3083        | 175.5535        | 203.9228        | 92.23847        | 10.34561        | 186.9282        | 14.99642        | 0.000843075        | 0                  | 2.026575179        |
|                      | Mtr.38171.1.S1_at        | 13.04095        | 14.07427        | 18.21923        | 29.32158        | 81.30389        | 66.24714        | 15.11148        | 2.740533        | 58.95753        | 26.74685        | 0.047607164        | 5.1271E-169        | 3.901505456        |
|                      | Mtr.38202.1.S1_at        | 13.22113        | 13.18562        | 19.1999         | 35.45164        | 35.49687        | 47.73979        | 15.20222        | 3.462143        | 39.56277        | 7.081543        | 0.005874617        | 3.64012E-34        | 2.602434158        |
|                      | Mtr.38252.1.S1_at        | 16.95988        | 10.6698         | 11.15752        | 46.54885        | 114.6396        | 122.3827        | 12.92907        | 3.499295        | 94.52372        | 41.72745        | 0.02791325         | 0                  | 7.310945093        |
| IMGA Medtr3g069190.1 | Mtr.38272.1.S1_at        | 103.3999        | 107.365         | 94.80107        | 220.4657        | 295.78          | 294.2128        | 101.8553        | 6.422791        | 270.1529        | 43.03746        | 0.002583477        | 0                  | 2.652319902        |
| IMGA Medtr5g020020.1 | Mtr.38274.1.S1_at        | 32.13217        | 28.908          | 32.4198         | 199.4459        | 168.859         | 159.995         | 31.15332        | 1.949822        | 176.1           | 20.69828        | 0.000269705        | 0                  | 5.652685794        |
| IMGA Medtr1g088660.1 | Mtr.38347.1.S1_at        | 46.25345        | 37.40681        | 44.74709        | 86.75794        | 74.53844        | 127.78          | 42.80245        | 4.73307         | 96.35878        | 27.88902        | 0.030522733        | 1.58542E-85        | 2.25124443         |
| IMGA Medtr4g098450.1 | Mtr.38359.1.S1_at        | 13.03055        | 14.51741        | 18.41612        | 45.28275        | 38.36645        | 36.90664        | 15.32136        | 2.781336        | 40.18528        | 4.474472        | 0.001219641        | 0                  | 2.622827599        |
|                      | Mtr.38500.1.S1_at        | 9.648972        | 7.752487        | 9.709732        | 29.84355        | 19.56162        | 47.57783        | 9.037064        | 1.112891        | 32.32767        | 14.17234        | 0.046977401        | 1.0899E-287        | 3.577231262        |
| IMGA Medtr3g114750.1 | Mtr.38513.1.S1_at        | 15.54276        | 16.89893        | 12.01859        | 33.23098        | 33.82431        | 37.46572        | 14.8201         | 2.519149        | 34.84033        | 2.29292         | 0.000524543        | 0                  | 2.35088463         |
| IMGA Medtr3g101290.1 | Mtr.38547.1.S1_at        | 22.2115         | 57.79518        | 30.68241        | 96.65501        | 91.7716         | 78.19831        | 36.89636        | 18.58789        | 88.87497        | 9.563224        | 0.012577076        | 0                  | 2.408773333        |
| IMGA Medtr5g017850.1 | Mtr.38635.1.S1_at        | 21.39663        | 24.36451        | 19.12032        | 80.66583        | 62.16779        | 106.5124        | 21.62715        | 2.629685        | 83.11534        | 22.27355        | 0.008980775        | 0                  | 3.843100982        |
|                      | Mtr.38695.1.S1_at        | 9.98712         | 9.6764          | 10.05032        | 20.30723        | 24.94818        | 37.49419        | 9.904613        | 0.200148        | 27.5832         | 8.89131         | 0.02622257         | 0                  | 2.784884074        |
| IMGA Medtr5g012000.1 | Mtr.38812.1.S1_at        | 190.9075        | 242.9547        | 179.5423        | 511.865         | 581.0316        | 800.0499        | 204.4682        | 33.81128        | 630.9822        | 150.4458        | 0.008706034        | 7.9388E-106        | 3.08596771         |
|                      | <b>Mtr.38883.1.S1_at</b> | <b>44.36502</b> | <b>63.99436</b> | <b>75.90876</b> | <b>150.8617</b> | <b>235.2527</b> | <b>315.3163</b> | <b>61.42271</b> | <b>15.92834</b> | <b>233.8103</b> | <b>82.23679</b> | <b>0.023490348</b> | <b>2.10848E-78</b> | <b>3.806576493</b> |
| IMGA AC233577_31.1   | Mtr.38932.1.S1_at        | 2397.093        | 2288.986        | 2300.654        | 5049.615        | 4161.697        | 5459.379        | 2328.911        | 59.33489        | 4890.23         | 663.3608        | 0.002638662        | 0                  | 2.099792952        |
| IMGA Medtr1g042820.1 | Mtr.39059.1.S1_at        | 60.84784        | 90.77781        | 92.62179        | 152.3481        | 160.4188        | 204.3932        | 81.41581        | 17.83623        | 172.3867        | 28.01066        | 0.009004519        | 1.00953E-18        | 2.117361365        |
| IMGA AC233577_31.1   | Mtr.39132.1.S1_at        | 433.5328        | 413.8149        | 442.8309        | 1081.032        | 801.6844        | 935.9447        | 430.0595        | 14.81655        | 939.5536        | 139.7086        | 0.00328036         | 0                  | 2.184705752        |
|                      | Mtr.39165.1.S1_at        | 85.65669        | 54.62668        | 140.3524        | 381.9129        | 162.173         | 351.0158        | 93.54525        | 43.40387        | 298.3672        | 118.955         | 0.048729636        | 2.9954E-16         | 3.189549783        |
|                      | Mtr.39214.1.S1_at        | 12.4982         | 21.67785        | 12.15248        | 67.77471        | 80.03165        | 138.6291        | 15.44284        | 5.402438        | 95.47847        | 37.86869        | 0.02227797         | 3.2849E-145        | 6.182700366        |
| IMGA Medtr5g064240.1 | Mtr.39322.1.S1_at        | 1137.935        | 1159.418        | 1491.287        | 2501.351        | 2303.198        | 2773.384        | 1262.88         | 198.0974        | 2525.978        | 236.0582        | 0.002079352        | 0                  | 2.000172687        |
|                      | Mtr.39456.1.S1_at        | 10.31827        | 10.19191        | 10.32432        | 27.52149        | 19.16468        | 22.62092        | 10.27817        | 0.074761        | 23.10236        | 4.199159        | 0.006133344        | 0                  | 2.247711639        |
| IMGA Medtr3g096410.1 | Mtr.39643.1.S1_at        | 22.52083        | 19.14705        | 15.00937        | 70.25524        | 54.39954        | 83.1161         | 18.89242        | 3.762194        | 69.25696        | 14.38428        | 0.004213894        | 6.1679E-119        | 3.665860476        |
| IMGA Medtr5g063200.1 | Mtr.39659.1.S1_at        | 184.6233        | 202.3595        | 206.5214        | 470.4776        | 431.9841        | 463.383         | 197.8347        | 11.62914        | 455.2815        | 20.48565        | 4.58721E-05        | 0                  | 2.301322518        |
| IMGA Medtr2g086880.1 | <b>Mtr.39754.1.S1_at</b> | <b>21.52018</b> | <b>25.19041</b> | <b>21.71356</b> | <b>57.69465</b> | <b>41.18799</b> | <b>55.5952</b>  | <b>22.80805</b> | <b>2.065451</b> | <b>51.49261</b> | <b>8.985592</b> | <b>0.005735346</b> | <b>7.547E-128</b>  | <b>2.257650943</b> |
| IMGA Medtr1g083290.1 | Mtr.39812.1.S1_s_at      | 47.98632        | 56.41616        | 68.35637        | 236.8147        | 198.644         | 281.7559        | 57.58628        | 10.23531        | 239.0716        | 41.60187        | 0.0018369          | 3.9985E-207        | 4.15153655         |



|                      |                     |          |          |          |          |          |          |          |          |          |          |             |             |              |
|----------------------|---------------------|----------|----------|----------|----------|----------|----------|----------|----------|----------|----------|-------------|-------------|--------------|
|                      | Mtr.39820.1.S1_at   | 18.56997 | 16.61219 | 22.40687 | 44.50604 | 74.56945 | 98.73294 | 19.19634 | 2.947683 | 72.60281 | 27.16689 | 0.027654523 | 3.6327E-216 | 3.782116279  |
|                      | Mtr.39861.1.S1_at   | 29.53538 | 26.26975 | 37.36008 | 89.81152 | 64.36498 | 122.5047 | 31.05507 | 5.699206 | 92.22706 | 29.14502 | 0.023421836 | 3.81324E-77 | 2.969790921  |
|                      | Mtr.39929.1.S1_at   | 46.91311 | 58.25038 | 13.60913 | 142.9088 | 184.1734 | 72.43063 | 39.59088 | 23.20391 | 133.171  | 56.50427 | 0.056772761 | 2.84322E-12 | 3.363678136  |
| IMGA Medtr8g020630.1 | Mtr.40021.1.S1_at   | 48.1539  | 74.22485 | 66.72545 | 243.3933 | 423.6252 | 455.9668 | 63.03473 | 13.42161 | 374.3284 | 114.5404 | 0.009480709 | 0           | 5.938447184  |
|                      | Mtr.40041.1.S1_at   | 7.665786 | 5.612967 | 9.526719 | 27.85491 | 24.58882 | 31.56909 | 7.601824 | 1.95766  | 28.00428 | 3.492532 | 0.000909445 | 0           | 3.683889112  |
| IMGA Medtr7g072420.1 | Mtr.40048.1.S1_at   | 203.3997 | 204.9721 | 380.7369 | 689.8037 | 649.7324 | 1104.875 | 263.0362 | 101.9348 | 814.8039 | 252.0071 | 0.024547319 | 6.88483E-21 | 3.097687076  |
|                      | Mtr.40058.1.S1_x_at | 189.6822 | 160.3842 | 145.125  | 1047.481 | 2312.485 | 1170.014 | 165.0638 | 22.64419 | 1509.993 | 697.6735 | 0.028911645 | 0           | 9.147935951  |
|                      | Mtr.40066.1.S1_at   | 14.5597  | 10.35004 | 10.04051 | 217.6691 | 534.2694 | 603.9153 | 11.65008 | 2.52455  | 451.9513 | 205.861  | 0.020757571 | 0           | 38.79383087  |
|                      | Mtr.40069.1.S1_at   | 41.07693 | 40.77352 | 40.61099 | 82.2468  | 88.33778 | 96.16467 | 40.82048 | 0.236492 | 88.91642 | 6.976953 | 0.000282535 | 0           | 2.17823048   |
| IMGA Medtr8g045520.1 | Mtr.40106.1.S1_s_at | 88.36498 | 111.1638 | 102.3175 | 193.2912 | 338.789  | 193.9208 | 100.6154 | 11.49433 | 242.0003 | 83.82205 | 0.044366029 | 1.0218E-100 | 2.405200962  |
| IMGA Medtr7g072480.1 | Mtr.40120.1.S1_at   | 5.158958 | 5.491681 | 4.732966 | 10.71875 | 70.16478 | 53.34328 | 5.127868 | 0.380312 | 44.74227 | 30.64214 | 0.088716655 | 0           | 8.725315945  |
| IMGA Medtr2g035100.1 | Mtr.40147.1.S1_s_at | 77.28804 | 29.54136 | 65.1869  | 608.1487 | 569.2039 | 811.3353 | 57.33877 | 24.82199 | 662.896  | 130.0187 | 0.001372916 | 0           | 11.56104319  |
| IMGA Medtr5g030620.1 | Mtr.40239.1.S1_at   | 780.9997 | 829.2471 | 901.8815 | 3483.102 | 3984.501 | 5564.666 | 837.3761 | 60.8495  | 4344.09  | 1086.372 | 0.005050149 | 0           | 5.187740427  |
| IMGA Medtr7g065590.1 | Mtr.40278.1.S1_at   | 37.17339 | 27.79895 | 29.69033 | 120.5548 | 117.0167 | 123.0434 | 31.55422 | 4.957376 | 120.2049 | 3.028544 | 1.21768E-05 | 0           | 3.809472308  |
| IMGA Medtr4g057450.1 | Mtr.40322.1.S1_at   | 118.5634 | 161.9538 | 121.2943 | 791.6703 | 720.2998 | 675.3798 | 133.9372 | 24.30148 | 729.1167 | 58.64444 | 8.41336E-05 | 0           | 5.443721669  |
| IMGA Medtr1g093120.1 | Mtr.40329.1.S1_at   | 12.48837 | 17.4637  | 10.5481  | 36.69929 | 47.69832 | 48.39362 | 13.50006 | 3.567071 | 44.26375 | 6.560227 | 0.002039782 | 1.87086E-50 | 3.278782642  |
|                      | Mtr.40333.1.S1_x_at | 76.89815 | 87.10835 | 111.8262 | 251.9561 | 175.0722 | 248.3994 | 91.94424 | 17.95917 | 225.1426 | 43.39864 | 0.007974933 | 9.03905E-38 | 2.448686095  |
|                      | Mtr.4034.1.S1_at    | 35.43508 | 62.07787 | 30.54387 | 83.75807 | 106.8939 | 96.53514 | 42.68561 | 16.97133 | 95.72904 | 11.58896 | 0.011069524 | 2.22045E-15 | 2.242653693  |
|                      | Mtr.40344.1.S1_at   | 31.09213 | 78.34506 | 116.2929 | 103.3184 | 426.5218 | 257.5926 | 75.24338 | 42.68501 | 262.4776 | 161.657  | 0.124432065 | 3.01914E-14 | 3.488381538  |
| IMGA Medtr1g088640.1 | Mtr.40363.1.S1_at   | 164.6316 | 132.9231 | 152.0395 | 469.5334 | 438.9035 | 672.7684 | 149.8647 | 15.9657  | 172.0684 | 127.1059 | 0.006982529 | 0           | 3.516960882  |
|                      | Mtr.40399.1.S1_at   | 8.639519 | 5.701231 | 15.62    | 154.1298 | 260.8396 | 240.4117 | 9.986915 | 5.094809 | 218.4604 | 56.6405  | 0.003152134 | 0           | 21.87465946  |
| IMGA AC146550_1005.1 | Mtr.40419.1.S1_at   | 119.7264 | 117.0316 | 93.14477 | 227.0316 | 193.5039 | 290.365  | 109.9676 | 14.63117 | 236.9668 | 49.1889  | 0.012783329 | 4.37817E-51 | 2.154878602  |
|                      | Mtr.40420.1.S1_at   | 341.4676 | 306.8392 | 212.7181 | 594.2312 | 877.1496 | 619.343  | 287.0083 | 66.62625 | 696.9079 | 156.598  | 0.014010748 | 1.63539E-26 | 2.428180451  |
|                      | Mtr.40475.1.S1_at   | 32.70806 | 64.09136 | 37.95029 | 229.1899 | 139.2032 | 102.4042 | 44.91657 | 16.81144 | 156.9324 | 65.22575 | 0.044994448 | 8.21792E-31 | 3.493864903  |
| IMGA Medtr7g077340.1 | Mtr.40476.1.S1_at   | 30.56049 | 31.12755 | 40.39833 | 59.15743 | 78.89479 | 112.1794 | 34.02879 | 5.523462 | 83.41056 | 26.7979  | 0.035320641 | 4.37037E-54 | 2.451176179  |
| IMGA Medtr6g091680.1 | Mtr.40504.1.S1_at   | 79.55843 | 69.36498 | 132.7084 | 962.6712 | 650.4243 | 569.4473 | 93.87727 | 30.01277 | 727.5143 | 207.6377 | 0.006444692 | 2.0295E-228 | 7.749631765  |
|                      | Mtr.40506.1.S1_at   | 109.2814 | 120.5842 | 132.116  | 341.5678 | 253.4762 | 348.4003 | 120.6606 | 11.41751 | 314.4814 | 52.94243 | 0.003444868 | 5.0486E-190 | 2.606331946  |
|                      | Mtr.40509.1.S1_at   | 8.389205 | 6.327177 | 17.57027 | 31.097   | 20.23174 | 106.5296 | 10.76222 | 5.985415 | 52.61945 | 47.00258 | 0.20073771  | 9.06039E-34 | 4.889275863  |
|                      | Mtr.40517.1.S1_s_at | 74.83664 | 49.15777 | 57.33784 | 141.9402 | 210.5457 | 152.6038 | 60.44408 | 13.11822 | 168.3633 | 36.91811 | 0.008834251 | 4.54772E-46 | 2.785438238  |
|                      | Mtr.40518.1.S1_at   | 14.36453 | 11.47832 | 10.96993 | 41.71877 | 99.96164 | 47.54304 | 12.27093 | 1.830846 | 63.07448 | 32.07767 | 0.051974634 | 0           | 5.140155764  |
| IMGA Medtr4g013930.1 | Mtr.40553.1.S1_at   | 24.53559 | 8.684243 | 16.23012 | 167.5316 | 301.2461 | 173.4538 | 16.48332 | 7.928704 | 214.0772 | 75.54854 | 0.010778247 | 0           | 12.987506636 |
|                      | Mtr.40588.1.S1_at   | 134.561  | 170.6796 | 213.506  | 491.1134 | 400.3532 | 469.1668 | 172.9155 | 39.51995 | 453.5445 | 47.35393 | 0.001401753 | 0           | 2.622924932  |
| IMGA Medtr1g093100.1 | Mtr.40605.1.S1_at   | 124.7744 | 111.1664 | 125.6055 | 488.5575 | 665.4763 | 437.1023 | 120.5155 | 8.10714  | 530.3787 | 119.7933 | 0.004096922 | 0           | 4.400918495  |
|                      | Mtr.40613.1.S1_at   | 146.2729 | 164.9437 | 172.5546 | 586.8967 | 473.2227 | 747.7202 | 161.2571 | 13.52315 | 602.6132 | 137.922  | 0.005271917 | 0           | 3.736972518  |
|                      | Mtr.40631.1.S1_at   | 45.365   | 38.15929 | 43.9468  | 92.75501 | 60.16822 | 118.1743 | 42.49036 | 3.817263 | 90.36584 | 29.07675 | 0.0474607   | 1.2426E-104 | 2.126737326  |
| IMGA Medtr3g078640.1 | Mtr.40678.1.S1_at   | 268.5188 | 304.5316 | 306.5264 | 563.6912 | 714.8313 | 731.7072 | 293.1923 | 21.39111 | 670.0766 | 92.51802 | 0.002345877 | 1.5725E-204 | 2.285450765  |
| IMGA Medtr3g101320.1 | Mtr.40696.1.S1_at   | 142.5316 | 135.1027 | 137.8967 | 336.2713 | 326.1722 | 322.6225 | 138.5104 | 3.752298 | 328.3553 | 7.081455 | 2.10876E-06 | 0           | 2.370619565  |
| IMGA Medtr1g081660.1 | Mtr.40711.1.S1_at   | 25.25278 | 29.13526 | 26.6042  | 127.2201 | 230.8434 | 214.11   | 26.99741 | 1.970882 | 190.7245 | 55.62922 | 0.007009176 | 0           | 7.064547665  |
|                      | Mtr.40765.1.S1_at   | 8.823809 | 9.126064 | 9.140121 | 57.10416 | 10.77582 | 32.36467 | 9.029998 | 0.178703 | 33.41488 | 23.18202 | 0.142567264 | 0           | 3.700430388  |
| IMGA Medtr5g006950.1 | Mtr.40769.1.S1_at   | 16.11017 | 18.82003 | 18.28251 | 71.22379 | 85.36498 | 84.05159 | 17.73757 | 1.434768 | 80.21345 | 7.812924 | 0.000168143 | 0           | 4.52223533   |
| IMGA Medtr7g092540.1 | Mtr.4083.1.S1_at    | 10.44006 | 13.84334 | 20.03676 | 28.21736 | 28.8988  | 35.0203  | 14.77338 | 4.86548  | 30.71216 | 3.746489 | 0.010858673 | 1.72307E-13 | 2.078884322  |
| IMGA Medtr7g092540.1 | Mtr.4083.1.S1_s_at  | 24.53199 | 16.90922 | 47.7414  | 66.52445 | 82.58281 | 80.67086 | 29.72754 | 16.0593  | 76.59271 | 8.771614 | 0.011369155 | 0           | 2.576490217  |
| IMGA Medtr3g088150.1 | Mtr.40882.1.S1_at   | 318.865  | 292.2134 | 255.0119 | 565.153  | 484.7809 | 747.365  | 288.6967 | 32.07148 | 599.0996 | 134.5432 | 0.017734423 | 4.50497E-63 | 2.075186668  |
| IMGA Medtr2g008710.2 | Mtr.40911.1.S1_s_at | 387.2835 | 344.2252 | 415.6736 | 920.6983 | 1063.651 | 913.8129 | 382.3941 | 35.97428 | 966.054  | 84.59134 | 0.000388507 | 0           | 2.526330935  |
|                      | Mtr.40959.1.S1_at   | 47.73323 | 41.90129 | 56.82374 | 315.5004 | 113.375  | 415.8479 | 48.81942 | 7.520291 | 281.5744 | 154.0639 | 0.059194683 | 0           | 5.767672021  |
| IMGA Medtr5g020800.1 | Mtr.410.1.S1_s_at   | 126.8057 | 145.4174 | 226.7699 | 838.7786 | 556.7987 | 599.3938 | 166.331  | 53.16246 | 664.9904 | 152.0044 | 0.005832552 | 2.36525E-59 | 3.99799398   |
| IMGA Medtr4g069810.1 | Mtr.41019.1.S1_at   | 6.310247 | 15.34715 | 12.53493 | 24.78753 | 42.06185 | 42.45537 | 11.39744 | 4.624589 | 36.43492 | 10.08885 | 0.017431043 | 6.76894E-21 | 3.196762689  |
| IMGA Medtr3g100470.1 | Mtr.41053.1.S1_at   | 831.9686 | 885.6983 | 857.3988 | 2222.365 | 2318.09  | 2769.033 | 858.3553 | 26.87761 | 2436.496 | 291.936  | 0.000736571 | 0           | 2.838563861  |
|                      | Mtr.41059.1.S1_at   | 37.32047 | 58.84385 | 67.27872 | 164.8299 | 126.9301 | 177.1867 | 54.48101 | 15.4483  | 156.3155 | 26.18781 | 0.004391505 | 3.41527E-30 | 2.869174338  |
| IMGA Medtr7g065260.1 | Mtr.41149.1.S1_at   | 16.39238 | 13.11352 | 17.40358 | 122.9875 | 119.6293 | 122.628  | 15.63649 | 2.242691 | 121.7483 | 1.843899 | 3.73034E-07 | 0           | 7.786161915  |

|                             |                          |                 |                |                 |                |                 |                 |                 |                 |                 |                 |                    |                    |                    |
|-----------------------------|--------------------------|-----------------|----------------|-----------------|----------------|-----------------|-----------------|-----------------|-----------------|-----------------|-----------------|--------------------|--------------------|--------------------|
| IMGA Medtr4g127930.1        | Mtr.41159.1.S1_at        | 78.15696        | 157.9843       | 135.9724        | 353.243        | 379.187         | 397.806         | 124.0379        | 41.23016        | 376.7453        | 22.38159        | 0.000734637        | 0                  | 3.037340626        |
|                             | Mtr.41238.1.S1_at        | 12.57002        | 9.026404       | 14.07079        | 33.86814       | 49.0697         | 39.05176        | 11.88907        | 2.590216        | 40.6632         | 7.727829        | 0.003621505        | 1.68353E-82        | 3.420217152        |
| IMGA Medtr4g127530.1        | Mtr.41282.1.S1_s_at      | 53.0335         | 56.8737        | 50.84726        | 99.9858        | 130.365         | 115.3046        | 53.58482        | 3.050812        | 115.2185        | 15.18977        | 0.00232564         | 3.0378E-268        | 2.150207432        |
|                             | Mtr.41355.1.S1_at        | 20.60956        | 21.67906       | 19.02923        | 63.4484        | 50.36681        | 71.71145        | 20.43928        | 1.333096        | 61.84222        | 10.76259        | 0.002711448        | 0                  | 3.025654828        |
| IMGA Medtr2g035170.1        | Mtr.41478.1.S1_at        | 162.8911        | 130.2459       | 225.3548        | 526.0323       | 405.0292        | 482.4438        | 172.8306        | 48.32722        | 471.1685        | 61.2845         | 0.002698821        | 0                  | 2.726186487        |
| IMGA AC233685_102.1         | Mtr.41727.1.S1_at        | 27.14518        | 44.41395       | 29.03905        | 55.2536        | 75.22553        | 74.03656        | 33.53273        | 9.470875        | 68.1719         | 11.20336        | 0.014978492        | 2.37539E-10        | 2.032995905        |
|                             | Mtr.41872.1.S1_at        | 21.71056        | 24.85713       | 18.72783        | 79.65895       | 59.29739        | 59.56862        | 21.76517        | 3.065014        | 66.17499        | 11.67824        | 0.003113112        | 5.4907E-139        | 3.040406874        |
|                             | Mtr.41930.1.S1_at        | 23.0593         | 20.34346       | 24.7807         | 89.69831       | 43.49165        | 123.1983        | 22.72782        | 2.237114        | 85.46276        | 40.02178        | 0.053493442        | 0                  | 3.760270761        |
| IMGA Medtr3g094630.1        | Mtr.42141.1.S1_s_at      | 20.34135        | 16.6791        | 12.88861        | 39.30075       | 48.79125        | 57.3278         | 16.63635        | 3.726555        | 48.47327        | 9.017728        | 0.004829471        | 1.52443E-49        | 2.913695504        |
|                             | Mtr.42258.1.S1_at        | 97.76064        | 127.0548       | 95.53165        | 187.6064       | 204.2054        | 291.5316        | 106.7824        | 17.59179        | 227.7812        | 55.82987        | 0.023161413        | 1.00917E-32        | 2.133134716        |
|                             | Mtr.42268.1.S1_at        | 123.0703        | 97.32044       | 76.44371        | 401.3924       | 311.9861        | 624.8338        | 98.94481        | 23.35569        | 446.0708        | 161.1383        | 0.020970555        | 3.8861E-146        | 4.508278384        |
|                             | Mtr.42416.1.S1_at        | 11.27856        | 5.881525       | 11.2678         | 29.69818       | 22.22573        | 40.41916        | 9.475962        | 3.112878        | 30.78102        | 9.144921        | 0.018779193        | 2.04163E-32        | 3.248327127        |
|                             | Mtr.42847.1.S1_at        | 1133.115        | 1877.513       | 1506.774        | 3245.793       | 3506.969        | 3624.025        | 1505.801        | 372.1999        | 3458.929        | 193.6382        | 0.001284932        | 0                  | 2.2970694          |
| IMGA Medtr3g072980.1        | Mtr.42916.1.S1_at        | 20.14282        | 7.147873       | 9.256912        | 170.5087       | 110.0421        | 144.8186        | 12.18253        | 6.973995        | 141.7898        | 30.34691        | 0.001962469        | 2.5126E-227        | 11.63877558        |
| IMGA Medtr2g035150.1        | Mtr.42966.1.S1_at        | 14.42694        | 17.80529       | 11.16009        | 116.0592       | 85.56017        | 92.41984        | 14.46411        | 3.322754        | 98.01306        | 16.00032        | 0.000898018        | 0                  | 6.77629516         |
| IMGA Medtr1g079490.1        | Mtr.42985.1.S1_at        | 18.04374        | 16.25536       | 10.25774        | 46.85019       | 168.6647        | 287.5466        | 14.85228        | 4.078225        | 167.6872        | 120.3512        | 0.092830271        | 0                  | 11.29033169        |
| IMGA Medtr5g010640.1        | Mtr.42989.1.S1_at        | 702.17          | 754.2489       | 1156.508        | 5608.18        | 8824.961        | 9343.556        | 870.9756        | 248.6454        | 7925.566        | 2023.597        | 0.003898847        | 0                  | 9.09964185         |
|                             | Mtr.43009.1.S1_s_at      | 13.32789        | 12.04529       | 60.36067        | 186.2972       | 135.7586        | 314.3258        | 28.57795        | 27.53211        | 212.1272        | 92.04323        | 0.029678746        | 7.63344E-31        | 7.422759241        |
| IMGA Medtr7g021850.1        | Mtr.43023.1.S1_at        | 27.22738        | 28.52561       | 39.79098        | 153.1132       | 91.86498        | 69.86498        | 31.84799        | 6.909391        | 104.9477        | 43.13858        | 0.044203001        | 5.25895E-75        | 3.295269857        |
|                             | Mtr.43048.1.S1_at        | 11.39794        | 13.36931       | 17.72976        | 31.6169        | 175.8574        | 62.57476        | 14.16567        | 3.24016         | 90.01636        | 75.93492        | 0.158950701        | 0                  | 6.354542621        |
|                             | Mtr.4306.1.S1_s_at       | 20.918          | 33.1693        | 54.65712        | 51.69831       | 188.3541        | 160.5316        | 36.24814        | 17.07898        | 133.528         | 72.2191         | 0.085683678        | 5.87058E-23        | 3.683720553        |
| IMGA Medtr3g055120.1        | Mtr.43078.1.S1_at        | 18.86062        | 37.69896       | 38.32617        | 60.29198       | 73.37582        | 59.53165        | 31.62858        | 11.06182        | 64.39982        | 7.78274         | 0.013732531        | 3.02647E-13        | 2.03612726         |
|                             | Mtr.43146.1.S1_at        | 171.7751        | 233.973        | 435.4639        | 1104.615       | 792.5654        | 1782.698        | 280.404         | 137.8399        | 1226.626        | 506.2172        | 0.03539585         | 1.33534E-32        | 4.374496434        |
| IMGA Medtr2g084000.1        | Mtr.43159.1.S1_at        | 59.00946        | 100.4649       | 70.15981        | 615.0442       | 922.5762        | 1116.033        | 76.54472        | 21.45259        | 884.5512        | 252.6499        | 0.005260634        | 0                  | 11.55600606        |
| IMGA Medtr5g016450.2        | Mtr.43175.1.S1_s_at      | 187.356         | 175.0292       | 176.8934        | 362.8672       | 509.1983        | 438.1843        | 179.7595        | 6.644443        | 436.75          | 73.17608        | 0.003748043        | 0                  | 2.429634256        |
| IMGA Medtr7g065150.1        | Mtr.43230.1.S1_at        | 713.2393        | 568.8513       | 465.3384        | 1147.865       | 1199.038        | 1507.695        | 582.4763        | 124.5108        | 1284.866        | 194.6646        | 0.006234248        | 1.50206E-22        | 2.20586851         |
| IMGA Medtr7g065150.1        | Mtr.43231.1.S1_s_at      | 388.865         | 299.5367       | 233.1071        | 695.2753       | 641.8011        | 848.4524        | 307.1696        | 78.15896        | 728.5096        | 107.2594        | 0.005332155        | 9.89575E-21        | 2.371685199        |
|                             | Mtr.43254.1.S1_at        | 35.67221        | 37.69896       | 63.19831        | 115.134        | 74.34408        | 120.5269        | 45.52316        | 15.34064        | 103.335         | 25.25126        | 0.027553763        | 6.69631E-11        | 2.269943487        |
|                             | Mtr.43259.1.S1_at        | 20.79776        | 23.34974       | 26.2624         | 131.9594       | 104.5798        | 162.7488        | 23.46997        | 2.7343          | 133.096         | 29.10112        | 0.00289637         | 0                  | 5.670906994        |
|                             | Mtr.43278.1.S1_at        | 140.5169        | 149.9325       | 137.0873        | 291.6531       | 285.9719        | 285.1019        | 142.5122        | 6.651033        | 287.5756        | 3.557909        | 4.84418E-06        | 0                  | 2.01790114         |
|                             | Mtr.43284.1.S1_at        | 16.05452        | 15.4479        | 27.02278        | 91.78306       | 64.58843        | 78.06458        | 19.5084         | 6.514711        | 78.14536        | 13.59749        | 0.002530977        | 8.55926E-55        | 4.005728438        |
|                             | Mtr.43294.1.S1_at        | 1978.691        | 1016.71        | 1402.034        | 2606.111       | 4706.006        | 3311.824        | 1465.812        | 484.1511        | 3541.314        | 1068.592        | 0.037501464        | 1.12686E-13        | 2.415940762        |
| IMGA Medtr1g087920.1        | Mtr.43313.1.S1_at        | 202.2595        | 184.865        | 228.7882        | 522.835        | 1089.714        | 565.865         | 205.3042        | 22.11934        | 726.1379        | 315.6001        | 0.046330058        | 0                  | 3.536887436        |
| IMGA Medtr7g038050.1        | Mtr.43323.1.S1_at        | 23.29658        | 21.61082       | 24.42585        | 56.69831       | 33.59702        | 68.58382        | 23.11108        | 1.41665         | 52.95972        | 17.7905         | 0.044258046        | 1.4066E-291        | 2.29152896         |
| IMGA Medtr5g077510.1        | Mtr.43363.1.S1_at        | 26.2383         | 33.02616       | 36.62856        | 94.52274       | 96.56862        | 98.36498        | 31.96434        | 5.275887        | 96.48545        | 1.92247         | 3.76096E-05        | 0                  | 3.018534271        |
| IMGA Medtr3g092430.1        | Mtr.43392.1.S1_s_at      | 22.5981         | 25.64592       | 33.52523        | 54.78024       | 64.8287         | 83.36498        | 27.25642        | 5.638781        | 67.65797        | 14.50088        | 0.010841924        | 2.3055E-35         | 2.482276852        |
| IMGA Medtr7g023690.1        | Mtr.43467.1.S1_at        | 145.148         | 79.35044       | 160.0485        | 905.5506       | 1793.554        | 1597.753        | 128.1823        | 42.94089        | 1432.286        | 466.5532        | 0.008516642        | 0                  | 11.1738179         |
| <b>IMGA Medtr3g117420.1</b> | <b>Mtr.43497.1.S1_at</b> | <b>112.1983</b> | <b>115.399</b> | <b>175.0316</b> | <b>282.355</b> | <b>203.9552</b> | <b>324.4914</b> | <b>134.2097</b> | <b>35.38908</b> | <b>270.2672</b> | <b>61.17052</b> | <b>0.028979957</b> | <b>2.75554E-11</b> | <b>2.013768711</b> |
| IMGA Medtr7g072760.1        | Mtr.43563.1.S1_at        | 98.27652        | 70.53165       | 99.56104        | 193.0156       | 160.3362        | 240.1613        | 89.4564         | 16.4019         | 197.8377        | 40.1304         | 0.012348821        | 2.48727E-30        | 2.211554396        |
|                             | Mtr.43594.1.S1_at        | 7.502404        | 7.302674       | 7.989109        | 20.82979       | 13.27337        | 21.34945        | 7.598062        | 0.353074        | 18.4842         | 4.520192        | 0.014160155        | 0                  | 2.432752307        |
|                             | Mtr.43656.1.S1_at        | 151.5511        | 182.7906       | 96.9585         | 446.8651       | 764.828         | 680.788         | 143.7667        | 43.44233        | 630.827         | 164.764         | 0.007756055        | 5.3161E-84         | 4.38785076         |
| IMGA Medtr3g109490.1        | Mtr.43680.1.S1_at        | 35.79086        | 23.2357        | 28.32435        | 50.61004       | 133.1939        | 172.7589        | 29.11697        | 6.314999        | 118.8543        | 62.3242         | 0.068124641        | 9.2275E-134        | 4.081959141        |
|                             | Mtr.43715.1.S1_at        | 26.76612        | 55.25121       | 36.94422        | 87.02371       | 61.19831        | 100.0796        | 39.65385        | 14.43456        | 82.7672         | 19.78703        | 0.038070257        | 2.29981E-07        | 2.087242525        |
|                             | Mtr.43895.1.S1_at        | 13.00287        | 13.56633       | 12.60635        | 44.34725       | 57.90361        | 63.81126        | 13.05852        | 0.482403        | 55.35404        | 9.979333        | 0.001841382        | 0                  | 4.238922243        |
| IMGA Medtr4g069770.1        | Mtr.43908.1.S1_at        | 69.59262        | 90.44767       | 59.90426        | 137.7143       | 197.8986        | 193.0904        | 73.31485        | 15.60821        | 176.2344        | 33.44592        | 0.008462396        | 3.28301E-30        | 2.403802492        |
| IMGA Medtr5g020800.1        | Mtr.43916.1.S1_at        | 14.95275        | 19.50948       | 21.74522        | 51.63354       | 104.2787        | 75.3491         | 18.73582        | 3.461692        | 77.08712        | 26.36559        | 0.01909235         | 2.1874E-187        | 4.114425164        |
| IMGA Medtr5g013030.1        | Mtr.43917.1.S1_at        | 26.41435        | 29.68309       | 35.07868        | 178.4265       | 64.12355        | 177.6753        | 30.39204        | 4.375456        | 140.0751        | 65.77705        | 0.044930706        | 0                  | 4.608940919        |
| IMGA Medtr5g019120.3        | Mtr.43942.1.S1_s_at      | 280.9991        | 244.9578       | 274.9222        | 1181.341       | 969.6592        | 1704.651        | 266.9597        | 19.29493        | 1285.217        | 378.346         | 0.009621936        | 0                  | 4.814273844        |
| IMGA Medtr5g062190.1        | Mtr.43944.1.S1_at        | 244.0288        | 395.5417       | 320.6363        | 803.782        | 851.9199        | 970.3288        | 320.0689        | 75.75805        | 875.3435        | 85.70856        | 0.001095353        | 0                  | 2.734859405        |
| IMGA Medtr3g113710.2        | Mtr.43953.1.S1_at        | 154.365         | 116.2268       | 146.6933        | 334.365        | 205.4763        | 298.882         | 139.095         | 20.17253        | 279.5744        | 66.57822        | 0.024950547        | 1.68022E-33        | 2.009952945        |

|                      |                     |          |          |          |          |          |          |          |          |          |          |             |             |             |
|----------------------|---------------------|----------|----------|----------|----------|----------|----------|----------|----------|----------|----------|-------------|-------------|-------------|
| IMGA Medtr3g113710.2 | Mtr.43953.1.S1_s_at | 194.5316 | 179.2182 | 184.5898 | 466.3964 | 261.7357 | 408.4942 | 186.1132 | 7.769552 | 378.8754 | 105.4963 | 0.034307494 | 0           | 2.035725486 |
| IMGA Medtr3g113710.2 | Mtr.43954.1.S1_at   | 249.5418 | 224.2229 | 220.8603 | 610.9754 | 417.7122 | 569.9043 | 231.5417 | 15.67901 | 532.864  | 101.8168 | 0.007149357 | 5.9752E-243 | 2.301374075 |
| IMGA Medtr7g102560.1 | Mtr.43961.1.S1_at   | 33.3817  | 41.84205 | 60.25885 | 127.0619 | 202.5294 | 192.9085 | 45.16087 | 13.7425  | 174.1666 | 41.07651 | 0.006704187 | 1.91669E-59 | 3.856582258 |
|                      | Mtr.44028.1.S1_at   | 53.86498 | 54.60366 | 53.49534 | 97.04707 | 89.69831 | 139.2569 | 53.988   | 0.564307 | 108.6674 | 26.74486 | 0.024005605 | 0           | 2.012807187 |
|                      | Mtr.44069.1.S1_at   | 8.301508 | 12.01825 | 10.18506 | 45.365   | 78.58452 | 40.52661 | 10.16827 | 1.858425 | 54.82538 | 20.71775 | 0.020501251 | 0           | 5.391809299 |
| IMGA Medtr5g009970.2 | Mtr.44072.1.S1_at   | 8.620812 | 9.989682 | 9.162348 | 30.37514 | 14.90726 | 39.20157 | 9.257614 | 0.68939  | 28.16132 | 12.29753 | 0.056488793 | 0           | 3.041963368 |
|                      | Mtr.44094.1.S1_at   | 31.2422  | 41.03182 | 52.49288 | 108.2819 | 110.6158 | 94.84723 | 41.58896 | 10.63629 | 104.5816 | 8.510629 | 0.001317918 | 0           | 2.514648895 |
|                      | Mtr.44270.1.S1_at   | 428.275  | 396.4642 | 230.9129 | 979.0004 | 679.5624 | 697.8713 | 351.884  | 105.9646 | 785.478  | 167.8451 | 0.019377262 | 1.36716E-12 | 2.232206972 |
| IMGA Medtr3g052760.1 | Mtr.44271.1.S1_at   | 9.792328 | 12.91036 | 8.30109  | 22.62968 | 50.69832 | 20.88987 | 10.33459 | 2.351997 | 31.40596 | 16.7303  | 0.09686433  | 2.65289E-54 | 3.038915318 |
| IMGA Medtr5g026370.1 | Mtr.44280.1.S1_at   | 9.807027 | 10.16122 | 8.258097 | 31.71203 | 30.05482 | 30.10397 | 9.408782 | 1.012137 | 30.62361 | 0.94292  | 1.19378E-05 | 0           | 3.254789586 |
| IMGA Medtr1g110510.1 | Mtr.44300.1.S1_at   | 23.01614 | 61.32222 | 43.68775 | 64.84744 | 177.3558 | 170.0048 | 42.67537 | 19.1731  | 137.4027 | 62.94209 | 0.067225187 | 1.15409E-17 | 3.219718493 |
| IMGA AC146712_4.1    | Mtr.44326.1.S1_at   | 13.11922 | 10.68161 | 9.995406 | 71.8119  | 81.47757 | 77.69489 | 11.26541 | 1.641696 | 76.99479 | 4.87072  | 2.45939E-05 | 0           | 6.834617885 |
| IMGA Medtr8g046210.1 | Mtr.44354.1.S1_at   | 7.665786 | 9.279437 | 13.81991 | 25.25278 | 19.82167 | 16.90922 | 10.25505 | 3.190953 | 20.66122 | 4.234665 | 0.027295566 | 1.6189E-08  | 2.014737429 |
| IMGA Medtr5g019580.1 | Mtr.4441.1.S1_at    | 71.81594 | 49.90023 | 115.7325 | 170.7384 | 170.865  | 177.8232 | 79.14957 | 33.52326 | 173.1422 | 4.054355 | 0.008515601 | 0           | 2.187531663 |
|                      | Mtr.44416.1.S1_at   | 10.9402  | 13.38551 | 12.17507 | 33.58055 | 23.78544 | 31.61381 | 12.16693 | 1.222679 | 29.65993 | 5.181628 | 0.00470852  | 1.4693E-135 | 2.437750709 |
| IMGA Medtr3g104780.1 | Mtr.44462.1.S1_at   | 26.1268  | 22.69494 | 17.30601 | 77.58166 | 39.14787 | 48.56364 | 22.04258 | 4.446435 | 55.09772 | 20.03272 | 0.049307885 | 6.12961E-38 | 2.499603941 |
| IMGA AC233572_25.1   | Mtr.44504.1.S1_at   | 11.48102 | 13.05673 | 17.53303 | 53.64684 | 88.50648 | 69.86498 | 14.02359 | 3.139716 | 70.67277 | 17.44385 | 0.0052044   | 2.1708E-214 | 5.039562714 |
|                      | Mtr.44516.1.S1_at   | 116.6709 | 183.9894 | 208.4954 | 654.977  | 412.0316 | 553.0219 | 169.7185 | 47.54656 | 540.0102 | 121.9942 | 0.008053017 | 1.81111E-41 | 3.181798442 |
| IMGA Medtr3g080860.1 | Mtr.44658.1.S1_at   | 17.74844 | 11.79972 | 16.72876 | 26.21774 | 180.2595 | 38.23118 | 15.42564 | 3.181261 | 81.56947 | 85.67887 | 0.252427118 | 5.3967E-284 | 5.287914058 |
| IMGA Medtr5g023260.1 | Mtr.44713.1.S1_at   | 20.18425 | 23.27258 | 27.3806  | 56.69831 | 48.87836 | 47.19832 | 23.61248 | 13.00199 | 50.925   | 5.069911 | 0.001607682 | 0           | 2.156698707 |
| IMGA Medtr7g070050.1 | Mtr.45080.1.S1_at   | 239.043  | 225.1983 | 209.8468 | 666.7109 | 549.6315 | 600.2652 | 224.696  | 14.60455 | 605.5359 | 58.71739 | 0.000401947 | 0           | 2.694911223 |
|                      | Mtr.45103.1.S1_at   | 6.122785 | 4.748973 | 5.899594 | 13.70045 | 18.97218 | 20.26995 | 5.590451 | 0.737236 | 17.64753 | 3.479313 | 0.004201745 | 1.7005E-176 | 3.15672678  |
|                      | Mtr.45188.1.S1_at   | 8.281545 | 9.151173 | 7.251129 | 30.37514 | 19.51404 | 16.33336 | 8.227949 | 0.951155 | 22.07418 | 7.362651 | 0.031961696 | 2.8816E-140 | 2.682829058 |
| IMGA Medtr3g111120.1 | Mtr.45211.1.S1_at   | 25.17006 | 28.21925 | 23.58859 | 61.86498 | 46.16744 | 92.03941 | 25.6593  | 2.353776 | 66.69061 | 23.31361 | 0.038668757 | 2.9136E-200 | 2.59908163  |
|                      | Mtr.4531.1.S1_s_at  | 3.940089 | 4.83746  | 4.274285 | 4.916738 | 32.85405 | 4.961991 | 4.350611 | 0.453528 | 14.24426 | 16.11656 | 0.347757588 | 0           | 3.274081941 |
| IMGA Medtr7g084750.1 | Mtr.45463.1.S1_at   | 11.63247 | 16.88078 | 25.00606 | 34.70526 | 37.88945 | 57.08492 | 17.83977 | 6.738173 | 43.22655 | 12.10684 | 0.033743722 | 6.76941E-11 | 2.423043987 |
|                      | Mtr.4561.1.S1_at    | 7.613411 | 6.664411 | 5.325321 | 16.2428  | 13.17115 | 21.39878 | 6.534381 | 1.149574 | 16.93758 | 4.157584 | 0.013949409 | 2.2777E-55  | 2.592070567 |
| IMGA Medtr5g030030.1 | Mtr.45653.1.S1_at   | 36.80043 | 47.77051 | 44.56378 | 146.7017 | 91.46376 | 244.365  | 43.0449  | 5.64056  | 160.8435 | 77.42537 | 0.058292499 | 1.6503E-286 | 3.736644181 |
| IMGA Medtr7g016820.1 | Mtr.45667.1.S1_x_at | 38.09975 | 24.98497 | 24.0582  | 196.5707 | 205.5316 | 182.6983 | 29.04764 | 7.853038 | 194.9336 | 11.50437 | 3.26282E-05 | 0           | 6.710822561 |
| IMGA Medtr4g100590.2 | Mtr.45897.1.S1_at   | 27.80086 | 29.67756 | 29.54418 | 87.19343 | 79.59264 | 70.25424 | 29.00753 | 1.047134 | 79.01344 | 8.484438 | 0.000534262 | 0           | 2.723893612 |
| IMGA Medtr1g031640.1 | Mtr.45999.1.S1_at   | 51.65097 | 105.4338 | 37.14628 | 134.78   | 139.2417 | 191.4162 | 64.74367 | 35.97721 | 155.1459 | 31.49009 | 0.03064632  | 6.61294E-07 | 2.396310429 |
| IMGA Medtr1g015780.1 | Mtr.46412.1.S1_at   | 9.35304  | 19.79126 | 20.16232 | 77.36498 | 60.07204 | 146.9722 | 16.43554 | 6.136431 | 94.80308 | 45.99974 | 0.043032288 | 2.0397E-108 | 5.768175124 |
| IMGA Medtr8g087410.1 | Mtr.46485.1.S1_at   | 11.31471 | 15.4453  | 15.40186 | 29.80803 | 25.96088 | 37.48863 | 14.05395 | 2.372357 | 31.08584 | 5.869146 | 0.00958948  | 1.69032E-35 | 2.211893004 |
|                      | Mtr.4652.1.S1_at    | 169.5819 | 155.1949 | 148.7147 | 453.6983 | 408.741  | 518.1919 | 157.8305 | 10.68031 | 460.2104 | 55.01525 | 0.000729992 | 0           | 2.915852336 |
| IMGA Medtr4g013730.1 | Mtr.4663.1.S1_at    | 8.095598 | 5.622203 | 10.39645 | 20.11067 | 14.39201 | 24.51298 | 8.038083 | 2.387643 | 19.67188 | 5.074729 | 0.022902334 | 3.19029E-17 | 2.447335206 |
| IMGA Medtr3g072170.1 | Mtr.46631.1.S1_at   | 7.484424 | 7.254832 | 8.84076  | 8.773184 | 158.277  | 10.24922 | 7.860005 | 0.857081 | 59.09979 | 85.89312 | 0.359879461 | 0           | 7.519051726 |
| IMGA Medtr1g084010.1 | Mtr.46919.1.S1_at   | 11.6676  | 10.24068 | 10.16686 | 18.70559 | 21.29611 | 25.31616 | 10.69171 | 0.845951 | 21.77262 | 3.330942 | 0.005041986 | 6.0644E-114 | 2.036401589 |
| IMGA Medtr7g071970.1 | Mtr.47022.1.S1_s_at | 4077.795 | 2698.282 | 3534.468 | 8437.774 | 7408.05  | 9098.777 | 3436.848 | 694.9183 | 8314.867 | 852.0382 | 0.001542394 | 0           | 2.419329115 |
| IMGA Medtr3g009030.1 | Mtr.47087.1.S1_at   | 50.23961 | 52.0473  | 77.547   | 137.363  | 98.82146 | 125.4257 | 59.94464 | 15.27087 | 120.5367 | 19.73043 | 0.013625501 | 6.30996E-12 | 2.010801011 |
| IMGA Medtr7g088790.1 | Mtr.4716.1.S1_at    | 7.151972 | 8.606409 | 13.13902 | 16.70686 | 36.03097 | 28.79215 | 9.632467 | 3.122624 | 27.17666 | 9.762821 | 0.041364617 | 2.21644E-22 | 2.821360019 |
| IMGA Medtr7g023730.1 | Mtr.47292.1.S1_at   | 18.10219 | 20.47911 | 23.88528 | 38.00925 | 59.28692 | 55.31043 | 20.82219 | 2.906772 | 50.86887 | 11.31284 | 0.01119855  | 1.10205E-71 | 2.443012125 |
| IMGA Medtr7g023670.1 | Mtr.47295.1.S1_x_at | 90.20523 | 117.0947 | 175.2911 | 340.0764 | 678.5906 | 717.3542 | 127.5303 | 43.49225 | 578.6737 | 207.5384 | 0.021110092 | 3.56561E-72 | 4.537537889 |
| IMGA Medtr4g095450.2 | Mtr.47795.1.S1_at   | 1093.304 | 1256.593 | 2060.579 | 3564.121 | 3521.691 | 4255.05  | 1470.159 | 517.7959 | 3780.287 | 411.7038 | 0.003769437 | 0           | 2.571346597 |
| IMGA Medtr2g007960.1 | Mtr.47908.1.S1_at   | 66.01823 | 134.132  | 81.09146 | 189.1262 | 192.1004 | 258.404  | 93.74724 | 35.77708 | 213.2102 | 39.1672  | 0.017533211 | 7.31719E-09 | 2.274309299 |
| IMGA Medtr3g085640.1 | Mtr.4792.1.S1_at    | 66.67605 | 82.77017 | 75.09088 | 136.4342 | 145.2876 | 186.0343 | 74.8457  | 8.04986  | 155.9187 | 26.45386 | 0.007089181 | 3.81773E-68 | 2.083201649 |
| IMGA Medtr3g109430.1 | Mtr.47992.1.S1_at   | 10.52685 | 13.38957 | 19.90459 | 43.42733 | 39.11689 | 61.77214 | 14.607   | 4.805943 | 48.10545 | 12.03033 | 0.011000494 | 1.4714E-33  | 3.293314146 |
| IMGA Medtr3g106060.1 | Mtr.48109.1.S1_at   | 8.738744 | 10.31104 | 11.15243 | 68.88729 | 21.68102 | 17.641   | 10.0674  | 1.225147 | 36.06977 | 28.49251 | 0.18943242  | 8.0393E-296 | 3.582827567 |
| IMGA Medtr2g007560.1 | Mtr.48534.1.S1_at   | 39.98845 | 56.13098 | 69.69831 | 197.3423 | 134.0316 | 182.6983 | 55.27258 | 14.87352 | 171.3574 | 33.14397 | 0.005208613 | 1.21953E-41 | 3.100224952 |
| IMGA Medtr3g062600.1 | Mtr.48713.1.S1_at   | 91.64133 | 88.83108 | 127.1785 | 213.8037 | 469.3903 | 239.8195 | 102.5503 | 21.37487 | 307.6712 | 140.6557 | 0.066965732 | 4.88016E-62 | 3.000197893 |
| IMGA Medtr4g106860.1 | Mtr.48768.1.S1_at   | 2274.547 | 2657.285 | 2083.41  | 13433.23 | 12147.61 | 14895.29 | 2338.414 | 292.2196 | 13492.05 | 1374.779 | 0.000162326 | 0           | 5.769741636 |

|                      |                     |          |          |          |          |          |          |          |          |          |          |             |             |             |            |
|----------------------|---------------------|----------|----------|----------|----------|----------|----------|----------|----------|----------|----------|-------------|-------------|-------------|------------|
| IMGA Medtr1g072420.1 | Mtr.48829.1.S1_at   | 18.18719 | 23.94432 | 17.96344 | 38.40172 | 46.33669 | 54.53558 | 20.03165 | 3.390317 | 46.42467 | 8.067288 | 0.006409813 | 1.95156E-41 | 2.317565603 |            |
| IMGA Medtr1g014090.1 | Mtr.48925.1.S1_at   | 288.5238 | 283.9488 | 422.4604 | 834.7424 | 714.0648 | 774.7427 | 331.6443 | 78.68233 | 774.5167 | 60.33908 | 0.001503697 | 0           | 2.335383429 |            |
| IMGA Medtr5g006450.1 | Mtr.49090.1.S1_at   | 32.95877 | 42.922   | 102.6983 | 246.5021 | 179.3908 | 234.3999 | 59.52636 | 37.71843 | 220.0976 | 35.76867 | 0.005884394 | 7.54952E-15 | 3.697481081 |            |
| IMGA Medtr2g025120.1 | Mtr.49441.1.S1_at   | 902.7466 | 1225.78  | 1281.666 | 1946.892 | 2167.008 | 2767.032 | 1136.731 | 204.5537 | 2293.644 | 424.4817 | 0.013130392 | 1.16991E-22 | 2.017755063 |            |
| IMGA Medtr6g023340.1 | Mtr.49448.1.S1_at   | 407.6983 | 661.0738 | 561.365  | 1394.466 | 1347.992 | 2540.733 | 543.379  | 127.6417 | 1761.064 | 675.6131 | 0.037384681 | 2.48417E-61 | 3.24094886  |            |
| IMGA Medtr5g025150.1 | Mtr.49487.1.S1_at   | 298.0625 | 329.1328 | 383.1686 | 1404.698 | 1013.532 | 1406.198 | 336.788  | 43.06637 | 1274.809 | 226.2745 | 0.002130322 | 0           | 3.785199163 |            |
| IMGA Medtr4g086330.1 | Mtr.49557.1.S1_at   | 14.31372 | 16.26546 | 12.24727 | 50.77037 | 36.18836 | 65.78064 | 14.27548 | 2.009363 | 50.91312 | 14.79666 | 0.013161398 | 6.7285E-219 | 3.566472846 |            |
| IMGA Medtr6g082650.1 | Mtr.49702.1.S1_at   | 22.69327 | 27.06588 | 26.23778 | 64.79579 | 64.79579 | 51.30048 | 73.70714 | 25.33231 | 2.322675 | 63.26781 | 11.28121    | 0.004667632 | 4.739E-176  | 2.49751434 |
| IMGA Medtr8g013610.1 | Mtr.50504.1.S1_at   | 8.060394 | 10.06374 | 15.72871 | 22.51363 | 27.29971 | 25.23738 | 11.28428 | 3.97719  | 25.01691 | 2.400643 | 0.006885727 | 0           | 2.216969786 |            |
| IMGA Medtr5g014150.1 | Mtr.50780.1.S1_at   | 13.48292 | 13.42574 | 13.75675 | 37.77787 | 39.94243 | 57.53165 | 13.55514 | 0.176926 | 45.08398 | 10.83419 | 0.007283028 | 0           | 3.325970507 |            |
| IMGA Medtr5g017210.1 | Mtr.50930.1.S1_at   | 81.04246 | 50.87857 | 52.0542  | 278.3898 | 189.4677 | 207.298  | 61.32508 | 17.08587 | 225.0519 | 47.04448 | 0.004784937 | 7.26299E-62 | 3.669817692 |            |
| IMGA Medtr8g104490.2 | Mtr.51042.1.S1_at   | 39.86525 | 178.1148 | 126.9756 | 689.785  | 172.6829 | 230.4845 | 114.9852 | 69.90036 | 364.3175 | 283.3409 | 0.213027037 | 6.48495E-10 | 3.16838601  |            |
| IMGA Medtr4g108150.1 | Mtr.51082.1.S1_at   | 33.25015 | 19.80651 | 40.71691 | 116.5314 | 142.2137 | 165.3545 | 31.25786 | 10.59661 | 141.3666 | 24.42259 | 0.002010004 | 2.03374E-72 | 4.522592774 |            |
| IMGA Medtr7g086320.1 | Mtr.51154.1.S1_at   | 7.316809 | 8.214612 | 5.979902 | 6.769119 | 113.2136 | 11.30335 | 7.170441 | 1.124522 | 43.76203 | 60.18955 | 0.351827473 | 0           | 6.103115229 |            |
| IMGA Medtr5g030920.1 | Mtr.51192.1.S1_at   | 21.20955 | 16.94887 | 16.67692 | 56.1498  | 43.36505 | 61.73137 | 18.27844 | 2.54205  | 53.74874 | 9.415641 | 0.003245677 | 4.84E-129   | 2.940553291 |            |
| IMGA Medtr3g019080.1 | Mtr.51222.1.S1_at   | 7.403398 | 14.99804 | 8.414724 | 44.95856 | 20.28378 | 31.3841  | 10.27205 | 4.123941 | 32.20881 | 12.35805 | 0.043396755 | 3.15958E-20 | 3.13557715  |            |
| IMGA Medtr2g062600.1 | Mtr.51360.1.S1_at   | 52.35269 | 54.85605 | 64.09466 | 78.29673 | 245.4568 | 299.3224 | 57.10113 | 6.184559 | 207.692  | 115.2507 | 0.086689039 | 0           | 3.637265268 |            |
|                      | Mtr.51374.1.S1_at   | 31.81327 | 28.09249 | 38.03986 | 43.52045 | 218.8634 | 53.44563 | 32.64854 | 5.026013 | 105.2765 | 98.49423 | 0.271164689 | 2.9703E-138 | 3.224538681 |            |
| IMGA Medtr3g096910.1 | Mtr.51564.1.S1_at   | 129.6921 | 109.7717 | 66.35806 | 252.591  | 195.9044 | 269.1279 | 101.9406 | 3.23851  | 239.2078 | 38.40248 | 0.009085047 | 2.11292E-13 | 2.346539847 |            |
| IMGA Medtr2g099630.1 | Mtr.51785.1.S1_at   | 19.45948 | 22.80882 | 15.1517  | 32.32797 | 38.56075 | 49.27236 | 19.14    | 3.838543 | 40.05369 | 8.570285 | 0.018187311 | 3.84395E-21 | 2.092696961 |            |
| IMGA Medtr4g106590.1 | Mtr.51829.1.S1_at   | 29.55289 | 27.98585 | 40.63237 | 154.5718 | 153.865  | 118.1566 | 32.72371 | 6.893776 | 142.1978 | 20.82327 | 0.000984936 | 0           | 4.345406905 |            |
| IMGA Medtr4g106590.1 | Mtr.51829.1.S1_s_at | 264.7506 | 281.0316 | 379.5316 | 1528.698 | 1138.365 | 1092.088 | 308.438  | 62.10475 | 1253.05  | 239.8369 | 0.002724562 | 5.9388E-153 | 4.062568338 |            |
| IMGA Medtr7g081500.1 | Mtr.51889.1.S1_s_at | 451.3138 | 574.1983 | 409.6222 | 987.1799 | 1065.46  | 1228.559 | 478.3781 | 85.56097 | 1093.733 | 123.1481 | 0.002070112 | 0           | 2.286335361 |            |
| IMGA Medtr5g037700.1 | Mtr.51997.1.S1_at   | 5.728851 | 9.140906 | 7.766433 | 16.3352  | 24.4608  | 20.51845 | 7.545397 | 1.716733 | 20.43815 | 4.063395 | 0.007168662 | 1.10704E-38 | 2.708690729 |            |
| IMGA Medtr4g094240.1 | Mtr.52124.1.S1_s_at | 4322.687 | 3914.796 | 4267.3   | 8699.811 | 7855.746 | 9799.498 | 4168.261 | 221.247  | 8785.018 | 974.6734 | 0.001323453 | 4.8511E-286 | 2.107597785 |            |
| IMGA Medtr3g087330.1 | Mtr.52244.1.S1_at   | 7.760182 | 10.23911 | 7.482159 | 15.88736 | 20.30787 | 21.28441 | 8.493816 | 1.517845 | 19.15988 | 2.875839 | 0.004738296 | 4.42835E-34 | 2.255744817 |            |
| IMGA Medtr1g098550.1 | Mtr.52248.1.S1_at   | 123.0766 | 117.3168 | 134.0882 | 275.1646 | 294.2232 | 277.9831 | 124.8272 | 8.521636 | 282.457  | 10.28683 | 3.38397E-05 | 0           | 2.262783599 |            |
|                      | Mtr.5260.1.S1_at    | 23.6076  | 20.92261 | 41.12926 | 296.4368 | 108.6449 | 220.2508 | 28.55316 | 10.97365 | 208.4441 | 94.45103 | 0.030592295 | 2.433E-177  | 7.300213362 |            |
|                      | Mtr.5335.1.S1_at    | 55.601   | 61.06067 | 63.81135 | 151.8108 | 122.2132 | 108.0856 | 60.15767 | 4.178995 | 127.3699 | 22.31403 | 0.006848175 | 8.8331E-171 | 2.11726729  |            |
| IMGA Medtr4g106590.1 | Mtr.5343.1.S1_s_at  | 78.67955 | 73.70312 | 99.36498 | 443.5914 | 337.3596 | 304.7114 | 83.91588 | 13.60872 | 361.8874 | 72.61631 | 0.002862529 | 3.6111E-274 | 4.312502292 |            |
| IMGA Medtr5g055680.1 | Mtr.5486.1.S1_s_at  | 7.942212 | 5.403197 | 8.479815 | 16.21295 | 31.37208 | 30.84845 | 7.275075 | 1.643228 | 26.14449 | 8.604952 | 0.02028411  | 5.05302E-88 | 3.59370795  |            |
| IMGA Medtr4g101280.1 | Mtr.5687.1.S1_s_at  | 10.43629 | 10.49112 | 10.95158 | 25.80796 | 48.12715 | 103.3614 | 10.62633 | 0.283009 | 59.09882 | 39.92387 | 0.103318064 | 0           | 5.561546545 |            |
| IMGA Medtr2g010470.1 | Mtr.5765.1.S1_at    | 11.91915 | 11.35792 | 19.10784 | 45.365   | 45.29395 | 37.27836 | 14.1283  | 4.321528 | 42.64577 | 4.648449 | 0.001470172 | 0           | 3.018463456 |            |
| IMGA Medtr3g108240.3 | Mtr.5950.1.S1_s_at  | 343.8815 | 338.1499 | 388.3276 | 897.0316 | 712.2273 | 1023.346 | 356.7863 | 27.46544 | 877.5349 | 156.4729 | 0.004749348 | 1.5865E-236 | 2.459553035 |            |
| IMGA Medtr4g027240.1 | Mtr.6484.1.S1_at    | 61.19831 | 62.00213 | 92.35073 | 354.6676 | 202.8288 | 275.0853 | 71.85039 | 17.75836 | 277.5272 | 75.94886 | 0.010281253 | 1.63229E-89 | 3.862571143 |            |
| IMGA Medtr1g090150.1 | Mtr.6489.1.S1_at    | 10.29517 | 14.34987 | 11.32936 | 58.23934 | 35.00388 | 25.14434 | 11.99146 | 2.106878 | 39.46252 | 16.99204 | 0.049873094 | 6.2795E-113 | 3.290884293 |            |
|                      | Mtr.6543.1.S1_at    | 10.42107 | 13.76917 | 15.67601 | 74.12879 | 39.83612 | 51.51326 | 13.28875 | 2.660207 | 55.15939 | 17.43466 | 0.014707423 | 1.2079E-163 | 4.150833833 |            |
|                      | Mtr.6645.1.S1_at    | 9.722878 | 13.4401  | 12.70764 | 277.5291 | 29.09417 | 58.29553 | 11.95687 | 1.969053 | 121.6396 | 135.7915 | 0.234410661 | 0           | 10.17319672 |            |
| IMGA Medtr8g046210.1 | Mtr.6667.1.S1_at    | 19.58937 | 16.53867 | 43.99647 | 97.71165 | 75.03165 | 82.09714 | 26.70817 | 15.0496  | 84.94681 | 11.60543 | 0.00605531  | 0           | 3.180555301 |            |
| IMGA Medtr3g102020.1 | Mtr.7249.1.S1_at    | 24.28662 | 24.03334 | 31.2437  | 51.85043 | 71.69831 | 52.40057 | 26.52122 | 4.09175  | 58.64977 | 11.30372 | 0.009814101 | 3.99933E-42 | 2.211427993 |            |
|                      | Mtr.7260.1.S1_at    | 67.77453 | 92.26848 | 125.2592 | 340.4898 | 416.021  | 393.3432 | 95.10075 | 28.84683 | 383.2847 | 38.75722 | 0.000495312 | 0           | 4.030301061 |            |
| IMGA Medtr4g027040.1 | Mtr.7267.1.S1_at    | 9.430828 | 6.440316 | 11.71853 | 17.91327 | 21.16725 | 17.64537 | 9.196557 | 2.646892 | 18.90863 | 1.960604 | 0.006949126 | 0           | 2.056055219 |            |
|                      | Mtr.7268.1.S1_at    | 6.400543 | 7.572959 | 8.129459 | 15.70202 | 107.0723 | 26.02194 | 7.367654 | 0.882553 | 49.59874 | 50.04028 | 0.21767723  | 0           | 6.731959125 |            |
| IMGA Medtr7g085810.1 | Mtr.7556.1.S1_at    | 8.170352 | 6.542034 | 21.6205  | 30.02345 | 31.5099  | 94.65201 | 12.11096 | 8.275645 | 52.06179 | 36.89171 | 0.141196051 | 6.19244E-17 | 4.298733087 |            |
|                      | Mtr.7658.1.S1_at    | 285.5908 | 255.4359 | 293.9925 | 729.5802 | 600.8478 | 690.3977 | 278.3397 | 20.27523 | 673.6085 | 65.98798 | 0.000580332 | 0           | 2.420094895 |            |
|                      | Mtr.7741.1.S1_at    | 24.07138 | 37.4252  | 30.20885 | 124.6231 | 100.48   | 330.5904 | 30.56848 | 6.684168 | 185.2312 | 126.4622 | 0.101875837 | 0           | 6.05954779  |            |
|                      | Mtr.7854.1.S1_at    | 277.2884 | 238.994  | 394.4019 | 693.3639 | 625.3889 | 780.3285 | 303.5614 | 80.96673 | 699.6938 | 77.66353 | 0.003619961 | 0           | 2.304949481 |            |
| IMGA Medtr1g025340.1 | Mtr.7906.1.S1_at    | 44.81952 | 42.35919 | 61.25663 | 289.865  | 109.0093 | 187.3034 | 49.47845 | 10.27412 | 195.3926 | 90.69878 | 0.050394141 | 1.3026E-133 | 3.949044042 |            |
| IMGA Medtr5g018750.1 | Mtr.81.1.S1_at      | 116.8554 | 108.809  | 85.04682 | 259.5914 | 305.6341 | 352.6763 | 103.5704 | 16.53868 | 95.9673  | 46.54337 | 0.002081642 | 1.0293E-99  | 2.954196405 |            |
| IMGA Medtr1g022970.1 | Mtr.8179.1.S1_at    | 7.933874 | 13.23795 | 7.274796 | 26.65117 | 33.53496 | 27.42184 | 9.482207 | 3.269221 | 29.20266 | 3.771619 | 0.002385959 | 0           | 3.079732176 |            |

|                      |                    |          |          |          |          |          |          |          |          |          |          |             |             |             |
|----------------------|--------------------|----------|----------|----------|----------|----------|----------|----------|----------|----------|----------|-------------|-------------|-------------|
| IMGA Medtr5g018770.1 | Mtr.82.1.S1_at     | 327.022  | 365.8288 | 379.578  | 818.4424 | 906.1531 | 810.3203 | 357.4763 | 27.25538 | 844.9719 | 53.13984 | 0.000145282 | 0           | 2.363714664 |
| IMGA Medtr5g017850.1 | Mtr.8319.1.S1_at   | 14.81921 | 28.5613  | 12.68629 | 90.46798 | 104.9754 | 125.9594 | 18.68893 | 8.615981 | 107.1343 | 17.84392 | 0.001507465 | 0           | 5.732497328 |
|                      | Mtr.8398.1.S1_at   | 13.66656 | 12.81257 | 10.26609 | 79.7244  | 25.08959 | 22.5871  | 12.24841 | 1.76904  | 42.46703 | 32.29008 | 0.180863851 | 2.2308E-192 | 3.467146805 |
|                      | Mtr.8442.1.S1_at   | 265.081  | 327.5878 | 253.4036 | 684.5738 | 641.4209 | 610.1234 | 282.0242 | 39.8889  | 645.3727 | 37.38218 | 0.000325087 | 0           | 2.288359787 |
| IMGA Medtr1g072610.3 | Mtr.8458.1.S1_at   | 8.84559  | 9.577211 | 8.040924 | 15.12919 | 22.03211 | 20.73177 | 8.821242 | 0.768433 | 19.29769 | 3.668107 | 0.008389179 | 2.857E-123  | 2.187638475 |
|                      | Mtr.8460.1.S1_s_at | 10.44179 | 8.263957 | 8.220572 | 26.31267 | 23.61648 | 38.08934 | 8.97544  | 1.270082 | 29.3395  | 7.696566 | 0.010645174 | 9.8415E-170 | 3.268864675 |
|                      | Mtr.8498.1.S1_at   | 356.8033 | 192.8762 | 298.5866 | 2610.886 | 2769.421 | 4515.293 | 282.7554 | 83.10233 | 3298.533 | 1056.722 | 0.007884769 | 0           | 11.6656792  |
|                      | Mtr.8498.1.S1_s_at | 145.8853 | 84.20551 | 120.9474 | 1006.466 | 900.0581 | 2277.881 | 117.0127 | 31.02756 | 1394.802 | 766.6176 | 0.044805373 | 0           | 11.92008527 |
|                      | Mtr.8507.1.S1_at   | 91.69622 | 56.77539 | 59.1071  | 1558.017 | 697.149  | 755.4364 | 69.1929  | 19.52329 | 1003.534 | 481.0801 | 0.028273933 | 0           | 14.5034278  |
| IMGA Medtr7g050980.1 | Mtr.8508.1.S1_at   | 51.5324  | 75.72769 | 71.18557 | 274.0627 | 260.5934 | 394.3222 | 66.14855 | 12.86008 | 309.6595 | 73.62876 | 0.004855828 | 6.4793E-236 | 4.681273623 |
| IMGA Medtr7g093530.1 | Mtr.8522.1.S1_at   | 16.93881 | 37.54964 | 18.92185 | 91.07547 | 46.8515  | 134.0137 | 24.4701  | 11.37053 | 90.6469  | 43.58269 | 0.063655836 | 6.73262E-24 | 3.704394063 |
| IMGA Medtr1g115820.1 | Mtr.8531.1.S1_at   | 880.1216 | 823.599  | 1207.354 | 2332.17  | 1889.84  | 1908.598 | 970.3581 | 207.1808 | 2043.536 | 250.1404 | 0.004613932 | 2.91525E-19 | 2.105960957 |
| IMGA Medtr1g090060.1 | Mtr.8546.1.S1_at   | 254.6983 | 311.2594 | 271.7594 | 1712.942 | 3137.41  | 1768.97  | 279.239  | 29.01287 | 2206.441 | 806.7301 | 0.014434695 | 0           | 7.901619963 |
| IMGA Medtr3g082100.1 | Mtr.8548.1.S1_at   | 1064.453 | 1508.546 | 1632.274 | 3507.561 | 5419.888 | 3975.195 | 1401.757 | 298.5936 | 4300.882 | 996.8965 | 0.008490453 | 1.83392E-63 | 3.068206613 |
| IMGA Medtr5g094210.1 | Mtr.8557.1.S1_s_at | 317.155  | 401.2225 | 235.8167 | 942.7868 | 1059.663 | 691.9573 | 318.0647 | 82.70664 | 898.1358 | 187.8755 | 0.008075952 | 5.8853E-34  | 2.823751801 |
|                      | Mtr.8558.1.S1_at   | 6.938022 | 9.940736 | 7.267377 | 19.15503 | 35.87714 | 46.87129 | 8.048712 | 1.646796 | 33.96782 | 13.95643 | 0.033073622 | 1.2436E-163 | 4.220280099 |
|                      | Mtr.8559.1.S1_at   | 336.5237 | 469.865  | 318.7373 | 760.7342 | 996.0316 | 824.0256 | 375.042  | 82.59927 | 860.2638 | 121.7626 | 0.004646253 | 2.56998E-24 | 2.293779975 |
| IMGA AC235753_8.1    | Mtr.8574.1.S1_at   | 119.688  | 195.4856 | 197.4478 | 614.6219 | 1297.145 | 684.9766 | 170.8738 | 44.33905 | 865.5811 | 375.397  | 0.033432894 | 3.5186E-162 | 5.065615557 |
|                      | Mtr.8601.1.S1_at   | 29.76819 | 50.34174 | 44.22215 | 208.6983 | 165.5316 | 230.8148 | 41.44403 | 10.56438 | 201.6816 | 33.20239 | 0.001345814 | 0           | 4.866360824 |
| IMGA Medtr7g011990.1 | Mtr.8606.1.S1_at   | 10.28534 | 11.87128 | 9.796098 | 15.30841 | 43.90131 | 40.9261  | 10.65091 | 1.064818 | 33.37861 | 15.7198  | 0.066890906 | 2.6243E-288 | 3.13387484  |
| IMGA Medtr8g005420.1 | Mtr.8617.1.S1_at   | 351.1317 | 506.5787 | 454.396  | 1641.311 | 890.3905 | 1601.134 | 437.3688 | 79.10993 | 1377.612 | 422.4242 | 0.019279386 | 3.67164E-94 | 3.149772241 |
| IMGA Medtr8g037800.1 | Mtr.8630.1.S1_at   | 13.12561 | 45.36235 | 11.13705 | 166.8278 | 140.1983 | 292.5316 | 23.20834 | 19.21169 | 199.8526 | 81.35931 | 0.021582011 | 4.21247E-57 | 8.611242283 |
|                      | Mtr.8652.1.S1_at   | 79.86498 | 61.40565 | 121.0031 | 352.0316 | 358.6893 | 343.0356 | 87.42458 | 30.50942 | 351.2522 | 7.855895 | 0.000131367 | 0           | 4.01773697  |
|                      | Mtr.8654.1.S1_at   | 37.80458 | 29.32334 | 60.4905  | 100.7778 | 205.2669 | 210.0887 | 42.53947 | 16.11404 | 172.0445 | 61.76584 | 0.024583146 | 4.78203E-44 | 4.044348663 |
| IMGA Medtr4g093580.2 | Mtr.8656.1.S1_s_at | 100.1786 | 129.4251 | 188.0355 | 493.4244 | 231.2118 | 369.183  | 329.2131 | 44.73879 | 364.6064 | 131.1662 | 0.047975736 | 2.63732E-18 | 2.619053046 |
| IMGA AC235753_1.1    | Mtr.8672.1.S1_at   | 137.7904 | 125.0266 | 117.3723 | 927.2705 | 612.7029 | 1008.408 | 126.7298 | 10.31508 | 849.4603 | 209.0129 | 0.00392587  | 0           | 6.702926235 |
|                      | Mtr.8779.1.S1_at   | 7.820858 | 8.973592 | 8.365531 | 93.45643 | 132.5257 | 165.0351 | 8.38666  | 0.576657 | 130.3391 | 35.83938 | 0.004146897 | 0           | 15.54123519 |
|                      | Mtr.8789.1.S1_s_at | 245.5675 | 256.9889 | 285.5986 | 483.2173 | 623.865  | 778.1796 | 262.7183 | 20.62142 | 628.4206 | 147.5339 | 0.013136913 | 3.4427E-207 | 2.391993847 |
| IMGA Medtr1g023260.2 | Mtr.8813.1.S1_at   | 268.8431 | 233.8722 | 301.9419 | 632.4879 | 555.8213 | 651.2386 | 268.2191 | 34.03913 | 613.1826 | 50.55329 | 0.00060678  | 0           | 2.286125842 |
|                      | Mtr.8827.1.S1_at   | 9.149926 | 6.147004 | 6.950499 | 16.58721 | 20.04867 | 21.02146 | 7.41581  | 1.554597 | 19.21911 | 2.330617 | 0.001874864 | 0           | 2.591640274 |
|                      | Mtr.8884.1.S1_at   | 23.29658 | 20.55645 | 17.95419 | 33.37287 | 48.96505 | 44.13684 | 20.6024  | 2.671488 | 12.5825  | 7.982176 | 0.011372837 | 2.19655E-44 | 2.046278239 |
| IMGA Medtr6g008500.1 | Mtr.8948.1.S1_at   | 247.5158 | 249.7591 | 642.7574 | 796.125  | 693.741  | 957.8748 | 380.0108 | 227.548  | 815.9136 | 133.1741 | 0.045761844 | 1.4337E-08  | 2.147080335 |
|                      | Mtr.8987.1.S1_at   | 5.737196 | 6.681267 | 6.681267 | 17.79767 | 22.6444  | 31.55119 | 6.366577 | 0.54506  | 23.99776 | 6.975924 | 0.012021206 | 0           | 3.769334174 |
| IMGA Medtr8g107620.1 | Mtr.8993.1.S1_at   | 3256.752 | 3194.163 | 2033.365 | 6264.734 | 5641.038 | 6668.36  | 2828.093 | 688.9661 | 6191.378 | 517.5746 | 0.002497325 | 0           | 2.189240819 |
|                      | Mtr.9079.1.S1_at   | 43.9991  | 70.81627 | 57.89977 | 133.0553 | 93.00046 | 183.9882 | 57.57171 | 13.41159 | 136.6813 | 45.60212 | 0.044893581 | 1.66977E-24 | 2.37410533  |
| IMGA Medtr5g020020.2 | Mtr.9112.1.S1_at   | 129.365  | 121.9365 | 107.1353 | 725.9426 | 627.0339 | 636.6251 | 119.4789 | 11.31676 | 663.2005 | 54.54746 | 7.17861E-05 | 0           | 5.550774112 |
| IMGA Medtr3g087270.1 | Mtr.9232.1.S1_at   | 23.76237 | 45.80821 | 16.47421 | 103.3045 | 231.6983 | 230.6774 | 28.6816  | 15.27318 | 188.5601 | 73.83527 | 0.021339919 | 1.81519E-73 | 6.57425358  |
| IMGA Medtr5g098720.1 | Mtr.9254.1.S1_at   | 34.70051 | 50.47077 | 47.96248 | 516.9861 | 185.4617 | 232.7667 | 44.37792 | 8.474201 | 311.7382 | 179.3167 | 0.061353372 | 0           | 7.024623816 |
| IMGA Medtr3g031140.1 | Mtr.9319.1.S1_at   | 87.36498 | 91.77647 | 96.53165 | 481.3862 | 449.6989 | 350.0266 | 91.89103 | 4.584407 | 427.0372 | 68.54921 | 0.001074862 | 0           | 4.647213318 |
|                      | Mtr.9372.1.S1_at   | 7.943718 | 6.356757 | 17.24871 | 84.51795 | 39.34215 | 49.69355 | 10.51639 | 5.884099 | 57.85122 | 23.66693 | 0.028256901 | 3.96307E-44 | 5.501051089 |
|                      | Mtr.9382.1.S1_at   | 87.87424 | 75.63939 | 65.27512 | 154.8679 | 134.3525 | 185.8372 | 76.26292 | 11.31246 | 158.3525 | 25.91867 | 0.007345227 | 3.13676E-36 | 2.076402701 |
| IMGA Medtr1g086790.1 | Mtr.9388.1.S1_at   | 138.543  | 134.9816 | 122.1029 | 349.7862 | 262.6812 | 371.6244 | 131.8758 | 8.648889 | 328.0306 | 57.63794 | 0.004314683 | 0           | 2.487420128 |
|                      | Mtr.9496.1.S1_at   | 75.21352 | 66.55395 | 81.46458 | 143.993  | 226.0147 | 179.0157 | 74.41068 | 7.487664 | 183.0078 | 41.15634 | 0.010851902 | 2.9525E-139 | 2.459429078 |
| IMGA Medtr2g030530.1 | Mtr.9568.1.S1_at   | 42.70817 | 41.03182 | 33.87968 | 266.5542 | 57.03165 | 94.68098 | 39.20655 | 4.688737 | 139.4223 | 111.6972 | 0.195463581 | 5.3995E-300 | 3.556096142 |
|                      | Mtr.9637.1.S1_at   | 6.858476 | 6.073749 | 6.509731 | 45.16678 | 14.04084 | 13.34335 | 6.480652 | 0.393171 | 24.18365 | 18.17526 | 0.16694728  | 0           | 3.731669797 |
| IMGA Medtr5g073210.1 | Mtr.9645.1.S1_at   | 17.80764 | 29.42128 | 19.81601 | 34.9405  | 50.96937 | 54.23935 | 22.34831 | 6.207137 | 46.71641 | 10.32846 | 0.02483764  | 1.04828E-11 | 2.090377664 |
| IMGA Medtr5g036480.1 | Mtr.9656.1.S1_at   | 20.5763  | 32.3699  | 36.88235 | 56.65317 | 77.5286  | 89.14693 | 29.94285 | 8.419605 | 74.4429  | 16.46518 | 0.014055476 | 5.46673E-20 | 2.486166429 |
|                      | Mtr.9658.1.S1_at   | 184.9018 | 230.6183 | 372.2137 | 697.5797 | 688.5955 | 724.7051 | 262.5779 | 97.66014 | 703.6268 | 18.79899 | 0.001544859 | 0           | 2.679687577 |
|                      | Mtr.9830.1.S1_at   | 253.7018 | 233.6748 | 266.9418 | 708.865  | 777.0013 | 666.3234 | 251.4395 | 16.74846 | 717.3965 | 55.82998 | 0.000157721 | 0           | 2.853158238 |
|                      | Mtr.9846.1.S1_at   | 48.54425 | 49.25989 | 61.80792 | 104.9671 | 79.56096 | 143.0468 | 53.20402 | 7.459785 | 109.1916 | 31.95306 | 0.041744847 | 1.23187E-38 | 2.052318665 |

|                      |                     |          |          |          |          |          |          |          |          |          |          |             |             |             |
|----------------------|---------------------|----------|----------|----------|----------|----------|----------|----------|----------|----------|----------|-------------|-------------|-------------|
|                      | Mtr.9931.1.S1_at    | 105.5367 | 135.6464 | 77.92743 | 205.9023 | 250.0177 | 361.4238 | 106.3702 | 28.8685  | 272.4479 | 80.15031 | 0.027872935 | 2.18355E-23 | 2.561318903 |
|                      | Msa.1096.1.S1_at    | 253.6983 | 296.1983 | 253.7851 | 150.2869 | 72.8758  | 168.1906 | 267.8939 | 24.51236 | 130.4511 | 50.65887 | 0.013369416 | 0           | 0.486950575 |
|                      | Msa.1101.1.S1_at    | 102.4417 | 133.0316 | 201.6983 | 56.05729 | 44.36502 | 27.10201 | 145.7239 | 50.83097 | 42.50811 | 14.56668 | 0.027760813 | 1.26684E-34 | 0.291703075 |
|                      | Msa.1286.1.S1_at    | 1186.83  | 1265.246 | 1590.1   | 653.8423 | 550.494  | 541.8802 | 1347.392 | 213.8168 | 582.0722 | 62.30381 | 0.003998371 | 1.896E-100  | 0.43199905  |
| IMGA Medtr7g011060.2 | Msa.1315.1.S1_at    | 622.3058 | 686.4042 | 631.7749 | 196.0894 | 234.5847 | 158.1154 | 646.8283 | 34.59919 | 196.2632 | 38.23492 | 0.000111118 | 0           | 0.303423928 |
| IMGA Medtr6g012500.1 | Msa.1357.1.S1_at    | 585.8006 | 605.1881 | 812.4461 | 148.4067 | 190.3368 | 93.4012  | 667.8116 | 125.6317 | 144.0483 | 48.61457 | 0.002533231 | 1.03261E-77 | 0.215701943 |
|                      | Msa.1378.1.S1_at    | 215.0998 | 149.9851 | 170.5587 | 81.03173 | 57.7611  | 95.45392 | 178.5479 | 33.28441 | 78.08225 | 19.01872 | 0.010503122 | 5.72046E-20 | 0.437318295 |
| IMGA Medtr5g010150.1 | Msa.1445.1.S1_at    | 194.3631 | 206.865  | 226.1301 | 68.09966 | 112.3724 | 93.91798 | 209.1194 | 16.00304 | 91.46336 | 22.23823 | 0.001744655 | 0           | 0.437373846 |
| IMGA Medtr4g097700.1 | Msa.1752.1.S1_s_at  | 413.127  | 363.7359 | 404.9931 | 212.2676 | 240.4812 | 103.8884 | 393.952  | 26.48204 | 185.5457 | 72.11065 | 0.009315748 | 0           | 0.470985628 |
|                      | Msa.1860.1.S1_at    | 120.4524 | 126.865  | 208.3629 | 64.36498 | 52.45848 | 48.27993 | 151.8934 | 49.009   | 55.03446 | 8.346194 | 0.027925711 | 7.27165E-90 | 0.362322849 |
|                      | Msa.1890.1.S1_at    | 112.1983 | 129.365  | 323.0316 | 12.59936 | 11.45783 | 10.60037 | 188.1983 | 117.0841 | 11.55252 | 1.002854 | 0.059229075 | 0           | 0.061384838 |
|                      | Msa.1897.1.S1_at    | 30.29674 | 26.2383  | 58.36498 | 11.88868 | 8.526581 | 6.981003 | 38.30001 | 17.49486 | 9.132088 | 2.509243 | 0.046000404 | 3.74894E-90 | 0.238435681 |
| IMGA Medtr3g031650.1 | Msa.2715.1.S1_at    | 3856.662 | 4029.975 | 4415.045 | 1472.022 | 1376.567 | 1922.031 | 4100.561 | 285.8055 | 1590.207 | 291.3048 | 0.00043948  | 0           | 0.387802354 |
|                      | Msa.2788.1.S1_at    | 40.65151 | 43.20778 | 51.69831 | 15.47548 | 17.8226  | 14.71924 | 45.18587 | 5.782957 | 16.00577 | 1.618213 | 0.001091028 | 0           | 0.354220774 |
|                      | Msa.2799.1.S1_at    | 654.9483 | 532.5316 | 586.2103 | 146.1983 | 120.9625 | 120.0316 | 591.2301 | 61.36252 | 129.0641 | 14.84593 | 0.000222814 | 0           | 0.218297649 |
| IMGA Medtr4g097700.1 | Msa.3055.1.S1_at    | 2577.995 | 2377.72  | 2397.172 | 1266.707 | 1403.219 | 599.7578 | 2450.962 | 110.4428 | 1089.894 | 429.9237 | 0.006042334 | 0           | 0.444680215 |
|                      | Msa.3080.1.S1_at    | 146.9959 | 132.3213 | 100.4696 | 71.75893 | 43.66689 | 47.19832 | 126.5956 | 23.78579 | 54.20805 | 15.30173 | 0.011394869 | 2.53164E-16 | 0.428198534 |
|                      | Msa.3097.1.S1_at    | 837.4237 | 648.1933 | 870.8082 | 246.5064 | 139.2833 | 256.7805 | 785.475  | 120.0556 | 214.1901 | 65.07425 | 0.001925467 | 3.24518E-52 | 0.272688563 |
|                      | Msa.925.1.S1_at     | 1125.495 | 1160.198 | 1510.154 | 541.865  | 715.652  | 588.3191 | 1265.283 | 212.7737 | 615.2787 | 89.97555 | 0.00819934  | 6.36001E-36 | 0.486277689 |
|                      | Mtr.10131.1.S1_at   | 59.36498 | 92.50877 | 128.2676 | 27.70935 | 38.69873 | 42.80351 | 93.38045 | 34.45958 | 36.40386 | 7.804375 | 0.04915667  | 1.19229E-36 | 0.389844586 |
| IMGA Medtr5g021820.1 | Mtr.10147.1.S1_at   | 86.30758 | 87.67469 | 88.73033 | 26.22608 | 31.22099 | 21.10578 | 87.57086 | 1.214706 | 26.18428 | 5.057735 | 3.3826E-05  | 0           | 0.299006783 |
|                      | Mtr.10192.1.S1_at   | 285.0926 | 214.1641 | 266.4445 | 145.6875 | 117.365  | 89.53165 | 255.2337 | 36.76921 | 117.528  | 28.07829 | 0.006718998 | 1.98655E-17 | 0.460472278 |
|                      | Mtr.10312.1.S1_at   | 185.865  | 228.06   | 59.97546 | 51.19811 | 58.93059 | 47.32549 | 157.9668 | 87.44617 | 52.48473 | 5.908564 | 0.105480292 | 6.1902E-210 | 0.332251613 |
| IMGA Medtr4g079160.1 | Mtr.10331.1.S1_at   | 257.3632 | 338.9229 | 287.2913 | 45.48586 | 64.33581 | 46.54321 | 294.5258 | 41.25833 | 52.12163 | 10.591   | 0.000594285 | 0           | 0.17696794  |
| IMGA AC235757_49.1   | Mtr.10452.1.S1_at   | 87.19976 | 723.664  | 181.1247 | 19.69661 | 120.8145 | 16.79287 | 330.6628 | 343.5737 | 52.43465 | 59.23645 | 0.239069623 | 4.10976E-16 | 0.158574363 |
| IMGA Medtr4g130510.1 | Mtr.10615.1.S1_at   | 280.5803 | 227.2436 | 268.0235 | 104.0316 | 104.8336 | 119.1983 | 258.6158 | 27.88512 | 109.3545 | 8.534408 | 0.000894156 | 0           | 0.422845409 |
| IMGA Medtr5g045300.1 | Mtr.10948.1.S1_at   | 263.0316 | 374.6983 | 85.65847 | 42.32542 | 60.02687 | 24.52143 | 241.1295 | 145.7593 | 42.29124 | 17.75275 | 0.078906496 | 7.76266E-84 | 0.175388101 |
| IMGA Medtr7g116510.2 | Mtr.11001.1.S1_at   | 1144.498 | 698.3471 | 1246.985 | 309.1328 | 103.3244 | 295.516  | 1029.943 | 291.7069 | 235.9911 | 115.0943 | 0.01182668  | 6.63709E-33 | 0.229130129 |
|                      | Mtr.11016.1.S1_at   | 187.5652 | 160.997  | 222.7061 | 84.36498 | 58.25051 | 91.81966 | 190.4228 | 30.95365 | 78.14505 | 17.62775 | 0.005472337 | 2.6761E-28  | 0.410376544 |
| IMGA Medtr5g091690.1 | Mtr.11240.1.S1_at   | 515.1907 | 493.3589 | 581.8056 | 219.3746 | 270.1894 | 250.7928 | 530.1184 | 46.07419 | 246.7856 | 25.64333 | 0.000741705 | 0           | 0.465529205 |
|                      | Mtr.11489.1.S1_at   | 340.811  | 333.2168 | 294.865  | 152.556  | 176.5851 | 133.1206 | 322.9643 | 24.62916 | 154.0872 | 21.77265 | 0.000881616 | 0           | 0.477103074 |
| IMGA Medtr8g076940.1 | Mtr.11744.1.S1_at   | 58.64589 | 48.20463 | 47.72711 | 34.35467 | 18.40492 | 23.90069 | 51.52588 | 6.170732 | 25.55343 | 8.102302 | 0.011537369 | 3.0953E-13  | 0.495933891 |
|                      | Mtr.11798.1.S1_at   | 1293.478 | 966.576  | 1017.709 | 455.5316 | 359.0966 | 495.865  | 1092.588 | 175.8448 | 436.8311 | 70.27575 | 0.003887573 | 9.33278E-59 | 0.399813318 |
|                      | Mtr.11810.1.S1_at   | 763.7488 | 643.0666 | 560.811  | 305.824  | 371.8613 | 281.9462 | 655.8755 | 102.0735 | 319.8772 | 46.57579 | 0.006574693 | 7.94601E-36 | 0.487710194 |
|                      | Mtr.11844.1.S1_at   | 286.5861 | 357.0679 | 261.5693 | 114.2897 | 123.653  | 128.2293 | 301.7411 | 49.52022 | 122.0573 | 7.105453 | 0.003399111 | 0           | 0.404510166 |
| IMGA Medtr2g028530.1 | Mtr.1186.1.S1_s_at  | 940.2665 | 841.2642 | 502.0038 | 435.3703 | 394.3683 | 287.6074 | 761.1782 | 229.8453 | 372.4487 | 76.28116 | 0.049806142 | 1.07956E-18 | 0.489305457 |
| IMGA Medtr7g035200.1 | Mtr.11999.1.S1_at   | 47.12731 | 57.42089 | 64.23656 | 27.87007 | 22.74681 | 27.63001 | 56.26158 | 8.613336 | 26.0823  | 2.891108 | 0.00452599  | 4.5628E-73  | 0.46358978  |
| IMGA Medtr6g069600.1 | Mtr.12069.1.S1_at   | 943.6983 | 1200.695 | 1394.665 | 210.196  | 422.6983 | 137.1295 | 1179.686 | 226.2161 | 256.6746 | 148.3495 | 0.004104079 | 4.44034E-27 | 0.217578753 |
| IMGA Medtr3g031650.1 | Mtr.12393.1.S1_at   | 9252.471 | 9291.395 | 10108.38 | 3905.198 | 3685.532 | 5190.188 | 9550.748 | 483.3142 | 4260.306 | 812.7566 | 0.000634683 | 0           | 0.446070366 |
| IMGA Medtr3g072500.1 | Mtr.12531.1.S1_s_at | 353.3166 | 465.874  | 443.1965 | 166.0064 | 219.7633 | 195.5874 | 420.7957 | 59.52849 | 193.7857 | 26.92372 | 0.003839666 | 2.65001E-48 | 0.460522018 |
| IMGA Medtr4g113650.1 | Mtr.1260.1.S1_at    | 65.57635 | 60.03289 | 59.73813 | 23.69154 | 19.65271 | 24.28384 | 61.78246 | 3.288909 | 22.5427  | 2.52026  | 8.08704E-05 | 0           | 0.364872128 |
| IMGA Medtr3g080410.1 | Mtr.12816.1.S1_at   | 131.3189 | 252.6218 | 280.9742 | 72.48508 | 85.01409 | 85.31655 | 221.6383 | 79.49315 | 80.93857 | 7.322502 | 0.037926617 | 7.3144E-243 | 0.365183157 |
|                      | Mtr.12848.1.S1_at   | 219.643  | 351.436  | 294.5703 | 99.38265 | 135.2324 | 107.7392 | 288.5498 | 66.10241 | 114.1181 | 18.75681 | 0.011718837 | 2.26117E-58 | 0.395488367 |
| IMGA Medtr2g025740.1 | Mtr.12962.1.S1_at   | 356.3775 | 432.9882 | 456.3183 | 153.6491 | 228.1983 | 189.4669 | 415.228  | 52.2839  | 190.4381 | 37.28411 | 0.003736403 | 1.58213E-25 | 0.458635017 |
|                      | Mtr.13037.1.S1_at   | 265.9896 | 477.5316 | 508.7638 | 158.991  | 215.365  | 219.8616 | 417.4284 | 132.0762 | 198.0725 | 33.92022 | 0.049502868 | 4.03815E-29 | 0.474506609 |
|                      | Mtr.13147.1.S1_at   | 332.1513 | 505.4894 | 537.3488 | 118.7996 | 273.2797 | 183.3418 | 458.3298 | 110.4288 | 191.807  | 77.58717 | 0.026768052 | 2.6841E-09  | 0.418491292 |
|                      | Mtr.13545.1.S1_at   | 576.6541 | 678.8736 | 1108.865 | 74.53071 | 23.44978 | 20.95098 | 788.1309 | 282.4269 | 39.64382 | 30.23875 | 0.010306049 | 0           | 0.050301066 |
|                      | Mtr.13640.1.S1_at   | 110.2315 | 110.8905 | 114.865  | 32.3699  | 36.46549 | 34.43294 | 109.329  | 6.459885 | 34.42278 | 2.047817 | 4.38584E-05 | 0           | 0.314855028 |
| IMGA Medtr5g026350.1 | Mtr.13758.1.S1_at   | 133.0316 | 116.8529 | 84.63337 | 45.49787 | 43.57564 | 33.91854 | 111.506  | 24.6382  | 40.99735 | 6.205311 | 0.008606538 | 3.16033E-86 | 0.367669478 |
| IMGA AC225529_15.1   | Mtr.13825.1.S1_at   | 43.85804 | 43.18721 | 33.71574 | 24.03635 | 21.18519 | 14.89069 | 40.25366 | 5.671935 | 20.03741 | 4.679619 | 0.008892487 | 7.28897E-14 | 0.497778587 |



|                      |                     |          |          |          |          |          |          |          |          |          |          |             |             |             |
|----------------------|---------------------|----------|----------|----------|----------|----------|----------|----------|----------|----------|----------|-------------|-------------|-------------|
|                      | Mtr.13898.1.S1_at   | 281.4565 | 268.2421 | 214.6789 | 127.0944 | 123.2691 | 119.4766 | 254.7925 | 35.3621  | 123.28   | 3.808886 | 0.003053007 | 0           | 0.483844819 |
| IMGA Medtr8g092320.1 | Mtr.14131.1.S1_at   | 206.8137 | 179.9978 | 142.4396 | 26.2383  | 17.08997 | 27.84521 | 176.417  | 32.33605 | 23.72449 | 5.80157  | 0.001292704 | 0           | 0.134479597 |
| IMGA Medtr4g112350.1 | Mtr.14236.1.S1_at   | 86.25832 | 137.3038 | 154.5924 | 50.62815 | 62.36498 | 60.43593 | 126.0515 | 35.52954 | 57.80969 | 6.293742 | 0.030622525 | 1.09502E-78 | 0.458619495 |
| IMGA Medtr6g072710.1 | Mtr.14426.1.S1_at   | 71.68805 | 89.13259 | 102.6823 | 39.51044 | 43.3788  | 44.22096 | 87.83432 | 15.53786 | 42.37006 | 2.512051 | 0.007474185 | 1.0592E-215 | 0.482386214 |
| IMGA Medtr2g081300.1 | Mtr.14435.1.S1_at   | 174.3456 | 129.365  | 79.70818 | 45.06011 | 46.50019 | 32.30704 | 127.8063 | 47.33797 | 41.28911 | 7.811958 | 0.035412327 | 5.19388E-82 | 0.323060163 |
| IMGA Medtr3g084250.1 | Mtr.14486.1.S1_at   | 266.8257 | 274.365  | 294.5472 | 46.19833 | 49.3207  | 56.65271 | 278.5793 | 14.33322 | 50.72392 | 5.36659  | 1.34356E-05 | 0           | 0.182080708 |
| IMGA Medtr3g084220.1 | Mtr.14493.1.S1_x_at | 389.3112 | 409.9283 | 474.8539 | 150.6492 | 144.1364 | 151.5376 | 424.6978 | 44.64291 | 148.7744 | 4.041138 | 0.00043833  | 0           | 0.350306472 |
| IMGA Medtr5g022770.1 | Mtr.14580.1.S1_at   | 82.03165 | 76.15099 | 48.19343 | 27.26499 | 32.01437 | 32.01437 | 68.79202 | 18.0796  | 30.43125 | 2.742059 | 0.022092047 | 1.0516E-129 | 0.442365907 |
| IMGA Medtr7g085150.1 | Mtr.14668.1.S1_at   | 757.148  | 1143.147 | 1888.652 | 354.3691 | 276.2079 | 394.1553 | 1262.982 | 575.1918 | 341.5774 | 60.00514 | 0.050869859 | 7.4729E-156 | 0.270453047 |
| IMGA Medtr8g014330.1 | Mtr.14743.1.S1_at   | 42.40145 | 56.4163  | 56.10745 | 22.3994  | 20.98977 | 17.95419 | 51.64173 | 8.003811 | 20.44779 | 2.271625 | 0.002899955 | 4.8473E-125 | 0.395954693 |
| IMGA Medtr3g093020.1 | Mtr.14816.1.S1_at   | 13.58923 | 12.93919 | 20.91394 | 6.800607 | 9.142714 | 5.548303 | 15.81412 | 4.428517 | 7.163875 | 1.824533 | 0.035248513 | 2.18074E-16 | 0.453004923 |
| IMGA Medtr4g108100.1 | Mtr.15618.1.S1_at   | 252.8434 | 352.0316 | 422.6101 | 106.5671 | 191.2751 | 164.7271 | 342.4951 | 85.28422 | 154.1897 | 43.32596 | 0.027038021 | 5.15548E-14 | 0.450195495 |
| IMGA Medtr2g034680.1 | Mtr.15775.1.S1_at   | 1220.292 | 842.8174 | 925.979  | 430.8082 | 275.8713 | 454.8381 | 996.3628 | 198.336  | 387.1725 | 97.13565 | 0.008789816 | 1.73677E-27 | 0.38858588  |
| IMGA Medtr5g035150.1 | Mtr.15901.1.S1_at   | 10.98317 | 15.33302 | 10.92429 | 6.5649   | 5.608835 | 5.723112 | 12.4135  | 2.528553 | 5.965616 | 0.522131 | 0.012393365 | 1.7721E-101 | 0.480575012 |
| IMGA Medtr4g128820.1 | Mtr.16226.1.S1_at   | 38.37654 | 39.48374 | 29.34093 | 17.14126 | 18.91789 | 15.05246 | 35.73374 | 5.563942 | 17.03721 | 1.934814 | 0.005337509 | 7.0402E-63  | 0.476782077 |
| IMGA Medtr4g128770.1 | Mtr.16234.1.S1_at   | 154.9417 | 92.23847 | 94.96132 | 39.94252 | 49.46319 | 44.06442 | 114.0472 | 35.44188 | 44.49004 | 4.774586 | 0.028073952 | 1.7481E-140 | 0.390102081 |
| IMGA Medtr4g106480.1 | Mtr.17068.1.S1_at   | 59.04646 | 58.01553 | 47.2748  | 18.9033  | 14.36409 | 11.75902 | 54.77893 | 6.519179 | 15.0088  | 3.615515 | 0.00076246  | 0           | 0.273988626 |
| IMGA Medtr8g092340.1 | Mtr.17470.1.S1_at   | 89.69702 | 86.3088  | 91.16801 | 11.77501 | 11.55108 | 10.5143  | 89.05795 | 2.491847 | 11.28013 | 0.672614 | 8.06483E-07 | 0           | 0.126660575 |
| IMGA Medtr2g027410.1 | Mtr.17669.1.S1_at   | 16.66875 | 29.23742 | 42.95807 | 10.4312  | 6.626667 | 10.99204 | 29.62141 | 13.14886 | 9.349968 | 2.675061 | 0.058322987 | 1.88044E-49 | 0.315648961 |
| IMGA Medtr1g014120.1 | Mtr.17895.1.S1_at   | 735.0766 | 1414.576 | 1524.631 | 319.9046 | 658.4699 | 475.1035 | 1224.761 | 427.6347 | 484.4927 | 169.4778 | 0.049443524 | 3.86402E-14 | 0.395581289 |
| IMGA Medtr6g012220.1 | Mtr.18494.1.S1_at   | 296.6983 | 360.5141 | 163.2074 | 11.45783 | 11.13576 | 15.88931 | 273.4733 | 100.6828 | 12.82764 | 2.656377 | 0.010970139 | 0           | 0.046906359 |
| IMGA Medtr4g081390.1 | Mtr.18524.1.S1_at   | 57.29717 | 33.21986 | 31.14551 | 16.6695  | 17.79767 | 14.75474 | 40.55418 | 14.5369  | 16.4073  | 1.538316 | 0.045878933 | 9.1131E-163 | 0.404577348 |
| IMGA Medtr8g088080.1 | Mtr.18775.1.S1_s_at | 10.05336 | 14.45963 | 66.11352 | 11.06902 | 7.287546 | 7.656095 | 30.20884 | 31.17232 | 8.670885 | 2.085    | 0.298423144 | 1.36459E-71 | 0.287031422 |
| IMGA Medtr3g086630.1 | Mtr.19208.1.S1_at   | 93.7726  | 109.9765 | 56.76956 | 29.61658 | 33.57795 | 39.28264 | 86.83957 | 27.27262 | 34.15906 | 4.859163 | 0.030107874 | 1.14379E-78 | 0.393358245 |
| IMGA Medtr8g077830.1 | Mtr.19622.1.S1_s_at | 115.0897 | 179.9763 | 46.47147 | 41.42273 | 35.69979 | 28.74245 | 113.8458 | 66.76111 | 35.28832 | 6.350148 | 0.112348292 | 7.4635E-102 | 0.309965895 |
| IMGA Medtr2g083250.1 | Mtr.19874.1.S1_at   | 242.4816 | 366.2348 | 207.1702 | 112.1578 | 108.448  | 109.9114 | 271.9622 | 83.52972 | 110.1724 | 1.868626 | 0.028463112 | 0           | 0.40510195  |
| IMGA Medtr4g072670.1 | Mtr.19878.1.S1_x_at | 207.1983 | 216.1611 | 218.4363 | 31.2798  | 34.5339  | 40.26053 | 213.9319 | 5.94139  | 35.35807 | 4.546737 | 2.04598E-06 | 0           | 0.16527724  |
| IMGA Medtr4g072650.1 | Mtr.19879.1.S1_at   | 78.38246 | 73.01614 | 63.76599 | 17.84967 | 15.45383 | 30.18377 | 71.72153 | 7.393733 | 21.16242 | 7.904018 | 0.001268079 | 0           | 0.29506371  |
| IMGA Medtr4g072640.1 | Mtr.19880.1.S1_at   | 129.1918 | 111.3993 | 92.94537 | 12.95294 | 9.201372 | 17.67123 | 111.1788 | 18.12423 | 13.27518 | 4.244111 | 0.000805403 | 0           | 0.11940385  |
| IMGA Medtr4g072620.1 | Mtr.19881.1.S1_x_at | 146.5804 | 106.1983 | 86.52612 | 56.9605  | 57.80248 | 38.60117 | 113.1016 | 30.61652 | 51.12138 | 10.85099 | 0.029795157 | 4.44803E-23 | 0.451995186 |
| IMGA Medtr4g072530.1 | Mtr.19891.1.S1_s_at | 196.186  | 147.1839 | 178.848  | 33.36835 | 21.20273 | 21.15575 | 174.0727 | 24.84763 | 25.24228 | 7.037421 | 0.000565964 | 0           | 0.145010014 |
| IMGA Medtr4g072450.1 | Mtr.19898.1.S1_x_at | 135.4134 | 119.0378 | 127.2782 | 21.76144 | 20.90513 | 35.09669 | 127.2431 | 8.187864 | 25.92108 | 7.957831 | 0.000104539 | 0           | 0.203713025 |
| IMGA Medtr4g072380.1 | Mtr.19907.1.S1_at   | 61.82004 | 38.82697 | 36.80471 | 15.1594  | 17.88048 | 19.82984 | 45.81724 | 13.89567 | 17.62324 | 2.345826 | 0.025694269 | 3.03352E-96 | 0.384642132 |
| IMGA Medtr4g072310.1 | Mtr.19917.1.S1_at   | 127.8349 | 114.7062 | 95.90417 | 40.39293 | 51.2571  | 38.25191 | 112.8151 | 16.04913 | 43.30064 | 6.973151 | 0.002337814 | 8.39794E-67 | 0.383819666 |
| IMGA Medtr4g072300.1 | Mtr.19918.1.S1_at   | 1300.306 | 1183.93  | 895.7095 | 321.4296 | 354.428  | 298.9119 | 1126.649 | 208.2917 | 324.9231 | 27.92243 | 0.002718938 | 0           | 0.288397949 |
| IMGA Medtr4g072300.1 | Mtr.19918.1.S1_x_at | 1353.799 | 1296.093 | 977.7218 | 348.5831 | 347.3436 | 312.7987 | 1209.205 | 202.5357 | 336.2418 | 20.3118  | 0.001753449 | 0           | 0.278068582 |
| IMGA Medtr4g072270.1 | Mtr.19925.1.S1_x_at | 172.168  | 176.365  | 159.0316 | 53.65425 | 56.6552  | 58.72902 | 169.1882 | 9.0427   | 56.34616 | 2.551463 | 3.15567E-05 | 0           | 0.333038332 |
| IMGA Medtr4g072220.1 | Mtr.19928.1.S1_at   | 1301.618 | 1517.365 | 1066.387 | 419.3217 | 503.7024 | 386.0459 | 1295.123 | 225.559  | 436.3567 | 60.64984 | 0.003117877 | 8.0267E-133 | 0.336922849 |
| IMGA Medtr3g028450.1 | Mtr.19964.1.S1_at   | 61.05007 | 109.8719 | 112.7704 | 50.82909 | 27.1107  | 25.25278 | 94.5641  | 29.06016 | 34.39753 | 14.26044 | 0.032301027 | 2.71682E-13 | 0.363748239 |
| IMGA Medtr1g093720.1 | Mtr.20055.1.S1_at   | 23.81601 | 18.48509 | 22.81376 | 8.327995 | 6.735237 | 11.59617 | 21.70495 | 2.833152 | 8.886466 | 2.47812  | 0.004132566 | 3.26826E-19 | 0.409421147 |
| IMGA Medtr1g075180.1 | Mtr.20408.1.S1_s_at | 71.45299 | 91.36798 | 109.782  | 33.94361 | 36.12978 | 56.91569 | 90.86766 | 19.1694  | 42.32969 | 12.67905 | 0.021620091 | 3.3424E-11  | 0.465838959 |
| IMGA Medtr4g038440.1 | Mtr.20438.1.S1_at   | 8258.741 | 11082.44 | 10224.74 | 1774.99  | 2331.657 | 1942.266 | 9855.307 | 1447.645 | 2016.305 | 285.6237 | 0.000774892 | 0           | 0.204590742 |
| IMGA Medtr3g084240.1 | Mtr.20619.1.S1_x_at | 926.5662 | 1019.019 | 958.7981 | 236.2988 | 253.865  | 212.6983 | 968.1278 | 46.92729 | 234.2874 | 20.65691 | 1.57162E-05 | 0           | 0.242000449 |
| IMGA Medtr3g084230.1 | Mtr.20620.1.S1_x_at | 315.6073 | 353.1176 | 397.5816 | 76.94599 | 67.7765  | 62.90656 | 355.4355 | 41.03625 | 69.20968 | 7.128595 | 0.000285366 | 0           | 0.194717968 |
| IMGA Medtr3g084200.1 | Mtr.20624.1.S1_at   | 173.6891 | 212.8687 | 151.795  | 51.69831 | 79.50074 | 46.2489  | 179.4509 | 30.94187 | 59.14932 | 17.83422 | 0.004300824 | 1.54538E-31 | 0.329612728 |
| IMGA Medtr3g084190.1 | Mtr.20625.1.S1_x_at | 381.6462 | 406.7256 | 403.365  | 86.36498 | 102.8274 | 100.1888 | 397.2456 | 13.61356 | 96.4604  | 8.841877 | 5.61907E-06 | 0           | 0.242823081 |
| IMGA Medtr3g084150.1 | Mtr.20626.1.S1_s_at | 265.5777 | 321.8538 | 309.3425 | 62.27606 | 80.74587 | 79.23564 | 298.9246 | 29.54909 | 74.08585 | 10.25542 | 0.000239297 | 0           | 0.247841244 |
| IMGA Medtr3g084170.1 | Mtr.20627.1.S1_x_at | 411.531  | 428.7094 | 415.8624 | 107.4086 | 96.60437 | 91.02898 | 418.7009 | 8.934015 | 98.34732 | 8.32775  | 1.40391E-06 | 0           | 0.234886793 |
| IMGA Medtr1g031530.1 | Mtr.20947.1.S1_x_at | 19.65755 | 30.37514 | 17.95419 | 13.41394 | 10.23583 | 9.852766 | 22.66229 | 6.733598 | 11.16751 | 1.954868 | 0.046891037 | 2.32515E-24 | 0.492779269 |
| IMGA Medtr1g025780.1 | Mtr.20992.1.S1_at   | 505.0203 | 476.9954 | 521.8867 | 170.7253 | 114.0316 | 141.1983 | 501.3008 | 22.67562 | 141.9851 | 28.35501 | 6.7947E-05  | 0           | 0.283233295 |

|                      |                     |          |          |          |          |          |          |          |          |          |          |             |             |             |
|----------------------|---------------------|----------|----------|----------|----------|----------|----------|----------|----------|----------|----------|-------------|-------------|-------------|
| IMGA Medtr1g025780.1 | Mtr.20993.1.S1_at   | 109.0087 | 93.78926 | 117.1272 | 36.76636 | 28.65854 | 29.6776  | 106.6417 | 11.84765 | 31.70083 | 4.416369 | 0.000507677 | 0           | 0.297264816 |
| IMGA Medtr4g098800.1 | Mtr.21006.1.S1_at   | 172.3823 | 193.5959 | 110.4656 | 32.56818 | 42.30945 | 21.59912 | 158.8146 | 43.19406 | 32.15891 | 10.36123 | 0.007824026 | 1.7089E-99  | 0.202493403 |
| IMGA Medtr3g071890.2 | Mtr.21261.1.S1_s_at | 103.4407 | 137.9068 | 94.8313  | 57.54218 | 37.42143 | 45.365   | 112.0596 | 22.7945  | 46.7762  | 10.13434 | 0.010554896 | 6.57995E-29 | 0.41742258  |
| IMGA Medtr2g087840.1 | Mtr.21521.1.S1_at   | 125.0174 | 214.0036 | 219.9823 | 57.75402 | 105.5802 | 104.5179 | 186.3345 | 53.18619 | 89.28405 | 27.31097 | 0.048242449 | 7.51263E-10 | 0.479160182 |
| IMGA Medtr5g019950.1 | Mtr.21616.1.S1_at   | 131.2322 | 203.5316 | 58.89649 | 54.03165 | 41.62972 | 35.41342 | 131.2201 | 72.31758 | 43.69159 | 9.478825 | 0.106193081 | 1.40831E-57 | 0.332964181 |
| IMGA Medtr4g127620.1 | Mtr.22448.1.S1_s_at | 50.95187 | 83.68131 | 91.87892 | 28.14781 | 44.18607 | 33.6984  | 75.50403 | 21.65425 | 35.34409 | 8.144794 | 0.039682467 | 1.33868E-17 | 0.468108653 |
| IMGA Medtr2g089130.1 | Mtr.23279.1.S1_at   | 38.54565 | 40.0275  | 40.8193  | 14.82385 | 12.14628 | 8.344153 | 39.79748 | 1.154149 | 11.77143 | 3.25607  | 0.000148838 | 0           | 0.295783189 |
| IMGA Medtr3g099740.1 | Mtr.2338.1.S1_at    | 129.365  | 155.3442 | 94.53165 | 57.11777 | 62.38348 | 69.31206 | 126.4136 | 30.51351 | 62.93777 | 6.116012 | 0.0241687   | 2.9877E-72  | 0.497871788 |
| IMGA Medtr2g097950.1 | Mtr.23402.1.S1_at   | 76.63864 | 109.0963 | 144.1203 | 37.557   | 22.07341 | 50.23723 | 109.9517 | 33.74897 | 36.62255 | 14.10515 | 0.025529991 | 2.16639E-19 | 0.33307839  |
| IMGA Medtr4g116360.1 | Mtr.24683.1.S1_s_at | 81.54089 | 89.92011 | 64.31341 | 21.71384 | 14.7484  | 17.88907 | 78.59147 | 13.05565 | 18.1171  | 3.488312 | 0.001492774 | 4.3284E-198 | 0.230522504 |
| IMGA Medtr7g074820.1 | Mtr.25013.1.S1_at   | 137.425  | 149.2531 | 93.22084 | 72.35659 | 50.85687 | 48.5008  | 126.633  | 29.53396 | 57.23809 | 13.1459  | 0.02050931  | 6.06346E-20 | 0.451999784 |
| IMGA Medtr5g032660.1 | Mtr.25132.1.S1_at   | 134.67   | 113.03   | 124.8811 | 54.3285  | 64.3544  | 64.83602 | 124.1937 | 10.83635 | 61.17297 | 5.932375 | 0.000905711 | 0           | 0.492560985 |
| IMGA Medtr5g024560.1 | Mtr.25341.1.S1_at   | 353.5821 | 267.0056 | 289.234  | 136.6636 | 73.34723 | 108.6205 | 303.2739 | 44.96346 | 106.2105 | 31.72692 | 0.003436676 | 5.42313E-27 | 0.350212957 |
| IMGA Medtr5g024560.1 | Mtr.25341.1.S1_x_at | 291.5316 | 241.9995 | 238.1184 | 120.6983 | 75.3193  | 107.251  | 257.2165 | 29.78107 | 101.0896 | 23.30851 | 0.002023877 | 0           | 0.393013459 |
| IMGA Medtr5g046750.1 | Mtr.25344.1.S1_at   | 163.6983 | 184.2113 | 169.3469 | 85.32722 | 69.78416 | 90.9649  | 172.4188 | 10.59593 | 82.02543 | 10.96961 | 0.000507712 | 0           | 0.475733539 |
| IMGA Medtr4g037560.1 | Mtr.25652.1.S1_at   | 1534.479 | 1445.292 | 2592.338 | 719.9775 | 244.4436 | 511.4398 | 1857.37  | 638.0616 | 491.9536 | 238.3651 | 0.025534346 | 3.35232E-23 | 0.264865738 |
| IMGA Medtr4g037480.1 | Mtr.25657.1.S1_at   | 589.953  | 471.5803 | 753.4593 | 237.4288 | 85.29055 | 188.7603 | 604.9975 | 141.5404 | 170.4932 | 77.69671 | 0.009582318 | 3.45234E-22 | 0.281808126 |
| IMGA Medtr4g072980.1 | Mtr.25922.1.S1_at   | 73.46352 | 79.40138 | 81.37048 | 14.47373 | 27.22738 | 17.66167 | 78.07846 | 4.116136 | 19.78759 | 6.637289 | 0.00020653  | 0           | 0.253432156 |
| IMGA Medtr4g072820.1 | Mtr.25931.1.S1_x_at | 318.7938 | 273.5678 | 272.9458 | 62.0849  | 53.5911  | 63.21323 | 288.4358 | 26.2926  | 59.62974 | 5.259963 | 0.000121988 | 0           | 0.20673489  |
| IMGA Medtr4g072730.1 | Mtr.25939.1.S1_at   | 155.5368 | 134.234  | 135.9072 | 31.7482  | 32.4469  | 46.00913 | 141.8927 | 11.84574 | 36.73474 | 8.03945  | 0.000219875 | 0           | 0.258890999 |
|                      | Mtr.25941.1.S1_at   | 38.398   | 52.00054 | 64.19831 | 20.69868 | 11.77582 | 16.48928 | 51.53228 | 12.90653 | 16.32126 | 4.463801 | 0.011110902 | 1.69781E-42 | 0.316719077 |
| IMGA Medtr3g069690.1 | Mtr.2625.1.S1_at    | 13.5545  | 20.09972 | 17.60452 | 6.986691 | 5.711567 | 7.615588 | 17.08625 | 3.303246 | 6.771282 | 0.970116 | 0.00656347  | 9.81806E-76 | 0.396300112 |
| IMGA Medtr7g090140.1 | Mtr.26276.1.S1_at   | 38.88221 | 13.21743 | 27.22738 | 10.89288 | 5.989786 | 6.981003 | 26.44234 | 12.85039 | 7.954557 | 2.592478 | 0.071003103 | 4.76652E-35 | 0.300826499 |
| IMGA Medtr7g113160.1 | Mtr.26323.1.S1_at   | 331.8834 | 489.6409 | 501.5383 | 157.4733 | 289.5574 | 175.256  | 441.0209 | 94.70285 | 207.4289 | 71.67898 | 0.027114477 | 1.65646E-08 | 0.470338048 |
| IMGA Medtr6g069600.1 | Mtr.26465.1.S1_at   | 476.9413 | 606.6023 | 803.0316 | 112.4037 | 163.5874 | 75.32041 | 641.1918 | 183.9999 | 117.1038 | 44.3208  | 0.008671985 | 3.16231E-93 | 0.182634679 |
| IMGA Medtr6g069600.1 | Mtr.26465.1.S1_s_at | 1343.641 | 1765.247 | 2255.436 | 307.1688 | 456.4552 | 213.92   | 1788.108 | 456.3274 | 325.848  | 122.3418 | 0.005842882 | 3.32913E-95 | 0.182230602 |
|                      | Mtr.26785.1.S1_at   | 484.1959 | 443.8997 | 409.3198 | 167.9762 | 241.3482 | 138.7497 | 445.8051 | 37.47438 | 182.6914 | 52.85842 | 0.00215336  | 0           | 0.409800941 |
| IMGA Medtr2g100880.1 | Mtr.27132.1.S1_at   | 53.84878 | 88.51349 | 34.85063 | 13.34335 | 14.53077 | 19.94683 | 59.07097 | 27.20991 | 15.94032 | 3.520169 | 0.052834074 | 6.0093E-100 | 0.269850267 |
| IMGA Medtr2g100880.1 | Mtr.27132.1.S1_s_at | 82.86506 | 204.002  | 64.89819 | 18.13365 | 23.69896 | 21.51155 | 117.2551 | 75.66025 | 21.11472 | 2.803796 | 0.092716538 | 0           | 0.180075071 |
| IMGA Medtr2g027410.1 | Mtr.27184.1.S1_at   | 33.33238 | 60.00001 | 61.03979 | 23.269   | 26.79814 | 18.77387 | 51.45739 | 15.70533 | 22.947   | 4.021817 | 0.038178782 | 1.18361E-34 | 0.445941814 |
|                      | Mtr.27212.1.S1_at   | 65.69831 | 79.94332 | 86.57025 | 36.19174 | 37.29729 | 36.9152  | 77.40396 | 10.66516 | 36.80141 | 0.561492 | 0.002754109 | 0           | 0.475446114 |
| IMGA Medtr3g019390.1 | Mtr.27305.1.S1_at   | 22.51015 | 22.80882 | 31.19642 | 13.82872 | 9.193088 | 11.00271 | 25.50513 | 4.931062 | 11.34151 | 2.336311 | 0.010856444 | 8.61046E-26 | 0.444675502 |
|                      | Mtr.27494.1.S1_at   | 205.7216 | 283.5748 | 249.2592 | 112.2483 | 115.236  | 140.6824 | 246.1852 | 39.01756 | 122.7222 | 15.62556 | 0.007041851 | 1.23901E-42 | 0.498495517 |
|                      | Mtr.27729.1.S1_at   | 18.25508 | 20.84196 | 13.43167 | 8.663264 | 7.597883 | 8.107094 | 17.50957 | 3.760978 | 8.122747 | 0.532863 | 0.012845762 | 2.039E-204  | 0.463903336 |
|                      | Mtr.27931.1.S1_at   | 115.8698 | 96.16717 | 107.4002 | 44.94082 | 51.86498 | 36.73869 | 106.4791 | 9.883579 | 44.51483 | 7.572138 | 0.000995723 | 0           | 0.418061814 |
| IMGA Medtr6g045140.1 | Mtr.28492.1.S1_at   | 302.9513 | 351.9356 | 314.1642 | 191.4302 | 130.5133 | 146.145  | 323.017  | 25.66406 | 156.0295 | 31.6385  | 0.002078913 | 0           | 0.483037976 |
|                      | Mtr.28691.1.S1_at   | 66.33202 | 59.99491 | 58.13771 | 33.86814 | 27.75002 | 25.36623 | 61.48822 | 4.296412 | 28.9948  | 4.385516 | 0.000786199 | 0           | 0.471550459 |
|                      | Mtr.29286.1.S1_at   | 83.18267 | 115.2315 | 91.69831 | 31.95891 | 44.55379 | 47.91155 | 96.70415 | 16.60046 | 41.47475 | 8.410233 | 0.006789223 | 5.61841E-30 | 0.428882783 |
| IMGA Medtr7g105070.1 | Mtr.29418.1.S1_at   | 183.5058 | 165.5759 | 80.86498 | 60.90059 | 48.58166 | 47.61541 | 143.3156 | 54.82179 | 52.36589 | 7.40704  | 0.04650811  | 2.2696E-100 | 0.365388665 |
| IMGA Medtr1g092420.1 | Mtr.3015.1.S1_at    | 248.4253 | 203.5206 | 223.0307 | 123.1231 | 92.86847 | 111.942  | 224.9922 | 22.51654 | 109.3112 | 15.29795 | 0.001815034 | 0           | 0.485844382 |
| IMGA Medtr7g111280.1 | Mtr.30198.1.S1_at   | 200.3942 | 219.3685 | 196.6122 | 47.95062 | 95.27504 | 59.69501 | 205.4583 | 12.19408 | 67.64022 | 24.64234 | 0.000968709 | 0           | 0.329216348 |
| IMGA Medtr7g090310.1 | Mtr.30679.1.S1_at   | 44.0245  | 51.48199 | 28.76494 | 21.58986 | 21.56142 | 17.57475 | 41.42381 | 11.57967 | 20.24201 | 2.309956 | 0.035973138 | 8.38586E-57 | 0.488656431 |
| IMGA Medtr8g011460.1 | Mtr.31281.1.S1_at   | 179.9465 | 291.3648 | 302.3223 | 75.1462  | 149.1307 | 128.5456 | 257.8779 | 67.71257 | 117.6075 | 38.18583 | 0.035344457 | 1.98563E-10 | 0.456058958 |
| IMGA Medtr2g098060.1 | Mtr.31592.1.S1_at   | 139.5674 | 155.3515 | 125.2092 | 59.77722 | 36.83773 | 17.31544 | 140.0427 | 15.07673 | 37.97679 | 21.25379 | 0.002464553 | 0           | 0.27118009  |
| IMGA Medtr2g018990.1 | Mtr.31632.1.S1_at   | 404.6983 | 426.3861 | 318.5316 | 165.9311 | 164.6983 | 109.8461 | 383.2054 | 57.04917 | 146.8252 | 32.03076 | 0.003326042 | 2.06243E-37 | 0.383150114 |
|                      | Mtr.31658.1.S1_s_at | 740.4281 | 715.7207 | 753.6686 | 343.1983 | 376.8585 | 292.7031 | 736.6058 | 19.26054 | 337.5867 | 42.35742 | 0.000119643 | 0           | 0.45830032  |
| IMGA Medtr8g040520.1 | Mtr.31772.1.S1_s_at | 169.0573 | 153.9126 | 195.2443 | 61.69225 | 62.28056 | 57.30311 | 172.7381 | 20.91023 | 60.42531 | 2.719857 | 0.000767228 | 0           | 0.349808818 |
| IMGA Medtr4g084280.1 | Mtr.32155.1.S1_at   | 624.2482 | 568.2104 | 540.3518 | 239.2306 | 253.4829 | 239.23   | 577.6035 | 42.72963 | 270.6478 | 42.67316 | 0.000918279 | 0           | 0.468570289 |
|                      | Mtr.32301.1.S1_at   | 280.4098 | 205.9335 | 243.9122 | 111.4827 | 77.81395 | 80.62148 | 243.4185 | 37.24062 | 89.97272 | 18.68104 | 0.003098216 | 6.22665E-46 | 0.369621573 |
|                      | Mtr.32529.1.S1_at   | 53.95404 | 57.61718 | 53.68868 | 26.69933 | 28.96796 | 21.84452 | 55.08663 | 2.195528 | 25.83727 | 3.639121 | 0.000283754 | 0           | 0.469029765 |



|                      |                     |          |          |          |          |          |          |          |          |          |          |             |             |             |
|----------------------|---------------------|----------|----------|----------|----------|----------|----------|----------|----------|----------|----------|-------------|-------------|-------------|
| IMGA Medtr7g067330.1 | Mtr.32576.1.S1_at   | 182.0534 | 182.0376 | 255.2302 | 102.3325 | 106.16   | 69.68194 | 206.4404 | 42.25319 | 92.72481 | 20.04727 | 0.013570113 | 8.80128E-23 | 0.449160135 |
| IMGA Medtr2g089300.1 | Mtr.3259.1.S1_at    | 50.01966 | 50.69832 | 30.83503 | 28.38135 | 18.10809 | 14.19792 | 43.851   | 11.27727 | 20.22912 | 7.325742 | 0.03831004  | 2.33697E-08 | 0.461314759 |
|                      | Mtr.32691.1.S1_at   | 509.8228 | 496.2552 | 544.5006 | 209.4677 | 195.9912 | 206.6489 | 516.8596 | 24.88054 | 204.0359 | 7.108072 | 3.07413E-05 | 0           | 0.394760855 |
| IMGA AC232874_1004.1 | Mtr.32965.1.S1_at   | 278.676  | 235.9415 | 154.0325 | 106.4236 | 127.8327 | 73.22222 | 222.8833 | 63.33947 | 102.4928 | 27.5166  | 0.039182005 | 3.5076E-14  | 0.459849641 |
|                      | Mtr.33530.1.S1_at   | 83.47604 | 84.36498 | 68.35299 | 40.12166 | 34.34208 | 33.70154 | 78.73133 | 8.998896 | 36.05509 | 3.536284 | 0.001572783 | 5.08002E-97 | 0.457951015 |
| IMGA Medtr7g117980.1 | Mtr.33765.1.S1_s_at | 137.365  | 151.068  | 124.1904 | 66.70628 | 56.13734 | 71.48438 | 137.5411 | 13.43968 | 64.776   | 7.8535   | 0.001264758 | 0           | 0.470957312 |
| IMGA Medtr5g039180.1 | Mtr.33785.1.S1_at   | 505.7774 | 385.3381 | 359.364  | 169.5085 | 144.3991 | 139.6505 | 416.8265 | 78.1208  | 151.186  | 16.04434 | 0.004480679 | 7.3965E-181 | 0.36270736  |
|                      | Mtr.33845.1.S1_at   | 205.4839 | 182.6095 | 243.0335 | 51.57145 | 54.86498 | 52.69831 | 210.3756 | 30.50757 | 53.04491 | 1.6739   | 0.000873672 | 0           | 0.252143817 |
| IMGA Medtr5g017350.1 | Mtr.33852.1.S1_at   | 47.05817 | 39.57198 | 41.91803 | 21.55067 | 20.7688  | 19.60881 | 42.84939 | 3.829011 | 20.64276 | 0.977047 | 0.000623957 | 0           | 0.481751588 |
|                      | Mtr.34752.1.S1_s_at | 34.70051 | 28.23361 | 15.62    | 7.595207 | 7.480983 | 7.127864 | 26.1847  | 9.703864 | 7.401351 | 0.243636 | 0.028526409 | 0           | 0.282659351 |
| IMGA Medtr4g097670.1 | Mtr.35240.1.S1_s_at | 763.5096 | 704.9913 | 727.9272 | 391.8484 | 389.467  | 184.8329 | 732.1427 | 29.48602 | 322.0494 | 118.839  | 0.004391578 | 0           | 0.439872458 |
| IMGA Medtr1g098430.1 | Mtr.35246.1.S1_at   | 20.23565 | 26.76013 | 30.72381 | 12.58378 | 11.45783 | 14.66346 | 25.90653 | 5.29593  | 12.90169 | 1.626285 | 0.015274525 | 1.26434E-43 | 0.498009202 |
|                      | Mtr.35334.1.S1_s_at | 38.51357 | 181.1422 | 103.4758 | 18.87913 | 40.9656  | 19.47184 | 107.7105 | 71.40856 | 26.43886 | 12.58402 | 0.124181612 | 4.76722E-29 | 0.245462146 |
|                      | Mtr.35592.1.S1_at   | 106.7752 | 146.309  | 147.6983 | 63.98047 | 72.24147 | 63.69831 | 133.5942 | 23.23632 | 66.64008 | 4.852996 | 0.008128992 | 3.362E-126  | 0.49882483  |
|                      | Mtr.35605.1.S1_at   | 668.0316 | 729.6983 | 526.2659 | 319.9533 | 311.8025 | 327.258  | 641.332  | 104.3113 | 319.6713 | 7.73163  | 0.005979535 | 0           | 0.49844898  |
|                      | Mtr.35647.1.S1_at   | 167.6429 | 154.7598 | 124.2949 | 47.63633 | 33.5705  | 30.17868 | 148.8992 | 22.2603  | 37.1285  | 9.256726 | 0.001305097 | 0           | 0.249353249 |
|                      | Mtr.35957.1.S1_at   | 183.0557 | 169.8105 | 196.7183 | 92.39281 | 86.14586 | 75.39477 | 183.1948 | 13.45447 | 84.64448 | 8.5979   | 0.000433766 | 0           | 0.462046215 |
|                      | Mtr.36075.1.S1_at   | 333.5825 | 369.4746 | 383.4558 | 124.9045 | 194.6044 | 151.0378 | 362.171  | 25.72632 | 156.8489 | 35.21143 | 0.0012306   | 0           | 0.43307965  |
|                      | Mtr.36075.1.S1_x_at | 345.7443 | 383.8477 | 384.2745 | 136.4661 | 202.109  | 165.6789 | 371.2889 | 22.12324 | 168.0847 | 32.8875  | 0.000888565 | 0           | 0.452705908 |
|                      | Mtr.36078.1.S1_at   | 202.3014 | 242.121  | 241.6301 | 115.4892 | 126.7409 | 99.85295 | 228.6842 | 22.84946 | 114.0277 | 13.50342 | 0.001706001 | 0           | 0.498625179 |
|                      | Mtr.36333.1.S1_at   | 1473.469 | 1394.707 | 909.6767 | 622.4203 | 822.0316 | 415.7288 | 1259.284 | 305.3196 | 620.0602 | 203.1617 | 0.039202262 | 5.04571E-08 | 0.492390925 |
|                      | Mtr.36426.1.S1_at   | 189.8434 | 193.9399 | 185.6053 | 89.96297 | 95.45644 | 99.26118 | 189.7962 | 4.167508 | 94.89353 | 4.674594 | 1.25204E-05 | 0           | 0.499975922 |
|                      | Mtr.36871.1.S1_at   | 98.33874 | 88.32027 | 66.54517 | 40.25432 | 43.50026 | 30.96089 | 84.40139 | 16.25503 | 38.23849 | 6.508195 | 0.010288317 | 1.08374E-34 | 0.453055218 |
|                      | Mtr.37181.1.S1_at   | 1402.553 | 938.6412 | 839.4191 | 507.5349 | 384.7875 | 538.6947 | 1060.204 | 300.6045 | 477.0057 | 81.36879 | 0.031566238 | 2.18827E-35 | 0.449918688 |
|                      | Mtr.37188.1.S1_at   | 534.865  | 579.3736 | 645.1983 | 205.4935 | 168.0513 | 221.864  | 586.479  | 55.50879 | 198.4696 | 27.58539 | 0.000410637 | 0           | 0.338408727 |
|                      | Mtr.37355.1.S1_at   | 3282.34  | 3307.841 | 3339.698 | 1678.763 | 1770.032 | 1485.41  | 3309.96  | 28.73776 | 1644.735 | 145.3299 | 4.10349E-05 | 0           | 0.49690485  |
|                      | Mtr.37375.1.S1_at   | 421.1188 | 1366.084 | 721.1994 | 142.0316 | 335.1481 | 209.532  | 836.134  | 482.8532 | 228.9039 | 98.00479 | 0.099682174 | 7.22917E-27 | 0.273764606 |
| IMGA Medtr8g087710.1 | Mtr.37525.1.S1_at   | 153.3234 | 108.2718 | 153.5963 | 79.50937 | 59.09506 | 49.49226 | 138.3972 | 26.08969 | 62.6989  | 15.32962 | 0.012321701 | 1.20003E-17 | 0.453036054 |
|                      | Mtr.37590.1.S1_s_at | 5164.547 | 3982.801 | 4548.112 | 1700.198 | 2229.721 | 1335.434 | 4565.153 | 591.0574 | 1755.118 | 449.6657 | 0.002803199 | 2.65327E-27 | 0.384459766 |
| IMGA Medtr2g035780.1 | Mtr.37806.1.S1_at   | 828.6852 | 711.5232 | 639.0316 | 293.7039 | 249.5077 | 333.6889 | 726.4133 | 95.69954 | 292.3002 | 42.10812 | 0.001980842 | 2.57016E-71 | 0.402388215 |
|                      | Mtr.37919.1.S1_at   | 477.0225 | 385.177  | 437.1647 | 185.8198 | 235.3128 | 207.763  | 433.1214 | 46.05606 | 209.6319 | 24.79938 | 0.001778541 | 0           | 0.484002636 |
| IMGA Medtr4g115920.2 | Mtr.38047.1.S1_at   | 201.139  | 662.0615 | 394.6585 | 115.9564 | 164.7778 | 117.1983 | 419.2863 | 231.4461 | 131.9775 | 28.45208 | 0.099753595 | 1.70076E-68 | 0.314767015 |
|                      | Mtr.38088.1.S1_at   | 157.0895 | 101.4916 | 199.7933 | 71.36498 | 44.71355 | 75.03165 | 152.7914 | 49.2916  | 63.70339 | 16.54756 | 0.041238698 | 1.11045E-20 | 0.416930375 |
|                      | Mtr.38270.1.S1_at   | 40.78013 | 43.15285 | 66.53737 | 15.34752 | 18.70559 | 24.91468 | 50.15678 | 14.23552 | 19.65593 | 4.853863 | 0.024616178 | 1.37552E-27 | 0.391889826 |
|                      | Mtr.38407.1.S1_at   | 1204.365 | 1305.349 | 1639.408 | 467.9257 | 436.8325 | 379.4801 | 1383.041 | 227.6899 | 428.0794 | 44.86781 | 0.002048715 | 1.6957E-297 | 0.30952045  |
|                      | Mtr.38426.1.S1_at   | 182.882  | 304.0341 | 328.9643 | 77.36498 | 130.1075 | 152.5316 | 271.9601 | 78.14448 | 120.0014 | 38.58895 | 0.039164181 | 9.06523E-12 | 0.441246152 |
| IMGA Medtr6g090590.1 | Mtr.38431.1.S1_at   | 135.6618 | 230.4651 | 245.9643 | 67.19883 | 108.2892 | 88.12041 | 204.0304 | 59.71395 | 87.86948 | 20.54634 | 0.033342836 | 1.21462E-22 | 0.430668584 |
|                      | Mtr.38471.1.S1_at   | 1233.406 | 996.6193 | 702.5045 | 434.8453 | 421.4866 | 345.6624 | 977.51   | 265.9663 | 400.6647 | 48.09947 | 0.020897137 | 7.74572E-96 | 0.409883001 |
| IMGA Medtr1g087880.1 | Mtr.38511.1.S1_at   | 427.839  | 304.2073 | 320.3975 | 161.5929 | 154.8341 | 171.582  | 350.8146 | 67.19452 | 162.6697 | 8.425755 | 0.0085724   | 0           | 0.46369126  |
|                      | Mtr.38539.1.S1_at   | 92.99409 | 142.797  | 138.7109 | 47.86499 | 40.30999 | 68.86498 | 124.834  | 27.64974 | 52.34665 | 14.79564 | 0.016081535 | 2.14376E-17 | 0.419330148 |
| IMGA Medtr5g065010.1 | Mtr.38650.1.S1_at   | 685.4471 | 471.383  | 466.5027 | 126.2028 | 125.3727 | 121.7345 | 541.1109 | 125.0226 | 124.4367 | 2.376656 | 0.004474165 | 0           | 0.229965236 |
| IMGA Medtr8g070540.1 | Mtr.38972.1.S1_at   | 740.4687 | 960.9483 | 1120.032 | 234.8635 | 509.6427 | 348.0267 | 940.4829 | 190.6073 | 364.1776 | 138.0997 | 0.013255074 | 4.90029E-13 | 0.387224112 |
| IMGA Medtr4g010340.1 | Mtr.39011.1.S1_at   | 528.4194 | 557.0316 | 108.0629 | 72.96461 | 125.7491 | 105.0457 | 397.838  | 251.36   | 101.2531 | 26.59584 | 0.111914649 | 4.0132E-83  | 0.254508497 |
|                      | Mtr.39027.1.S1_at   | 26.52753 | 37.95617 | 26.2383  | 10.74003 | 18.10946 | 10.32911 | 30.24067 | 6.683391 | 13.05953 | 4.378188 | 0.020392703 | 1.06819E-11 | 0.431853241 |
| IMGA Medtr7g065510.1 | Mtr.39126.1.S1_at   | 11.6676  | 10.60022 | 11.23601 | 5.325648 | 4.381649 | 4.71533  | 11.16794 | 0.536938 | 4.807542 | 0.478707 | 0.000106044 | 0           | 0.430476938 |
|                      | Mtr.39376.1.S1_at   | 58.65404 | 67.07598 | 40.36524 | 27.43978 | 18.78704 | 30.33431 | 55.36509 | 13.65572 | 25.52038 | 6.008156 | 0.025703206 | 7.71713E-18 | 0.460947143 |
| IMGA Medtr7g101290.1 | Mtr.39530.1.S1_s_at | 392.8565 | 306.9765 | 362.8676 | 177.2569 | 165.0239 | 181.7161 | 354.2335 | 43.58617 | 174.6656 | 8.642539 | 0.002192725 | 1.3274E-283 | 0.493080411 |
| IMGA Medtr3g098980.1 | Mtr.39535.1.S1_at   | 53.24757 | 49.34538 | 52.22818 | 24.03677 | 24.62714 | 26.70044 | 51.60704 | 2.023887 | 25.12145 | 1.398943 | 4.87026E-05 | 0           | 0.486783322 |
|                      | Mtr.39804.1.S1_at   | 29.35663 | 58.36498 | 59.21013 | 16.61771 | 21.84336 | 20.80038 | 48.97725 | 16.99721 | 19.75382 | 2.76557  | 0.042419707 | 7.9225E-75  | 0.403326399 |
| IMGA AC225518_18.2   | Mtr.40137.1.S1_s_at | 1071.94  | 1127.859 | 1361.512 | 258.3521 | 234.1164 | 196.9108 | 1187.104 | 153.6082 | 229.7931 | 30.94799 | 0.000451327 | 0           | 0.19357456  |

|                      |                     |          |          |          |          |          |          |          |          |          |          |             |             |             |
|----------------------|---------------------|----------|----------|----------|----------|----------|----------|----------|----------|----------|----------|-------------|-------------|-------------|
|                      | Mtr.40143.1.S1_at   | 20.10334 | 28.09201 | 17.94461 | 7.819725 | 12.33316 | 9.126064 | 22.04666 | 5.345536 | 9.759651 | 2.322467 | 0.021743244 | 5.03093E-20 | 0.442681698 |
|                      | Mtr.40190.1.S1_at   | 220.1856 | 251.0555 | 181.8763 | 113.3249 | 104.1811 | 73.09395 | 217.7058 | 34.65621 | 96.86662 | 21.08928 | 0.006701935 | 3.25872E-23 | 0.444942749 |
| IMGA Medtr5g016320.1 | Mtr.40263.1.S1_at   | 90.53596 | 104.1354 | 105.6983 | 36.53094 | 26.38358 | 48.20882 | 100.1232 | 8.33951  | 37.04112 | 10.92156 | 0.001355046 | 0           | 0.369955268 |
| IMGA Medtr4g132020.1 | Mtr.40306.1.S1_at   | 1024.115 | 942.1604 | 949.5626 | 502.6202 | 377.3338 | 280.0316 | 971.946  | 45.33101 | 386.6619 | 111.5871 | 0.001090859 | 0           | 0.397822388 |
| IMGA Medtr3g064420.1 | Mtr.40695.1.S1_at   | 1363.911 | 1105.35  | 1333.625 | 855.2842 | 411.0033 | 418.3687 | 1267.629 | 141.3507 | 561.5521 | 254.4061 | 0.0136729   | 0           | 0.442994055 |
| IMGA Medtr3g064420.1 | Mtr.40695.1.S1_s_at | 772.0437 | 638.9089 | 838.8918 | 513.3473 | 254.9143 | 223.7528 | 749.9481 | 101.8059 | 330.6715 | 158.9673 | 0.01834945  | 9.80105E-13 | 0.440925768 |
| IMGA Medtr7g072560.1 | Mtr.40715.1.S1_at   | 565.7893 | 611.9814 | 506.7536 | 288.3325 | 215.453  | 261.0861 | 561.5081 | 52.74436 | 254.9572 | 36.82429 | 0.001175258 | 0           | 0.454057923 |
|                      | Mtr.40946.1.S1_at   | 449.2439 | 359.0255 | 789.7825 | 18.46249 | 55.44076 | 5.38403  | 532.6839 | 227.1774 | 26.42909 | 25.96188 | 0.01854118  | 4.6135E-250 | 0.049614958 |
| IMGA Medtr8g070540.1 | Mtr.40990.1.S1_s_at | 145.9144 | 150.9126 | 218.6821 | 53.52289 | 80.58472 | 70.50573 | 171.8364 | 40.64648 | 68.20444 | 13.6769  | 0.013857436 | 2.39897E-39 | 0.396915068 |
| IMGA Medtr5g090630.1 | Mtr.41054.1.S1_at   | 147.1979 | 112.472  | 120.7806 | 59.11265 | 86.87877 | 32.04941 | 126.8168 | 18.13279 | 59.34694 | 27.41543 | 0.02368543  | 1.15792E-10 | 0.467973719 |
|                      | Mtr.41121.1.S1_at   | 1034.781 | 1771.956 | 1883.752 | 397.0967 | 969.8388 | 682.4482 | 1563.496 | 461.2802 | 683.1279 | 286.3716 | 0.048392158 | 1.0112E-07  | 0.436923258 |
|                      | Mtr.41140.1.S1_at   | 580.5566 | 508.4682 | 444.892  | 156.8948 | 183.8221 | 133.7971 | 511.3056 | 67.8768  | 158.1713 | 25.03689 | 0.001072445 | 0           | 0.30934792  |
|                      | Mtr.41157.1.S1_at   | 138.6766 | 141.1228 | 99.41755 | 63.26436 | 46.72139 | 65.7674  | 126.4057 | 23.40438 | 58.58438 | 10.3496  | 0.010104132 | 7.40047E-30 | 0.463463263 |
|                      | Mtr.41215.1.S1_at   | 771.8585 | 896.0316 | 567.7617 | 217.2363 | 222.865  | 240.5447 | 745.2173 | 165.7486 | 226.882  | 12.16234 | 0.005684596 | 0           | 0.304450837 |
|                      | Mtr.4126.1.S1_at    | 88.10896 | 130.2327 | 105.018  | 43.80151 | 29.2859  | 49.32274 | 107.7865 | 21.19787 | 40.80338 | 10.34941 | 0.007939431 | 3.63672E-29 | 0.378557298 |
|                      | Mtr.41286.1.S1_at   | 128.5404 | 173.9629 | 875.5267 | 109.1008 | 57.98755 | 221.2285 | 392.6767 | 418.7766 | 129.439  | 83.49932 | 0.345798849 | 4.75018E-08 | 0.329632404 |
| IMGA Medtr4g016510.1 | Mtr.41305.1.S1_at   | 363.5316 | 381.4741 | 339.5285 | 125.8323 | 129.7473 | 140.5307 | 361.5114 | 21.04565 | 132.0368 | 7.612004 | 5.90584E-05 | 0           | 0.365235397 |
|                      | Mtr.41407.1.S1_at   | 665.4701 | 519.2569 | 375.4425 | 288.0426 | 143.6525 | 183.8666 | 520.0565 | 145.0154 | 205.1872 | 74.51879 | 0.028702622 | 2.50662E-13 | 0.394547902 |
| IMGA Medtr2g077690.1 | Mtr.41715.1.S1_at   | 159.0515 | 178.2471 | 153.9596 | 51.15088 | 61.74875 | 75.79329 | 163.7527 | 12.80811 | 62.89764 | 12.36131 | 0.000604427 | 0           | 0.384101276 |
|                      | Mtr.41864.1.S1_at   | 56.75079 | 56.95325 | 35.3296  | 29.06663 | 18.69837 | 20.39445 | 49.67788 | 12.42638 | 22.71982 | 5.561538 | 0.026542581 | 4.63356E-17 | 0.457342784 |
|                      | Mtr.41926.1.S1_at   | 203.641  | 309.8092 | 270.2333 | 57.2051  | 66.26426 | 64.66713 | 261.2278 | 53.65395 | 62.71216 | 4.835652 | 0.003091967 | 0           | 0.240066936 |
|                      | Mtr.42164.1.S1_at   | 1159.839 | 1428.698 | 1245.371 | 521.905  | 896.0789 | 397.3983 | 1277.969 | 137.3623 | 605.1274 | 259.5478 | 0.016558268 | 0           | 0.473507056 |
| IMGA Medtr3g089570.1 | Mtr.42189.1.S1_at   | 345.7912 | 411.793  | 476.4747 | 133.0316 | 145.5509 | 113.5464 | 411.3529 | 65.34289 | 130.7096 | 16.12813 | 0.001949335 | 1.4872E-199 | 0.317755428 |
| IMGA Medtr2g100880.1 | Mtr.42339.1.S1_at   | 482.9786 | 961.3059 | 267.865  | 79.19831 | 115.1113 | 89.28773 | 570.7165 | 354.9486 | 94.53245 | 18.52204 | 0.081093195 | 0           | 0.165638196 |
| IMGA Medtr8g091320.3 | Mtr.42849.1.S1_at   | 446.8542 | 749.8255 | 623.7483 | 38.22419 | 106.3038 | 45.69214 | 606.8093 | 152.1943 | 63.40671 | 37.33716 | 0.003868078 | 3.2602E-140 | 0.104491987 |
| IMGA Medtr7g093140.1 | Mtr.43089.1.S1_at   | 142.3043 | 174.0548 | 142.4171 | 31.30232 | 40.33281 | 40.27768 | 152.9254 | 18.2987  | 37.30427 | 5.197911 | 0.000460426 | 0           | 0.243937644 |
| IMGA Medtr4g015120.1 | Mtr.43288.1.S1_at   | 274.3967 | 255.4158 | 179.7499 | 111.4328 | 65.6524  | 135.5675 | 236.5208 | 50.07264 | 104.2176 | 35.51164 | 0.0202443   | 1.09673E-10 | 0.440627603 |
|                      | Mtr.43345.1.S1_at   | 3755.159 | 3875.948 | 5089.87  | 2179.95  | 1707.449 | 1832.532 | 4240.326 | 738.2014 | 1906.643 | 244.8136 | 0.006528673 | 3.07027E-61 | 0.449645498 |
| IMGA AC225518_3.1    | Mtr.4357.1.S1_at    | 254.2623 | 246.5129 | 317.4671 | 69.39631 | 60.90278 | 71.60543 | 272.7474 | 38.9217  | 67.30151 | 5.650475 | 0.000826868 | 0           | 0.246753964 |
|                      | Mtr.43771.1.S1_at   | 444.5056 | 405.6382 | 226.5399 | 129.1104 | 140.6333 | 136.4282 | 358.8945 | 116.2583 | 135.3907 | 5.831118 | 0.029224046 | 0           | 0.377243555 |
| IMGA Medtr2g062280.1 | Mtr.43826.1.S1_at   | 63.1481  | 68.30734 | 68.21062 | 18.70559 | 22.6694  | 29.65997 | 66.55535 | 2.951161 | 23.67832 | 5.546443 | 0.000293194 | 0           | 0.355768844 |
|                      | Mtr.44100.1.S1_at   | 226.021  | 182.2285 | 109.0774 | 79.19831 | 88.01327 | 50.47974 | 172.4423 | 59.08284 | 72.56377 | 19.62662 | 0.049884816 | 1.20449E-18 | 0.420800335 |
| IMGA Medtr2g086790.1 | Mtr.44119.1.S1_at   | 418.9933 | 416.5831 | 453.0316 | 205.1983 | 174.0316 | 236.9905 | 429.536  | 20.38347 | 205.4068 | 31.47994 | 0.000491618 | 0           | 0.478206278 |
| IMGA Medtr7g058750.1 | Mtr.44423.1.S1_at   | 247.8399 | 213.4663 | 164.3096 | 106.6503 | 99.84505 | 100.1025 | 208.5386 | 41.98262 | 102.1993 | 3.856822 | 0.011979528 | 0           | 0.490073753 |
|                      | Mtr.44458.1.S1_at   | 74.71354 | 55.71145 | 74.5399  | 13.56139 | 17.77094 | 11.61491 | 68.32163 | 10.92108 | 14.31574 | 3.146578 | 0.001188221 | 0           | 0.209534586 |
|                      | Mtr.44509.1.S1_at   | 2467.787 | 3155.83  | 3365.179 | 1003.683 | 1925.895 | 1504.877 | 2996.265 | 469.493  | 1478.152 | 461.6864 | 0.016220367 | 1.23144E-08 | 0.493331409 |
| IMGA CU633465_8.1    | Mtr.44525.1.S1_at   | 96.46003 | 96.31746 | 62.29465 | 44.36502 | 40.37303 | 38.21983 | 85.02405 | 19.68436 | 40.98596 | 3.11811  | 0.018662077 | 3.7287E-132 | 0.482051401 |
| IMGA Medtr6g005480.1 | Mtr.44648.1.S1_at   | 109.116  | 94.44713 | 59.69738 | 45.77344 | 43.11605 | 37.65614 | 87.75352 | 25.38019 | 42.18188 | 4.138493 | 0.037312554 | 4.25711E-81 | 0.480685857 |
| IMGA Medtr4g064530.1 | Mtr.44766.1.S1_at   | 55.4651  | 56.73147 | 66.05993 | 30.87395 | 21.4151  | 23.33277 | 59.41883 | 5.786104 | 25.20727 | 5.000276 | 0.001494553 | 0           | 0.424230367 |
|                      | Mtr.44950.1.S1_at   | 108.7572 | 101.0082 | 144.2615 | 46.88203 | 31.64282 | 47.40487 | 118.009  | 23.06315 | 41.97657 | 8.953112 | 0.005993273 | 5.63783E-49 | 0.355706603 |
|                      | Mtr.45240.1.S1_at   | 54.43334 | 68.86199 | 54.72307 | 22.4422  | 24.55341 | 14.48819 | 59.33947 | 8.248016 | 20.4946  | 5.307734 | 0.002364753 | 8.02579E-37 | 0.345378961 |
| IMGA Medtr4g082230.1 | Mtr.45436.1.S1_at   | 153.9234 | 128.6591 | 98.27061 | 68.87963 | 53.13444 | 63.84237 | 126.951  | 27.86566 | 61.95215 | 8.040986 | 0.017814582 | 1.53833E-44 | 0.488000312 |
| IMGA Medtr3g031040.1 | Mtr.45460.1.S1_at   | 504.7513 | 868.3772 | 795.2918 | 252.8066 | 410.7933 | 409.5196 | 722.8067 | 192.3448 | 357.7065 | 90.84822 | 0.04103081  | 3.38454E-12 | 0.49488539  |
| IMGA Medtr2g099780.1 | Mtr.45681.1.S1_s_at | 75.52508 | 115.996  | 129.0732 | 35.3367  | 57.87494 | 64.03641 | 106.8648 | 27.91747 | 52.41602 | 15.10854 | 0.041106249 | 4.31932E-10 | 0.490489293 |
| IMGA Medtr3g095180.1 | Mtr.45802.1.S1_at   | 454.2753 | 430.7566 | 484.4822 | 141.1674 | 144.365  | 164.2338 | 456.5047 | 26.93209 | 149.922  | 12.49702 | 5.74352E-05 | 0           | 0.328412913 |
| IMGA Medtr8g045300.1 | Mtr.45935.1.S1_at   | 2364.89  | 2640.665 | 3252.382 | 1047.494 | 1213.694 | 1150.023 | 2752.645 | 454.2196 | 1137.07  | 83.85368 | 0.003747434 | 3.6465E-244 | 0.413082774 |
| IMGA Medtr8g087860.1 | Mtr.46049.1.S1_at   | 17.69933 | 17.07397 | 28.72219 | 5.577539 | 6.961278 | 8.918741 | 21.16517 | 6.552043 | 7.152519 | 1.678791 | 0.02299532  | 2.26328E-47 | 0.337938242 |
| IMGA Medtr4g114570.1 | Mtr.46451.1.S1_at   | 64.53165 | 69.68992 | 123.7754 | 33.36835 | 24.78207 | 33.095   | 85.999   | 32.81686 | 30.41514 | 4.880296 | 0.044039924 | 1.26278E-86 | 0.353668531 |
| IMGA Medtr7g073380.1 | Mtr.47266.1.S1_at   | 697.124  | 779.0349 | 682.5316 | 370.1012 | 205.67   | 472.865  | 719.5635 | 52.01797 | 349.5454 | 134.7783 | 0.0113673   | 0           | 0.485774166 |
| IMGA Medtr4g009170.1 | Mtr.47758.1.S1_at   | 148.1793 | 124.4739 | 156.1983 | 72.9685  | 44.81979 | 81.19831 | 142.9505 | 16.4959  | 66.32887 | 19.0765  | 0.006244799 | 8.88178E-16 | 0.463998801 |

|                      |                     |          |          |          |          |          |          |          |          |          |          |             |             |             |
|----------------------|---------------------|----------|----------|----------|----------|----------|----------|----------|----------|----------|----------|-------------|-------------|-------------|
| IMGA Medtr7g080550.1 | Mtr.48575.1.S1_at   | 912.0136 | 1506.314 | 1554.857 | 366.0316 | 834.9435 | 586.5092 | 1324.395 | 357.9566 | 595.8281 | 234.5948 | 0.042030719 | 7.48482E-08 | 0.449886991 |
| IMGA Medtr7g101080.1 | Mtr.48994.1.S1_at   | 2017.48  | 1993.803 | 1956.374 | 710.8311 | 484.1412 | 708.7148 | 1989.219 | 30.80958 | 634.5623 | 130.2728 | 6.22176E-05 | 0           | 0.319000748 |
| IMGA Medtr3g110550.1 | Mtr.49056.1.S1_at   | 49.5454  | 81.64142 | 93.19777 | 22.55227 | 25.95039 | 33.89977 | 74.79486 | 22.61723 | 27.46748 | 5.823885 | 0.024674437 | 5.382E-45   | 0.367237458 |
| IMGA Medtr5g029770.1 | Mtr.49103.1.S1_s_at | 748.6473 | 1243.801 | 1306.199 | 314.4912 | 720.1937 | 467.5711 | 1099.549 | 305.487  | 500.752  | 204.8764 | 0.047844692 | 4.14223E-07 | 0.455415882 |
| IMGA Medtr3g099580.1 | Mtr.49274.1.S1_at   | 504.4296 | 449.6957 | 251.9823 | 153.5474 | 90.18547 | 117.836  | 402.0359 | 132.8006 | 120.523  | 31.76633 | 0.023357121 | 3.57375E-53 | 0.299781663 |
| IMGA Medtr4g072240.1 | Mtr.49768.1.S1_x_at | 671.2477 | 756.9342 | 476.7737 | 193.7849 | 211.8505 | 171.9427 | 634.9852 | 143.5573 | 192.526  | 19.98368 | 0.006139346 | 0           | 0.303197671 |
| IMGA Medtr4g072490.1 | Mtr.49785.1.S1_x_at | 19.97232 | 13.4798  | 14.31565 | 7.637352 | 5.787001 | 6.375997 | 15.92259 | 3.53198  | 6.600117 | 0.945316 | 0.011544737 | 2.07522E-65 | 0.414512713 |
| IMGA Medtr4g072580.1 | Mtr.49791.1.S1_at   | 90.03418 | 85.68029 | 91.69831 | 22.86668 | 7.562889 | 7.570704 | 89.13759 | 3.107581 | 12.66676 | 8.833394 | 0.000145028 | 0           | 0.14210344  |
| IMGA Medtr4g072580.1 | Mtr.49791.1.S1_x_at | 79.21261 | 58.08539 | 82.72051 | 30.15815 | 5.56877  | 9.894154 | 73.3395  | 13.32637 | 15.20702 | 13.12743 | 0.005758533 | 1.71892E-14 | 0.207351074 |
| IMGA Medtr4g072610.1 | Mtr.49793.1.S1_x_at | 95.69446 | 89.83411 | 100.3937 | 20.10334 | 24.774   | 24.10099 | 95.30743 | 5.290443 | 22.99278 | 2.524846 | 2.83718E-05 | 0           | 0.241248505 |
| IMGA Medtr4g072660.1 | Mtr.49795.1.S1_at   | 767.0219 | 621.8174 | 583.2235 | 149.1984 | 148.5132 | 181.3719 | 657.3543 | 96.91548 | 159.6945 | 18.77632 | 0.000947775 | 0           | 0.242935265 |
| IMGA Medtr4g130510.1 | Mtr.50224.1.S1_s_at | 410.0474 | 324.7122 | 353.7747 | 147.1857 | 107.6983 | 165.5141 | 362.8447 | 43.38459 | 140.1327 | 29.54615 | 0.001825768 | 0           | 0.386205694 |
| IMGA Medtr4g079500.1 | Mtr.50393.1.S1_s_at | 159.6983 | 149.4918 | 195.9082 | 83.53165 | 83.8977  | 82.67903 | 168.3661 | 24.39201 | 83.36946 | 0.625313 | 0.003803979 | 0           | 0.495167696 |
| IMGA Medtr8g065810.1 | Mtr.50411.1.S1_at   | 34.45753 | 37.06668 | 18.86448 | 14.11912 | 13.51288 | 14.92674 | 30.12956 | 9.842691 | 14.18625 | 0.709314 | 0.04889417  | 0           | 0.470841413 |
| IMGA Medtr8g013680.1 | Mtr.50501.1.S1_at   | 3055.465 | 2603.02  | 2482.866 | 1186.949 | 1393.731 | 1268.151 | 2713.784 | 301.9419 | 1282.944 | 104.1817 | 0.001487005 | 4.4319E-125 | 0.472750824 |
| IMGA Medtr7g011060.2 | Mtr.50574.1.S1_at   | 799.6627 | 841.4206 | 868.854  | 223.672  | 246.7622 | 201.6543 | 836.6458 | 34.84191 | 224.0295 | 22.55607 | 1.39051E-05 | 0           | 0.267771005 |
| IMGA Medtr4g115460.1 | Mtr.50722.1.S1_at   | 28.38516 | 38.69873 | 43.55266 | 20.95976 | 14.04246 | 19.67229 | 36.87885 | 7.74579  | 18.22483 | 3.678805 | 0.019640294 | 1.5968E-18  | 0.494181164 |
| IMGA Medtr4g064530.1 | Mtr.50799.1.S1_s_at | 97.90086 | 82.34003 | 130.73   | 44.29302 | 17.26634 | 49.32104 | 103.657  | 24.70317 | 36.96013 | 17.23962 | 0.018540184 | 2.0703E-11  | 0.356562009 |
| IMGA Medtr4g116190.1 | Mtr.50874.1.S1_at   | 167.1423 | 136.952  | 104.7587 | 61.07744 | 64.7989  | 60.6167  | 136.2843 | 31.19716 | 62.16435 | 2.29319  | 0.014804173 | 0           | 0.45613726  |
| IMGA Medtr4g059720.1 | Mtr.50904.1.S1_at   | 502.7366 | 366.4527 | 481.1535 | 133.9698 | 104.7287 | 173.7234 | 450.1142 | 73.2523  | 137.474  | 34.63059 | 0.002606322 | 4.09284E-55 | 0.305420186 |
| IMGA Medtr2g010250.1 | Mtr.51059.1.S1_x_at | 396.4541 | 397.2662 | 328.5622 | 162.2744 | 233.842  | 159.5598 | 374.0942 | 39.43395 | 185.2254 | 42.12507 | 0.00477453  | 0           | 0.495130398 |
| IMGA Medtr2g035780.1 | Mtr.51462.1.S1_s_at | 662.7546 | 471.0883 | 443.0399 | 231.0037 | 164.0486 | 224.7701 | 525.6276 | 119.5807 | 206.6074 | 36.98862 | 0.011560621 | 1.84746E-50 | 0.39306812  |
| IMGA Medtr2g081590.1 | Mtr.51510.1.S1_at   | 943.9709 | 1296.662 | 2392.313 | 50.52779 | 48.07612 | 50.91371 | 1544.315 | 755.2634 | 49.83921 | 1.539023 | 0.026601753 | 0           | 0.032272686 |
| IMGA Medtr6g009320.1 | Mtr.51616.1.S1_at   | 67.97149 | 104.2598 | 118.4958 | 31.17606 | 43.36505 | 47.58483 | 96.90902 | 26.05189 | 40.70864 | 8.520814 | 0.023770082 | 3.17245E-30 | 0.420070714 |
| IMGA Medtr3g077410.1 | Mtr.51752.1.S1_at   | 198.8477 | 150.0852 | 105.4869 | 48.90694 | 55.72134 | 82.84282 | 151.4732 | 46.69589 | 62.49036 | 17.95204 | 0.036904885 | 9.06353E-18 | 0.412550522 |
| IMGA Medtr3g088970.1 | Mtr.52006.1.S1_at   | 883.8336 | 731.6428 | 957.5671 | 179.903  | 411.2785 | 238.1347 | 857.6811 | 115.2103 | 276.4388 | 120.3497 | 0.003782964 | 0           | 0.322309472 |
| IMGA Medtr3g088970.1 | Mtr.52006.1.S1_s_at | 1265.878 | 1080.617 | 1415.472 | 249.3037 | 624.8296 | 362.5422 | 1253.989 | 167.7439 | 412.2251 | 192.6298 | 0.00465811  | 0           | 0.328731125 |
| IMGA Medtr4g014070.1 | Mtr.5210.1.S1_at    | 108.4841 | 160.5994 | 169.5316 | 50.09827 | 91.46639 | 77.41178 | 146.205  | 32.97119 | 72.99215 | 21.03522 | 0.031603101 | 1.65604E-09 | 0.499245121 |
| IMGA Medtr4g072600.1 | Mtr.5470.1.S1_at    | 70.94149 | 52.39558 | 45.68347 | 15.06448 | 12.58063 | 16.32209 | 56.34018 | 13.08288 | 14.65574 | 1.903925 | 0.005466257 | 0           | 0.260129383 |
| IMGA Medtr4g072600.1 | Mtr.5470.1.S1_x_at  | 74.14692 | 74.46261 | 80.62    | 17.22189 | 17.69482 | 18.43582 | 76.40985 | 3.649518 | 17.78418 | 0.611879 | 1.04892E-05 | 0           | 0.232747173 |
| IMGA Medtr1g099440.1 | Mtr.5500.1.S1_at    | 74.17072 | 76.00669 | 75.3523  | 29.8327  | 19.22557 | 25.40801 | 75.17657 | 0.930513 | 24.8221  | 5.327784 | 8.64947E-05 | 0           | 0.330183929 |
| IMGA Medtr4g072680.1 | Mtr.5540.1.S1_at    | 540.1569 | 433.3388 | 427.4917 | 70.58743 | 83.64585 | 79.42744 | 466.9958 | 63.4268  | 77.88691 | 6.664122 | 0.00045369  | 0           | 0.16678287  |
| IMGA Medtr5g070330.1 | Mtr.5594.1.S1_at    | 246.7451 | 330.3635 | 71.77926 | 60.523   | 70.80336 | 33.40525 | 216.296  | 131.9538 | 54.91053 | 19.32044 | 0.104119343 | 1.93058E-47 | 0.253867603 |
|                      | Mtr.5719.1.S1_at    | 295.7656 | 252.8464 | 446.7732 | 92.78288 | 78.26999 | 92.53165 | 331.7951 | 101.8602 | 87.8615  | 8.307448 | 0.014444822 | 0           | 0.264806511 |
| IMGA Medtr6g012520.1 | Mtr.6141.1.S1_s_at  | 350.4945 | 329.5653 | 475.4329 | 97.26805 | 95.5197  | 63.48824 | 385.1642 | 78.87227 | 85.42533 | 19.01818 | 0.003062841 | 4.4496E-164 | 0.221789372 |
|                      | Mtr.6179.1.S1_at    | 78.11472 | 84.88977 | 98.65733 | 34.98696 | 43.41517 | 50.20979 | 87.2206  | 10.46778 | 42.87064 | 7.626013 | 0.004049821 | 7.2772E-24  | 0.491519643 |
|                      | Mtr.6371.1.S1_s_at  | 1005.147 | 941.2754 | 1565.658 | 571.3208 | 542.3145 | 528.5399 | 1170.693 | 343.537  | 547.3917 | 21.83769 | 0.034974113 | 0           | 0.467579086 |
| IMGA Medtr1g110390.1 | Mtr.6507.1.S1_at    | 56.6705  | 54.35721 | 39.38619 | 17.4271  | 12.96119 | 13.23916 | 50.13797 | 9.382875 | 14.54248 | 2.502018 | 0.003152971 | 4.5666E-134 | 0.2900493   |
| IMGA Medtr5g010150.1 | Mtr.6632.1.S1_at    | 1595.315 | 1941.987 | 1738.683 | 656.9583 | 997.0287 | 795.2666 | 1758.662 | 174.1975 | 816.4178 | 171.019  | 0.002603046 | 0           | 0.46422677  |
|                      | Mtr.6694.1.S1_at    | 150.1754 | 191.0387 | 82.33801 | 49.01993 | 63.068   | 28.36176 | 141.184  | 54.90532 | 46.81657 | 17.45772 | 0.047011489 | 7.78135E-21 | 0.331599544 |
|                      | Mtr.6710.1.S1_at    | 27.73587 | 40.34551 | 26.2383  | 13.20086 | 21.34299 | 11.38983 | 31.43989 | 7.748756 | 15.31122 | 5.301564 | 0.040923892 | 1.36929E-07 | 0.486999802 |
| IMGA Medtr4g072890.1 | Mtr.697.1.S1_at     | 1050.995 | 980.904  | 817.527  | 346.7758 | 345.5226 | 393.3232 | 949.8088 | 119.8    | 361.8739 | 27.24315 | 0.001156654 | 0           | 0.380996573 |
| IMGA Medtr4g072890.1 | Mtr.697.1.S1_s_at   | 167.4051 | 205.964  | 157.1498 | 58.77144 | 57.97373 | 59.86009 | 176.8396 | 25.73836 | 58.86842 | 0.946916 | 0.001366618 | 0           | 0.332891598 |
| IMGA Medtr4g072860.1 | Mtr.699.1.S1_at     | 508.4879 | 498.4589 | 423.8387 | 158.962  | 168.6171 | 162.6983 | 476.9285 | 46.24975 | 163.4258 | 4.868492 | 0.000307616 | 0           | 0.342663038 |
| IMGA Medtr4g072850.1 | Mtr.701.1.S1_x_at   | 379.6703 | 434.865  | 424.6513 | 133.6291 | 176.6745 | 183.815  | 413.0622 | 29.36568 | 164.7062 | 27.14935 | 0.000423565 | 0           | 0.398744232 |
| IMGA Medtr4g072830.1 | Mtr.702.1.S1_at     | 147.7947 | 151.8748 | 185.7103 | 25.3234  | 20.65025 | 30.37514 | 161.7933 | 20.81301 | 25.4496  | 4.863672 | 0.000381538 | 0           | 0.157297026 |
|                      | Mtr.703.1.S1_at     | 41.5128  | 43.8058  | 51.69831 | 9.508369 | 6.035124 | 9.010658 | 45.6723  | 5.343132 | 8.184717 | 1.878162 | 0.000330385 | 0           | 0.179205259 |
| IMGA Medtr4g072720.1 | Mtr.705.1.S1_x_at   | 241.2415 | 184.2006 | 144.0015 | 38.43209 | 42.19681 | 70.66593 | 189.8145 | 48.86249 | 50.43161 | 17.62425 | 0.009678198 | 1.0425E-42  | 0.265688881 |
| IMGA Medtr4g107840.1 | Mtr.7573.1.S1_at    | 115.7413 | 135.2914 | 114.1391 | 46.33737 | 39.54899 | 39.80659 | 121.724  | 11.77704 | 41.89765 | 3.847066 | 0.000366975 | 0           | 0.344202143 |
| IMGA Medtr7g105070.1 | Mtr.762.1.S1_at     | 269.1189 | 199.6245 | 114.8808 | 84.37892 | 49.59725 | 65.11372 | 194.5414 | 77.24459 | 66.3633  | 17.42447 | 0.048628693 | 3.484E-37   | 0.341126867 |

|                       |                  |          |          |          |          |          |          |          |          |          |          |             |             |             |
|-----------------------|------------------|----------|----------|----------|----------|----------|----------|----------|----------|----------|----------|-------------|-------------|-------------|
| IMGAl Medtr4g097670.1 | Mtr.8618.1.S1_at | 1390.222 | 1729.581 | 2128.948 | 640.9047 | 1036.148 | 724.4009 | 1749.584 | 369.7692 | 800.4845 | 208.3166 | 0.017942534 | 2.99064E-15 | 0.457528517 |
|                       | Mtr.8650.1.S1_at | 3003.843 | 3108.241 | 2781.204 | 1591.599 | 2150.904 | 682.5316 | 2964.43  | 167.0429 | 1475.012 | 741.0965 | 0.027383269 | 0           | 0.497570194 |
|                       | Mtr.8680.1.S1_at | 4915.207 | 4048.07  | 4242.868 | 1616.978 | 2232.791 | 1314.087 | 4402.048 | 454.9564 | 1721.285 | 468.1498 | 0.002064583 | 0           | 0.391019148 |
|                       | Mtr.8859.1.S1_at | 1685.809 | 1738.144 | 1243.306 | 606.1926 | 737.3251 | 560.6965 | 1555.753 | 271.8496 | 634.738  | 91.70904 | 0.005122522 | 9.06093E-68 | 0.407994082 |
|                       | Mtr.8959.1.S1_at | 316.309  | 347.499  | 542.4158 | 100.2213 | 84.32751 | 76.12275 | 402.0746 | 122.5354 | 86.89052 | 12.25201 | 0.011395027 | 0           | 0.216105452 |
|                       | Mtr.9169.1.S1_at | 207.1983 | 212.8385 | 67.87895 | 48.84117 | 50.80593 | 50.34881 | 162.6386 | 82.11271 | 49.99864 | 1.028121 | 0.076337857 | 0           | 0.307421711 |
|                       | Mtr.9315.1.S1_at | 101.9127 | 90.54499 | 111.7053 | 55.77458 | 40.74052 | 49.30008 | 101.3877 | 10.5899  | 48.60506 | 7.541088 | 0.00215476  | 0           | 0.47939814  |
|                       | Mtr.9328.1.S1_at | 125.4456 | 106.9691 | 154.6464 | 73.33568 | 34.5339  | 62.77285 | 129.0203 | 24.03883 | 56.88081 | 20.0607  | 0.016254694 | 4.70737E-10 | 0.440866993 |
|                       | Mtr.9594.1.S1_at | 380.6852 | 336.2333 | 426.7921 | 213.349  | 141.9931 | 165.9695 | 381.2369 | 45.28194 | 173.7705 | 36.31194 | 0.003460356 | 4.33345E-23 | 0.455807225 |

**Supplementary Table S2.** Total up- or down-regulated genes analysed by MapMan. Elements (genes) in different subgroups but under the same bin numbers are grouped together. 312 elements from 20 groups are down-regulated and 603 elements from 22 groups are up-regulated.

### Down-regulated genes

| bin      | name                                                             | elements   | p-value  |
|----------|------------------------------------------------------------------|------------|----------|
| 35       | not assigned                                                     | 139        | 1.93E-08 |
| 35       | hormone metabolism                                               | 45         | 0.194    |
| 11       | lipid metabolism                                                 | 9          | 0.409    |
| 28       | DNA                                                              | 5          | 0.488    |
| 15       | metal handling                                                   | 2          | 0.488    |
| 21       | redox.regulation                                                 | 2          | 0.488    |
| 27       | RNA                                                              | 7          | 0.488    |
| 31       | cell                                                             | 6          | 0.488    |
| 20       | stress                                                           | 5          | 0.488    |
| 16       | secondary metabolism                                             | 17         | 0.488    |
| 29       | protein                                                          | 2          | 0.622    |
| 34       | transport                                                        | 15         | 0.638    |
| 26       | misc                                                             | 18         | 0.721    |
| 33       | development                                                      | 4          | 0.721    |
| 30       | signalling                                                       | 12         | 0.721    |
| 10       | cell wall                                                        | 15         | 0.721    |
| 23       | nucleotide metabolism                                            | 3          | 0.721    |
| 5        | fermentation                                                     | 1          | 0.782    |
| 3        | minor CHO metabolism                                             | 2          | 0.911    |
| 13       | amino acid metabolism                                            | 3          | 0.951    |
|          |                                                                  | <b>312</b> |          |
| 17.2     | hormone metabolism.auxin                                         | 41         | 1.29E-08 |
| 17.2.3   | hormone metabolism.auxin.induced-regulated-responsive-activated  | 41         | 1.29E-08 |
| 11.3     | lipid metabolism.Phospholipid synthesis                          | 4          | 0.194    |
| 35.2     | not assigned.unknown                                             | 139        | 0.194    |
| 30.10    | signalling.phosphorelay                                          | 3          | 0.303    |
| 30.2     | signalling.receptor kinases                                      | 3          | 0.409    |
| 27.3.35  | RNA.regulation of transcription.bZIP transcription factor family | 2          | 0.488    |
| 34.19    | transport.Major Intrinsic Proteins                               | 5          | 0.488    |
| 20.2.3   | stress.abiotic.drought/salt                                      | 1          | 0.488    |
| 30.2.3   | signalling.receptor kinases.leucine rich repeat III              | 1          | 0.488    |
| 26.28    | misc.GDSL-motif lipase                                           | 4          | 0.488    |
| 26.10    | misc.cytochrome P450                                             | 3          | 0.488    |
| 3.4      | minor CHO metabolism.myo-inositol                                | 1          | 0.488    |
| 3.4.3    | minor CHO metabolism.myo-inositol.InsP Synthases                 | 1          | 0.488    |
| 26.2     | misc.UDP glucosyl and glucoronyl transferases                    | 4          | 0.488    |
| 34.10    | transport.nucleotides                                            | 1          | 0.488    |
| 16.10    | secondary metabolism.simple phenols                              | 6          | 0.488    |
| 34.16    | transport.ABC transporters and multidrug resistance systems      | 1          | 0.488    |
| 21.2     | redox.ascorbate and glutathione                                  | 2          | 0.488    |
| 13.2     | amino acid metabolism.degradation                                | 1          | 0.488    |
| 13.2.3   | amino acid metabolism.degradation.aspartate family               | 1          | 0.488    |
| 13.2.3.5 | amino acid metabolism.degradation.aspartate family.lysine        | 1          | 0.488    |

|             |                                                                         |   |       |
|-------------|-------------------------------------------------------------------------|---|-------|
| 20.2        | stress.abiotic                                                          | 3 | 0.488 |
| 30.2.17     | signalling.receptor kinases.DUF 26                                      | 2 | 0.488 |
| 15.1        | metal handling.acquisition                                              | 1 | 0.488 |
| 16.4        | secondary metabolism.N misc                                             | 1 | 0.488 |
| 16.4.1      | secondary metabolism.N misc.alkaloid-like                               | 1 | 0.488 |
| 34.13       | transport.peptides and oligopeptides                                    | 1 | 0.488 |
| 16.2.1      | secondary metabolism.phenylpropanoids.lignin biosynthesis               | 1 | 0.488 |
| 16.2.1.9    | secondary metabolism.phenylpropanoids.lignin biosynthesis.COMT          | 1 | 0.488 |
| 27.3        | RNA.regulation of transcription                                         | 7 | 0.488 |
| 34.19.2     | transport.Major Intrinsic Proteins.TIP                                  | 2 | 0.488 |
| 28.1.3      | DNA.synthesis/chromatin structure.histone                               | 2 | 0.488 |
| 34.9        | transport.metabolite transporters at the mitochondrial membrane         | 1 | 0.488 |
| 3.5         | minor CHO metabolism.others                                             | 1 | 0.488 |
| 16.8.2      | secondary metabolism.flavonoids.chalcones                               | 1 | 0.488 |
| 17.1        | hormone metabolism.abscisic acid                                        | 1 | 0.488 |
| 17.1.1      | hormone metabolism.abscisic acid.synthesis-degradation                  | 1 | 0.488 |
| 17.1.1.1    | hormone metabolism.abscisic acid.synthesis-degradation.synthesis        | 1 | 0.488 |
| 17.1.1.1.1  | hormone.ABA.synthesis-degradation.synthesis.zeaxanthin epoxidase        | 1 | 0.488 |
| 34.8        | transport.metabolite transporters at the envelope membrane              | 1 | 0.488 |
| 31.1        | cell.organisation                                                       | 6 | 0.488 |
| 34.19.1     | transport.Major Intrinsic Proteins.PIP                                  | 3 | 0.488 |
| 16.8        | secondary metabolism.flavonoids                                         | 5 | 0.488 |
| 28.1        | DNA.synthesis/chromatin structure                                       | 4 | 0.488 |
| 29.4        | protein.postranslational modification                                   | 1 | 0.488 |
| 11.9        | lipid metabolism.lipid degradation                                      | 1 | 0.488 |
| 11.9.3      | lipid metabolism.lipid degradation.lysophospholipases                   | 1 | 0.488 |
| 11.9.3.3    | lipid.lipid degradation.lysophospholipases.glycerophosphodiesterase     | 1 | 0.488 |
| 17.5        | hormone metabolism.ethylene                                             | 3 | 0.488 |
| 17.5.1      | hormone metabolism.ethylene.synthesis-degradation                       | 3 | 0.488 |
| 34.21       | transport.calcium                                                       | 1 | 0.522 |
| 28.2        | DNA.repair                                                              | 1 | 0.523 |
| 27.3.11     | RNA.regulation of transcription.C2H2 zinc finger family                 | 1 | 0.543 |
| 23.2        | nucleotide metabolism.degradation                                       | 1 | 0.572 |
| 10.5        | cell wall.cell wall proteins                                            | 2 | 0.572 |
| 10.5.1      | cell wall.cell wall proteins.AGPs                                       | 2 | 0.572 |
| 30.3        | signalling.calcium                                                      | 3 | 0.615 |
| 16.2        | secondary metabolism.phenylpropanoids                                   | 3 | 0.622 |
| 13.1        | amino acid metabolism.synthesis                                         | 2 | 0.622 |
| 13.1.2      | amino acid metabolism.synthesis.glutamate family                        | 2 | 0.622 |
| 13.1.2.3    | amino acid metabolism.synthesis.glutamate family.arginine               | 2 | 0.622 |
| 13.1.2.3.22 | amino acid.synthesis.glutamate family.arginine.arginosuccinate synthase | 2 | 0.622 |
| 30.5        | signalling.G-proteins                                                   | 1 | 0.622 |
| 16.1        | secondary metabolism.isoprenoids                                        | 1 | 0.622 |
| 16.1.5      | secondary metabolism.isoprenoids.terpenoids                             | 1 | 0.622 |
| 16.7        | secondary metabolism.wax                                                | 1 | 0.646 |
| 11.1        | lipid metabolism.FA synthesis and FA elongation                         | 2 | 0.668 |
| 11.1.8      | lipid metabolism.FA synthesis and FA elongation.acyl coa ligase         | 2 | 0.668 |
| 15.2        | metal handling.binding, chelation and storage                           | 1 | 0.668 |
| 16.8.3      | secondary metabolism.flavonoids.dihydroflavonols                        | 3 | 0.668 |
| 11.10       | lipid metabolism.glycolipid synthesis                                   | 1 | 0.668 |

|             |                                                                        |   |       |
|-------------|------------------------------------------------------------------------|---|-------|
| 11.10.1     | lipid metabolism.glycolipid synthesis.MGDG synthase                    | 1 | 0.668 |
| 33.99       | development.unspecified                                                | 4 | 0.721 |
| 20.2.99     | stress.abiotic.unspecified                                             | 2 | 0.721 |
| 10.8        | cell wall.pectin*esterases                                             | 1 | 0.721 |
| 10.8.2      | cell wall.pectin*esterases.acetyl esterase                             | 1 | 0.721 |
| 30.2.24     | signalling.receptor kinases.S-locus glycoprotein like                  | 1 | 0.728 |
| 5.10        | fermentation.aldehyde dehydrogenase                                    | 1 | 0.782 |
| 27.3.6      | RNA.regulation of transcription.bHLH,Basic Helix-Loop-Helix family     | 2 | 0.786 |
| 27.3.24     | RNA.regulation of transcription.MADS box transcription factor family   | 1 | 0.786 |
| 34.2        | transporter.sugars                                                     | 1 | 0.818 |
| 11.8        | lipid metabolism."exotics" (steroids, squalene etc)                    | 1 | 0.83  |
| 26.11       | misc.alcohol dehydrogenases                                            | 2 | 0.843 |
| 27.3.3      | RNA.regulation. AP2/Ethylene-responsive element binding protein family | 1 | 0.843 |
| 26.19       | misc.plastocyanin-like                                                 | 3 | 0.86  |
| 34.99       | transport.misc                                                         | 2 | 0.899 |
| 26.4        | misc.beta 1,3 glucan hydrolases                                        | 1 | 0.908 |
| 10.7        | cell wall.modification                                                 | 8 | 0.911 |
| 26.22       | misc.short chain dehydrogenase/reductase (SDR)                         | 1 | 0.913 |
| 16.8.5      | secondary metabolism.flavonoids.isoflavonols                           | 1 | 0.936 |
| 10.2        | cell wall.cellulose synthesis                                          | 4 | 0.936 |
| 10.2.1      | cell wall.cellulose synthesis.cellulose synthase                       | 4 | 0.936 |
| 34.7        | transport.phosphate                                                    | 1 | 0.958 |
| 20.1        | stress.biotic                                                          | 2 | 0.995 |
| 30.11       | signalling.light                                                       | 2 | 0.995 |
| 23.1        | nucleotide metabolism.synthesis                                        | 2 | 0.995 |
| 23.1.1      | nucleotide metabolism.synthesis.pyrimidine                             | 2 | 0.995 |
| 23.1.1.10   | nucleotide metabolism.synthesis.pyrimidine.CTP synthetase              | 2 | 0.995 |
| 29.5        | protein.degradation                                                    | 1 | 0.995 |
| 29.5.11     | protein.degradation.ubiquitin                                          | 1 | 0.995 |
| 29.5.11.4   | protein.degradation.ubiquitin.E3                                       | 1 | 0.995 |
| 29.5.11.4.2 | protein.degradation.ubiquitin.E3.RING                                  | 1 | 0.995 |

### Up-regulated genes

|    |                       |     |         |
|----|-----------------------|-----|---------|
| 13 | amino acid metabolism | 7   | 0.00429 |
| 3  | minor CHO metabolism  | 6   | 0.0182  |
| 26 | misc                  | 60  | 0.0658  |
| 2  | major CHO metabolism  | 3   | 0.126   |
| 29 | protein               | 14  | 0.142   |
| 5  | fermentation          | 3   | 0.175   |
| 30 | signalling            | 25  | 0.187   |
| 20 | stress                | 33  | 0.201   |
| 17 | hormone metabolism    | 22  | 0.202   |
| 33 | development           | 16  | 0.222   |
| 27 | RNA                   | 33  | 0.232   |
| 35 | not assigned          | 307 | 0.375   |
| 31 | cell                  | 4   | 0.394   |
| 23 | nucleotide metabolism | 7   | 0.559   |
| 15 | metal handling        | 1   | 0.584   |
| 21 | redox.regulation      | 2   | 0.604   |
| 10 | cell wall             | 12  | 0.643   |

|          |                                                                        |     |         |
|----------|------------------------------------------------------------------------|-----|---------|
| 34       | transport                                                              | 17  | 0.663   |
| 6        | gluconeogenesis/ glyoxylate cycle                                      | 5   | 0.683   |
| 16       | secondary metabolism                                                   | 21  | 0.855   |
| 28       | DNA                                                                    | 1   | 0.925   |
| 11       | lipid metabolism                                                       | 4   | 0.951   |
|          |                                                                        | 603 |         |
| 13.2     | amino acid metabolism.degradation                                      | 5   | 0.00133 |
| 3.5      | minor CHO metabolism.others                                            | 4   | 0.00317 |
| 26.12    | misc.peroxidases                                                       | 16  | 0.00996 |
| 13.2.3   | amino acid metabolism.degradation.aspartate family                     | 3   | 0.0141  |
| 13.2.3.5 | amino acid metabolism.degradation.aspartate family.lysine              | 3   | 0.0141  |
| 10.2     | cell wall.cellulose synthesis                                          | 3   | 0.0258  |
| 10.2.1   | cell wall.cellulose synthesis.cellulose synthase                       | 3   | 0.0258  |
| 34.3     | transport.amino acids                                                  | 2   | 0.0564  |
| 2.2      | major CHO metabolism.degradation                                       | 2   | 0.0564  |
| 2.2.2    | major CHO metabolism.degradation.starch                                | 2   | 0.0564  |
| 2.2.2.1  | major CHO metabolism.degradation.starch.starch cleavage                | 2   | 0.0564  |
| 6.2      | gluconeogenesis/ glyoxylate cycle.malate synthase                      | 2   | 0.0685  |
| 26.4     | misc.beta 1,3 glucan hydrolases                                        | 3   | 0.0711  |
| 27.3.67  | RNA.regulation of transcription.putative transcription regulator       | 5   | 0.0731  |
| 17.7.1.2 | hormone metabolism.jasmonate.synthesis-degradation.lipoxygenase        | 1   | 0.0848  |
| 17.4     | hormone metabolism.cytokinin                                           | 1   | 0.104   |
| 17.4.2   | hormone metabolism.cytokinin.signal transduction                       | 1   | 0.104   |
| 23.4     | nucleotide metabolism.phosphotransfer and pyrophosphatases             | 1   | 0.106   |
| 23.4.99  | nucleotide metabolism.phosphotransfer and pyrophosphatases.misc        | 1   | 0.106   |
| 27.3.3   | RNA.regulation. AP2/Ethylene-responsive element binding protein family | 3   | 0.116   |
| 11.1     | lipid metabolism.FA synthesis and FA elongation                        | 1   | 0.117   |
| 11.1.10  | lipid.FA synthesis and FA elongation.beta ketoacyl CoA synthase        | 1   | 0.117   |
| 30.1     | signalling.in sugar and nutrient physiology                            | 2   | 0.123   |
| 20.2.99  | stress.abiotic.unspecified                                             | 9   | 0.129   |
| 27.3.6   | RNA.regulation of transcription.bHLH,Basic Helix-Loop-Helix family     | 5   | 0.131   |
| 5.10     | fermentation.aldehyde dehydrogenase                                    | 1   | 0.137   |
| 33.99    | development.unspecified                                                | 11  | 0.142   |
| 13.2.4   | amino acid metabolism.degradation.branched chain group                 | 1   | 0.145   |
| 13.2.4.3 | amino acid metabolism.degradation.branched-chain group.valine          | 1   | 0.145   |
| 13.2.2   | amino acid metabolism.degradation.glutamate family                     | 1   | 0.147   |
| 13.2.2.3 | amino acid metabolism.degradation.glutamate family.arginine            | 1   | 0.147   |
| 17.6.3   | hormone metabolism.gibberelin.induced-regulated-responsive-activated   | 2   | 0.148   |
| 17.5.1   | hormone metabolism.ethylene.synthesis-degradation                      | 6   | 0.149   |
| 20.2     | stress.abiotic                                                         | 13  | 0.159   |
| 30.3     | signalling.calcium                                                     | 8   | 0.159   |
| 16.10    | secondary metabolism.simple phenols                                    | 1   | 0.161   |
| 34.13    | transport.peptides and oligopeptides                                   | 5   | 0.161   |
| 26.13    | misc.acid and other phosphatases                                       | 3   | 0.164   |
| 17.5     | hormone metabolism.ethylene                                            | 10  | 0.165   |
| 16.2.1.6 | secondary metabolism.phenylpropanoids.lignin biosynthesis.CCoAOMT      | 1   | 0.165   |
| 29.4     | protein.postranslational modification                                  | 6   | 0.181   |
| 30.10    | signalling.phosphorelay                                                | 1   | 0.188   |
| 16.2.1.1 | secondary metabolism.phenylpropanoids.lignin biosynthesis.PAL          | 1   | 0.188   |
| 29.5.3   | protein.degradation.cysteine protease                                  | 1   | 0.202   |



|             |                                                                          |     |       |
|-------------|--------------------------------------------------------------------------|-----|-------|
| 30.2.11     | signalling.receptor kinases.leucine rich repeat XI                       | 5   | 0.212 |
| 16.8.4      | secondary metabolism.flavonoids.flavonols                                | 3   | 0.212 |
| 17.6.1      | hormone metabolism.gibberelin.synthesis-degradation                      | 3   | 0.212 |
| 27.3        | RNA.regulation of transcription                                          | 33  | 0.231 |
| 31.1        | cell.organisation                                                        | 2   | 0.235 |
| 30.2.2      | signalling.receptor kinases.leucine rich repeat II                       | 5   | 0.258 |
| 30.2.3      | signalling.receptor kinases.leucine rich repeat III                      | 5   | 0.258 |
| 34.6        | transport.sulphate                                                       | 1   | 0.259 |
| 29.5.11     | protein.degradation.ubiquitin                                            | 3   | 0.271 |
| 29.5.11.4   | protein.degradation.ubiquitin.E3                                         | 3   | 0.271 |
| 29.5.11.4.2 | protein.degradation.ubiquitin.E3.RING                                    | 3   | 0.271 |
| 26.16       | misc.myrosinases-lectin-jacalin                                          | 1   | 0.271 |
| 5.3         | fermentation.ADH                                                         | 1   | 0.278 |
| 11.8        | lipid metabolism."exotics" (steroids, squalene etc)                      | 1   | 0.281 |
| 17.7.1.5    | hormone.jasmonate.synthesis-degradation.12-Oxo-PDA-reductase             | 3   | 0.309 |
| 27.3.37     | RNA.regulation of transcription.AS2,lateral organ ooundaries gene family | 2   | 0.324 |
| 29.5.1      | protein.degradation.subtilases                                           | 1   | 0.328 |
| 6.4         | gluconeogenese/ glyoxylate cycle.PEPCK                                   | 3   | 0.335 |
| 26.21       | misc.lipid transfer protein (LTP) family protein                         | 6   | 0.348 |
| 21.1        | redox.thioredoxin                                                        | 1   | 0.348 |
| 16.2.1      | secondary metabolism.phenylpropanoids.lignin biosynthesis                | 4   | 0.353 |
| 26.24       | misc.GCN5-related N-acetyltransferase                                    | 2   | 0.353 |
| 26.3        | misc.gluco-, galacto- and mannosidases                                   | 5   | 0.363 |
| 35.2        | not assigned.unknown                                                     | 307 | 0.375 |
| 16.8.3      | secondary metabolism.flavonoids.dihydroflavonols                         | 1   | 0.385 |
| 20.2.4      | stress.abiotic.touch/wounding                                            | 1   | 0.425 |
| 29.5        | protein.degradation                                                      | 5   | 0.471 |
| 27.3.5      | RNA.regulation of transcription.ARR                                      | 6   | 0.488 |
| 27.3.25     | RNA.regulation of transcription.MYB domain transcription factor family   | 3   | 0.496 |
| 16.8.2      | secondary metabolism.flavonoids.chalcones                                | 5   | 0.515 |
| 26.2        | misc.UDP glucosyl and glucuronyl transferases                            | 4   | 0.539 |
| 16.2.1.9    | secondary metabolism.phenylpropanoids.lignin biosynthesis.COMT           | 2   | 0.547 |
| 20.1.7      | stress.biotic.PR-proteins                                                | 6   | 0.552 |
| 26.9        | misc.glutathione S transferases                                          | 8   | 0.559 |
| 34.7        | transport.phosphate                                                      | 1   | 0.56  |
| 15.2        | metal handling.binding, chelation and storage                            | 1   | 0.584 |
| 27.3.32     | RNA.regulation of transcription.WRKY domain transcription factor family  | 4   | 0.585 |
| 27.3.12     | RNA.regulation of transcription.C3H zinc finger family                   | 1   | 0.604 |
| 16.8.5      | secondary metabolism.flavonoids.isoflavonols                             | 4   | 0.628 |
| 20.1        | stress.biotic                                                            | 20  | 0.63  |
| 20.1.1      | stress.biotic.respiratory burst                                          | 2   | 0.635 |
| 27.3.7      | RNA.regulation of transcription.C2C2(Zn)CO-like, constans-like ZF family | 2   | 0.635 |
| 10.7        | cell wall.modification                                                   | 4   | 0.636 |
| 10.6        | cell wall.degradation                                                    | 3   | 0.639 |
| 10.6.3      | cell wall.degradation.pectate lyases and polygalacturonases              | 3   | 0.639 |
| 26.1        | misc.misc2                                                               | 1   | 0.649 |
| 11.9        | lipid metabolism.lipid degradation                                       | 2   | 0.665 |
| 11.9.4      | lipid metabolism.lipid degradation.beta-oxidation                        | 2   | 0.665 |
| 11.9.4.5    | lipid metabolism.lipid degradation.beta-oxidation.acyl-CoA thioesterase  | 2   | 0.665 |
| 16.2        | secondary metabolism.phenylpropanoids                                    | 7   | 0.677 |

|              |                                                                                 |    |       |
|--------------|---------------------------------------------------------------------------------|----|-------|
| 17.5.3       | hormone metabolism.ethylene.induced-regulated-responsive-activated              | 2  | 0.695 |
| 10.8         | cell wall.pectin*esterases                                                      | 2  | 0.716 |
| 10.8.1       | cell wall.pectin*esterases.PME                                                  | 2  | 0.716 |
| 29.2         | protein.synthesis                                                               | 3  | 0.743 |
| 26.28        | misc.GDSL-motif lipase                                                          | 1  | 0.744 |
| 16.8         | secondary metabolism.flavonoids                                                 | 13 | 0.751 |
| 29.2.3       | protein.synthesis.initiation                                                    | 2  | 0.776 |
| 30.2         | signalling.receptor kinases                                                     | 14 | 0.789 |
| 13.1         | amino acid metabolism.synthesis                                                 | 2  | 0.795 |
| 13.1.1       | amino acid metabolism.synthesis.central amino acid metabolism                   | 2  | 0.795 |
| 13.1.1.3     | amino acid metabolism.synthesis.central amino acid metabolism.alanine           | 2  | 0.795 |
| 13.1.1.3.11  | Aa.synthesis.central Aa metabolism.Ala.Ala-glyoxylate aminotransferase          | 2  | 0.795 |
| 5.2          | fermentation.PDC                                                                | 1  | 0.824 |
| 27.3.23      | RNA.regulation of transcription.HSF,Heat-shock transcription factor family      | 1  | 0.829 |
| 34.99        | transport.misc                                                                  | 2  | 0.83  |
| 21.2         | redox.ascorbate and glutathione                                                 | 1  | 0.838 |
| 21.2.1       | redox.ascorbate and glutathione.ascorbate                                       | 1  | 0.838 |
| 17.5.2       | hormone metabolism.ethylene.signal transduction                                 | 2  | 0.843 |
| 20.2.1       | stress.abiotic.heat                                                             | 3  | 0.863 |
| 29.2.1       | protein.synthesis.ribosomal protein                                             | 1  | 0.871 |
| 29.2.1.2     | protein.synthesis.ribosomal protein.eukaryotic                                  | 1  | 0.871 |
| 29.2.1.2.2   | protein.synthesis.ribosomal protein.eukaryotic.60S subunit                      | 1  | 0.871 |
| 29.2.1.2.2.1 | protein.synthesis.ribosomal protein.eukaryotic.60S subunit.L10                  | 1  | 0.871 |
| 34.2         | transporter.sugars                                                              | 1  | 0.875 |
| 30.2.99      | signalling.receptor kinases.misc                                                | 2  | 0.882 |
| 27.3.64      | RNA.regulation of transcription.PHOR1                                           | 1  | 0.888 |
| 17.2         | hormone metabolism.auxin                                                        | 2  | 0.898 |
| 17.2.3       | hormone metabolism.auxin.induced-regulated-responsive-activated                 | 2  | 0.898 |
| 26.10        | misc.cytochrome P450                                                            | 9  | 0.905 |
| 34.16        | transport.ABC transporters and multidrug resistance systems                     | 2  | 0.921 |
| 28.1         | DNA.synthesis/chromatin structure                                               | 1  | 0.925 |
| 3.4          | minor CHO metabolism.myo-inositol                                               | 2  | 0.927 |
| 3.4.4        | minor CHO metabolism.myo-inositol.myo inositol oxygenases                       | 2  | 0.927 |
| 30.2.25      | signalling.receptor kinases.wall associated kinase                              | 1  | 0.939 |
| 2.1          | major CHO metabolism.synthesis                                                  | 1  | 0.958 |
| 2.1.1        | major CHO metabolism.synthesis.sucrose                                          | 1  | 0.958 |
| 2.1.1.3      | major CHO metabolism.synthesis.sucrose.FBPase                                   | 1  | 0.958 |
| 34.12        | transport.metal                                                                 | 3  | 0.959 |
| 17.6         | hormone metabolism.gibberelin                                                   | 5  | 0.96  |
| 26.18        | misc.invertase/pectin methylesterase inhibitor family protein                   | 1  | 0.972 |
| 23.2         | nucleotide metabolism.degradation                                               | 6  | 0.975 |
| 17.7         | hormone metabolism.jasmonate                                                    | 4  | 0.986 |
| 17.7.1       | hormone metabolism.jasmonate.synthesis-degradation                              | 4  | 0.986 |
| 31.4         | cell.vesicle transport                                                          | 2  | 0.986 |
| 29.4.1       | protein.postranslational modification.kinase                                    | 3  | 0.991 |
| 29.4.1.57    | protein.postranslation modification.kinase.receptor like cytoplasmic kinase VII | 3  | 0.991 |
| 33.1         | development.storage proteins                                                    | 5  | 0.997 |
| 30.2.17      | signalling.receptor kinases.DUF 26                                              | 2  | 1     |
| 30.2.24      | signalling.receptor kinases.S-locus glycoprotein like                           | 2  | 1     |

**Supplementary Table S3.** Fold changes in expression of genes related to BR metabolism and signaling in microarray analysis of *mtbri1* mutants. Red font indicates down-regulation and green font indicates up-regulation.

| <i>Gene</i>     | <b>Probe Sets</b>   | <b>Fold Change</b> | <b>P value</b> |
|-----------------|---------------------|--------------------|----------------|
| <i>MtBSK1</i>   | Mtr.37962.1.S1_at   | 1.007332463        | 0.881517439    |
| <i>MtCDG1</i>   | Mtr.22348.1.S1_at   | 0.920531091        | 0.189735812    |
| <i>MtPP2A</i>   | Mtr.12546.1.S1_at   | 0.912187001        | 1.44E-05       |
| <i>MtBIN2</i>   | Mtr.8603.1.S1_at    | 1.034859534        | 0.149000518    |
| <i>MtBSU1</i>   | Mtr.38507.1.S1_at   | 1.156552255        | 0.038567326    |
| <i>MtBZR1</i>   | Mtr.9644.1.S1_at    | 0.756033991        | 3.42E-103      |
|                 | Msa.1199.1.S1_at    | 0.748788352        | 7.53E-09       |
|                 | Mtr.4853.1.S1_at    | 0.737510568        | 1.02E-20       |
| <i>MtBZR2</i>   | Mtr.12430.1.S1_s_at | 1.522488479        | 9.53E-17       |
| <i>MtCPD</i>    | Mtr.41645.1.S1_at   | 1.293997           | 1.20E-07       |
| <i>MtDWF4</i>   | Mtr.38274.1.S1_at;  | 5.652685794        | 0.000269705    |
| <i>MtDET2</i>   | Mtr.32396.1.S1_at   | 0.883043407        | 0.059397682    |
| <i>MtDET2-1</i> | Mtr.38769.1.S1_at   | 0.589623117        | 3.58E-12       |
| <i>MtBAS1</i>   | Mtr.1260.1.S1_at    | 0.364872128        | 8.09E-05       |

**Supplementary Table S4. E-box and BRRE in the promoter regions of regulated genes in *mtbri1* mutants**

| <b>Gene ID</b>  | <b># of E-box</b> | <b>Position to ATG</b> | <b>Annotation</b>               | <b># of BRRE</b> | <b>Position to ATG</b> |
|-----------------|-------------------|------------------------|---------------------------------|------------------|------------------------|
| Medtr3g084150.1 | 4                 | 2 bp                   | Auxin responsive SAUR protein   | 0                |                        |
| Medtr3g084170.1 | 5                 | 2 bp                   | Auxin responsive SAUR protein   | 0                |                        |
| Medtr3g084180.1 | 7                 | 2 bp                   | Auxin responsive SAUR protein   | 0                |                        |
| Medtr3g084190.1 | 6                 | 150bp                  | Auxin-induced SAUR protein 6B   | 0                |                        |
| Medtr3g084200.1 | 6                 | 30bp                   | Auxin responsive SAUR protein   | 0                |                        |
| Medtr3g084220.1 | 4                 | 33bp                   | Auxin responsive SAUR protein   | 0                |                        |
| Medtr3g084230.1 | 4                 | 200bp                  | Auxin responsive SAUR protein   | 0                |                        |
| Medtr3g084240.1 | 5                 | 32 bp                  | Auxin responsive SAUR protein   | 0                |                        |
| Medtr3g084250.1 | 6                 | 140bp                  | Auxin-induced SAUR protein 6B   | 0                |                        |
| Medtr3g110035.1 | 7                 | 130                    | Auxin-induced SAUR protein 6B   | 0                |                        |
| Medtr4g072240.1 | 4                 | 195                    | Auxin-induced SAUR protein 6B   | 0                |                        |
| Medtr4g072270.1 | 7                 | 167 bp                 | Auxin-induced SAUR protein 6B   | 0                |                        |
| Medtr4g072300.1 | 2                 | 198 bp                 | Auxin-induced SAUR protein 6B   | 0                |                        |
| Medtr4g072310.1 | 2                 | 499bp                  | Auxin responsive SAUR protein   | 0                |                        |
| Medtr4g072380.1 | 4                 | 217bp                  | Auxin-induced SAUR protein 6B   | 0                |                        |
| Medtr4g072490.1 | 8                 | 46 bp                  | Auxin-induced SAUR protein X10A | 0                |                        |
| Medtr4g072500.1 | 5                 | 210 bp                 | Auxin-induced SAUR protein X10A | 0                |                        |
| Medtr4g072530.1 | 8                 | 210 bp                 | Auxin-induced SAUR protein 6B   | 0                |                        |
| Medtr4g072580.1 | 5                 | 235                    | Auxin-induced SAUR protein X10A | 0                |                        |
| Medtr4g072600.1 | 5                 | 100 bp                 | Auxin responsive SAUR protein   | 0                |                        |
| Medtr4g072620.1 | 8                 | 204 bp                 | Auxin-induced SAUR 1            | 0                |                        |
| Medtr4g072640.1 | 6                 | 209 bp                 | Auxin-induced SAUR protein 6B   | 0                |                        |
| Medtr4g072650.1 | 4                 | 221 bp                 | Auxin-induced SAUR protein X10A | 0                |                        |
| Medtr4g072660.1 | 3                 | 126 bp                 | Auxin responsive SAUR protein   | 0                |                        |
| Medtr4g072670.1 | 9                 | 73 bp                  | Auxin responsive SAUR protein   | 0                |                        |
| Medtr4g072680.1 | 9                 | 211 bp                 | Auxin-induced SAUR protein 6B   | 0                |                        |
| Medtr4g072720.1 | 11                | 79 bp                  | Auxin-induced SAUR protein X10A | 0                |                        |
| Medtr4g072730.1 | 11                | 39 bp                  | Auxin-induced SAUR protein 6B   | 0                |                        |

|                 |    |         |                                       |   |        |
|-----------------|----|---------|---------------------------------------|---|--------|
| Medtr4g072820.1 | 6  | 237 bp  | Auxin-induced SAUR protein X10A       | 0 |        |
| Medtr4g072830.1 | 5  | 222 bp  | Auxin-induced SAUR protein X10A       | 0 |        |
| Medtr4g072850.1 | 2  | 267 bp  | Auxin responsive SAUR protein         | 0 |        |
| Medtr4g072860.1 | 2  | 227 bp  | Auxin responsive SAUR protein         | 0 |        |
| Medtr4g072890.1 | 4  | 169 bp  | Auxin-induced SAUR protein 6B         | 0 |        |
| Medtr4g072980.1 | 4  | 207 bp  | Auxin-induced SAUR protein X10A       | 0 |        |
| Medtr8g461400.1 | 5  | 2bp     | Auxin responsive SAUR protein         | 0 |        |
| Medtr5g016320.1 | 0  |         | IAA synthetase GH3.3                  | 0 |        |
| Medtr4g133620.1 | 0  |         | ferric reductase transmembrane        | 0 |        |
| Medtr7g021850.1 | 3  | 590 bp  | Auxin-induced protein, aldo reductase | 0 |        |
| Medtr3g095420.1 | 4  | 575 bp  | Auxin-induced protein 5NG4            | 0 |        |
| Medtr1g014090.1 | 10 | 119 bp  | Auxin-induced protein 5NG4            | 0 |        |
| Medtr2g007960.1 | 3  | 1008 bp | Auxin-induced protein 5NG4            | 0 |        |
| Medtr6g036450.1 | 4  | 169 bp  | Auxin-induced protein 5NG4            | 0 |        |
| Medtr5g082520.1 | 2  | 721 bp  | MTCPD                                 | 1 | 184 bp |
| Medtr5g020020.1 | 4  | 115 bp  | MtDWF4                                | 0 |        |
| Medtr7g066760.1 | 3  | 553 bp  | MTDET2                                | 0 |        |
| Medtr6g043740.1 | 2  | 10 bp   | MtDET2-1                              | 0 |        |
| Medtr4g113650.1 | 3  | 298     | MtBAS1                                | 0 |        |
| Medtr6g015910.1 | 6  | 52 bp   | Mt BR6ox1                             | 0 |        |
| Medtr3g007320.1 | 2  | 360 bp  | Mt BR6ox2                             | 0 |        |
| Medtr3g111680.1 | 4  | 420 bp  | MtBZR1                                | 0 |        |
| Medtr5g019550.1 | 2  | 380     | MtBZR2                                | 0 |        |
| Medtr5g098970.1 | 0  |         | MtBSK1                                | 0 |        |
| Medtr7g083500.1 | 2  | 181     | MtCDG1                                | 0 |        |
| Medtr8g062430.1 | 3  | 0 bp    | MtPP2A                                | 0 |        |
| Medtr2g016490.1 | 1  | 256     | MtBIN2                                | 0 |        |
| Medtr1g089270.1 | 3  | 60 bp   | MtBSU1                                | 0 |        |
| Medtr7g102550.1 | 4  | 720     | EF transcription factor 12            | 0 |        |
| Medtr7g020980.1 | 3  | 361     | EF transcription factor               | 0 |        |
| Medtr1g043350.1 | 1  | 403     | EF transcription factor 2             | 0 |        |
| Medtr1g087920.1 | 1  | 550bp   | EF transcription factor 2b            | 0 |        |

|                 |   |        |                                     |   |
|-----------------|---|--------|-------------------------------------|---|
| Medtr4g127930.1 | 2 | 630 bp | AP2-like EF transcription factor    | 0 |
| Medtr4g100380.1 | 7 | 71 bp  | EF transcription factor 1A          | 0 |
| Medtr3g117420.1 | 1 | 345 bp | Ethylene-forming-enzyme dioxygenase | 0 |
| Medtr4g114570.1 | 3 | 89     | EF transcription factor WIN1        | 0 |
| Medtr5g078220.1 | 7 | 56 bp  | GASA5-like protein                  | 0 |
| Medtr8g076940.1 | 2 | 250    | Abscisic acid 8prime-hydroxylase    | 0 |
| Medtr4g106860.1 | 5 | 45     | Gibberellin regulated protein       | 0 |
| Medtr2g070870.1 | 1 | 996    | gibberellin 2-oxidase               | 0 |

## Supplementary Table S5. Primers used in this study

| Primer Name  | Sequence (5' to 3')                     |
|--------------|-----------------------------------------|
| MtBRI1-F     | GAGAGTGTACATGGCATGTGAG                  |
| MtBRI1-F1    | ACAACAGCTGTGTCCATCCATCCA                |
| MtBRI1-R     | TTCTTGCCACCCTAATGCTTGGT                 |
| MtBRI1-R1    | ACCATCTCAACGGCGTTGAAACCT                |
| MtBRI1PB1    | AAAAAGCAGGCTATGAAACCCTTGTATAGCACAAAC    |
| MtBRI1PB2    | AGAAAGCTGGGTCATGCTTGGTTAATTCAGGGACTTC   |
| MtSERK1PB1   | AAAAAGCAGGCTTCATGGAGGAGACAAAGTTCTGTGCTT |
| MtSERK1PB2   | AGAAAGCTGGGTCTCTTGGACCAGATAATTCGACTGCA  |
| MtBRI1-RT-F  | CTCATCATTCACCCATCTTTCCA                 |
| MtBRI1-RT-F1 | TGGCGCGTGTACTTCGTTGAC                   |
| MtBRI1-RT-R  | TATCGAGGTACTGTAGAGATGAA                 |
| MtBRI1-RT-R1 | ACTCCGGTGGTATTGTTCCCTGTGA               |
| MtBR6ox1-F   | CAATGATGGCTGTGAAATACCTC                 |
| MtBR6ox1-R   | GGCCAATCTAGATGTCTCAAAAAT                |
| MtBR6ox2-F   | TTAAGCAATTGGGATGACA                     |
| MtBR6ox2-R   | GCCAGGAAGGTTAATAGGTAGAGA                |
| MtCPD-F      | ACCGGGTTTTACTAATGGAGGAAG                |
| MtCPD-R      | GGAGTGGTAAGGGAAGGGTAAAAA                |
| MtDET2-F     | AACCGCACATAATCTACCCTCTT                 |
| MtDET2-R     | ACAACCCAAAAACACCATCCAT                  |
| MtDWF4-F     | TACTTGGGAAATGGTCTATGTT                  |
| MtDWF4-R     | TGAGCTGCAAATGTGGTT                      |
| MtBAS1-F     | TCCGACGGGCTAAAACAGATG                   |
| MtBAS1-R     | CCAAGGCCAAAAGGTATGAATG                  |
| MtBZR1-RF    | AGGGGATCAAGGGCAGAAACAC                  |
| MtBZR1-RR    | AGACGGGCTCGGGAATGAA                     |
| MtBZR2-RF    | GCCACCCCTTTTCGCTACC                     |
| MtBZR2-RR    | GCACCATGGGCAGTTGTTGTCT                  |
| MtBRI1-RF    | TAACAGGCTTGGTGGTGAGATTCC                |
| MtBRI1-RR    | TCCGGTGGTATTGTTCCCTGTGAGT               |
| MtABA-D1F    | ACACGTGGACCCTTGATGATT                   |
| MtABA-D1R    | ATTCTTAGGCCGTTTATGTCTCTG                |
| MtABA-U1F    | GACCTGGCACCATCAAAAAG                    |
| MtABA-U1R    | CATCAGAGCCAGCCACAATAC                   |
| MtABA-U2F    | TTGCAGGCACATCATCTAAAACAC                |
| MtABA-U2R    | GATGACGGCGGAGCAACACTGGT                 |
| MtAuxin-D1F  | GAATGGGTTAGCCTTGTC                      |
| MtAuxin-D1R  | ACGCACTATACTTAATTTTCATCC                |
| MtAuxin-D2F  | GGAAGTCCCAAAAGGCTATT                    |
| MtAuxin-D2R  | ATTGTAAGACCACCCATTTGAT                  |
| MtAuxin-D3F  | CAAAAGGCTATCTCGCAGTCT                   |

|             |                                |
|-------------|--------------------------------|
| MtAuxin-D3R | ATCATATCCAAATTCTTCTTC          |
| MtAuxin-D4F | TGAACCAAGCCGAGGAAC             |
| MtAuxin-D4R | GGAGGAAGACTGTAATGGAAAAG        |
| MtAuxin-D5F | ATGGGTTTCCGCATAGCA             |
| MtAuxin-D5R | GAATCACGAACCGCCTCAT            |
| MtAuxin-D6F | CGTGAGGCGAAAGAACC              |
| MtAuxin-D6R | AAAGCTCCCAATAAATAACATAAT       |
| MtAuxin-D7F | TGGCTGGTGCACCTTACTTG           |
| MtAuxin-D7R | AATCACCATCCTTGTCTTCATA         |
| MtAuxin-U1F | GTTTTGGGTGGGATTGTGC            |
| MtAuxin-U1R | CATTGCGGTGGTTTGGTG             |
| MtAuxin-U2F | GTGACAGAACCGGAAAGGAAC          |
| MtAuxin-U2R | AAAGTACGCAGTCTAACCACAATC       |
| MtCK-U1F    | CAAAAACCTCTAGAGGCAAAACAG       |
| MtCK-U1R    | GGAATGGCTAAATAGTAAAGAACC       |
| MtEth-U1F   | AGAGGCTAAAGAGAAAGAGGAGTA       |
| MtEth-U1R   | ATTTGTGGGTTATTATGATTGGTA       |
| MtEth-U2F   | GGGGTTGGCACACTCGTT             |
| MtEth-U2R   | GCACTAAAAGCAGAAGCCCACT         |
| MtEth-D1F   | TGCTGAAATTTTAAACCACAAC         |
| MtEth-D1R   | TACCCGGCCTTATAGAAAATGAA        |
| MtGA-D1F    | ACCCCTTTTCTCCCATTCTTCTAA       |
| MtGA-D1R    | CTAATCACACCCCCACCAAACTT        |
| MtGA-U1F    | GTGCGAGACGGAAACAGAAG           |
| MtGA-U1R    | AAGCTCCACAAAACCTCCCTATTAC      |
| MtGA-U2F    | GTCAATACAAATAAGGGGATACAA       |
| MtGA-U2R    | AGCAAAAGGGGAATAAACACTA         |
| Tnt1-Fw     | ACAGTGCTACCTCCTCTGGATG         |
| Tnt1-F1     | TCCTTGTTGGATTGGTAGCCAACCTTGTTG |
| Tnt1-Re     | CAGTGAACGAGCAGAACCTGTG         |
| Tnt1-R1     | TGTAGCACCGAGATACGGTAATTAACAAGA |
| MtACT2-F    | TCAATGTGCCTGCCATGTATGT         |
| MtACT2-R    | ACTCACACCGTCACCAGAATCC         |



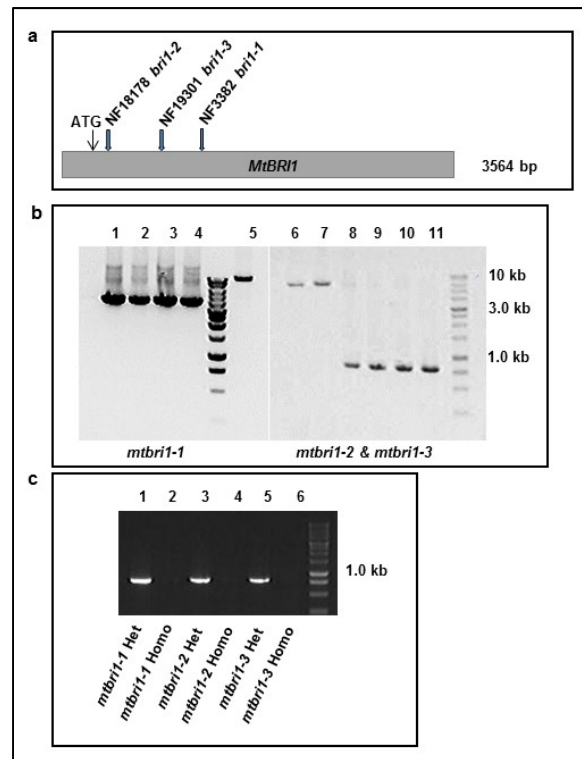

**Supplementary Figure S1.** Identification of *mtbri1* mutants. (a) Schematic *MtBRI1* gene showing *Tnt1* insertion sites of *mtbri1-1*, *mtbri1-2* and *mtbri1-3*. (b) Genotyping of three insertion mutant lines. Left panel shows genotypes of *mtbri1-1* with MtBRI-F and MtBRI-R primers. Lanes 1-4 are wild-type or heterozygous plants and lane 5 is a homozygous plant for the *Tnt1* insertion; right panel shows genotypes of *mtbri1-2* and *mtbri1-3* with MtBRI-RT-F and MtBRI-RT-R primers. Lanes 6-7 are homozygous plants and lanes 8-11 are wild-type or heterozygous plants. (c) RT-PCR analysis with MtBRI-RF and MtBRI-RR primer pairs spanning *Tnt1* insertions in *mtbri1-1* (lanes 1-2), *mtbri1-2* (lanes 3-4), and *mtbri1-3* (lanes 5-6). Lanes 1, 3, and 5 are heterozygous (Het); lanes 2, 4, and 6 are homozygous (Homo).

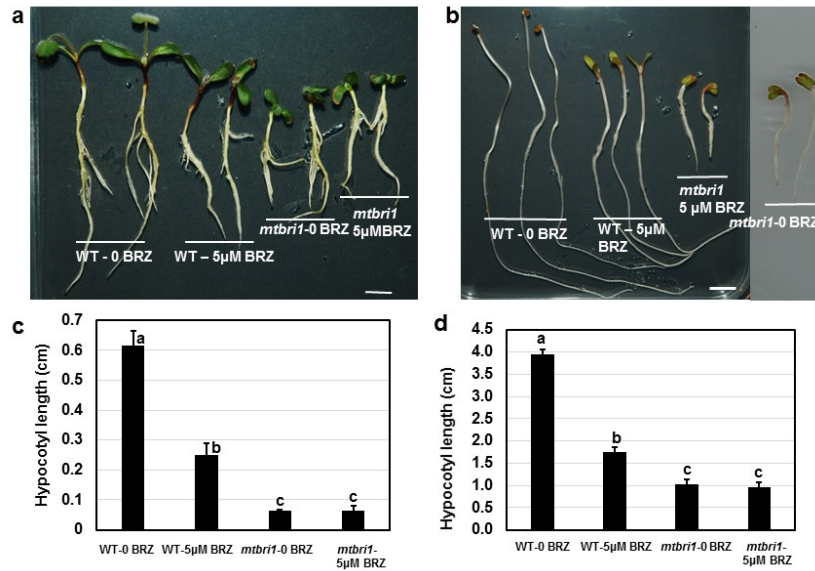

**Figure S2.** Effects of brassinazole on the elongation of hypocotyls of wild-type and *mtbri1* seedlings under light and dark conditions. (a) Germinated seeds were grown on  $\frac{1}{2}$  MS media supplemented with or without 5  $\mu$ M BRZ for 5 days in light; (b) *mtbri1-1* and wildtype seedlings were grown on  $\frac{1}{2}$  MS media supplemented with or without 5  $\mu$ M BRZ for 5 days in the dark. (c) Measurement of hypocotyl length of seedlings in (a). Error bars represent the standard error of the means ( $n \geq 20$ ). Means with different letters are significantly different ( $P < 0.005$ ; Tukey's test). (d) Measurement of hypocotyl length of seedlings in (b). Error bars represent the standard error of the means ( $n \geq 15$ ). Means with different letters are significantly different ( $P < 0.005$ ; Tukey's test). Scale bars: 10 mm.

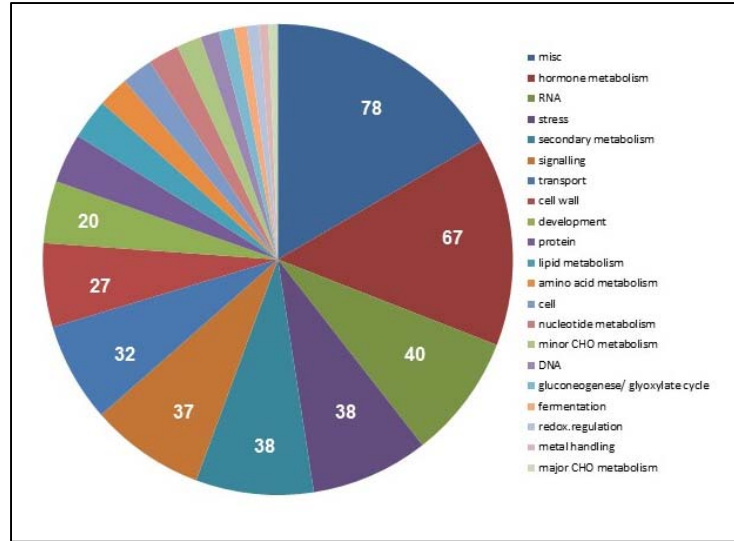

**Supplementary Figure S3.** Overview of functional classification of the 903 differentially expressed genes (fold change  $\geq 2$  for up-regulated genes or  $\leq 0.5$  for down-regulated genes,  $P \leq 0.05$ ) from the microarray analysis by MapMan 3.5. 446 of the genes are classified as unknown function and are not displayed.

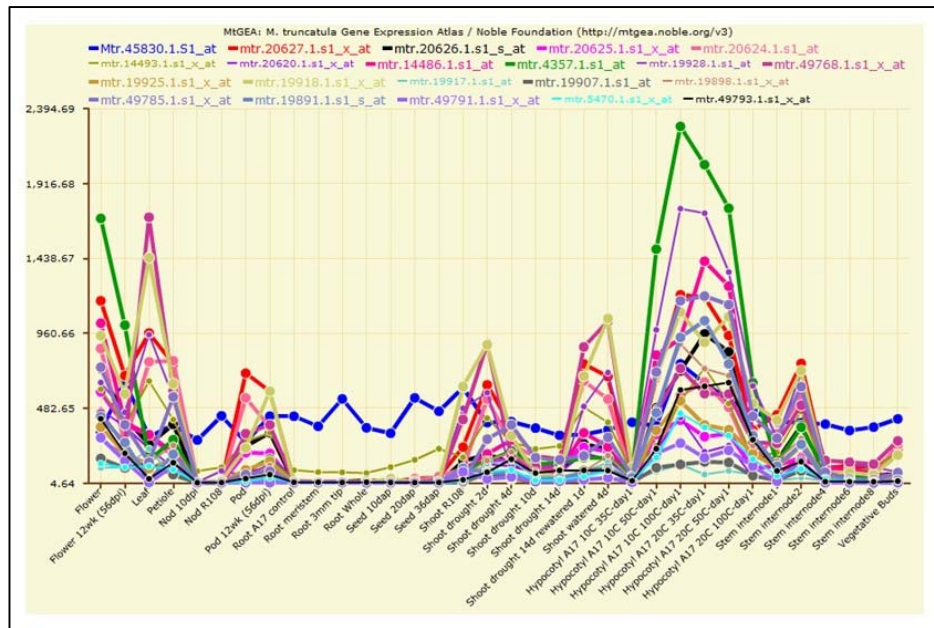

**Supplementary Figure S4.** SAUR gene expression patterns from the Medicago Gene Expression Atlas. Twenty one probe sets corresponding to 21 SAUR genes exhibit similar expression patterns in different tissues and in response to drought stress.

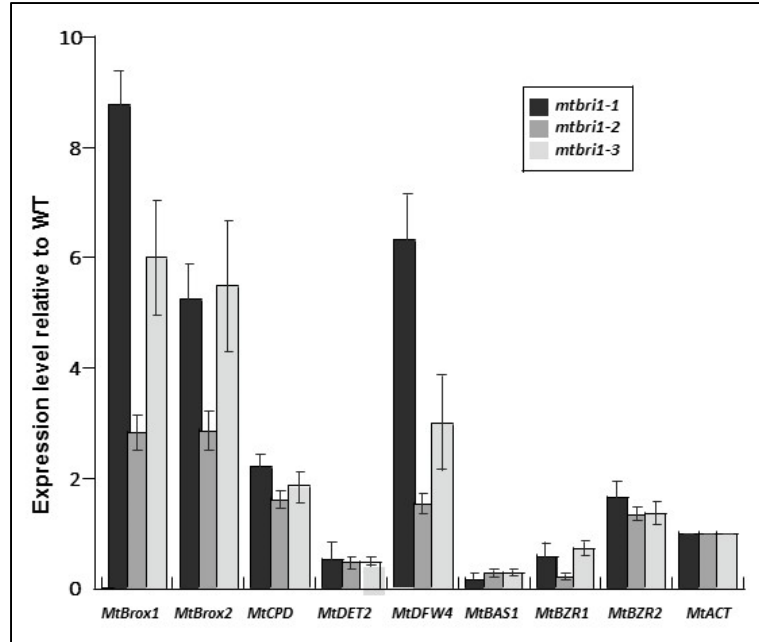

**Supplementary Figure S5.** qRT-PCR expression analysis of genes in BR metabolism and BR signaling pathway in *mtbri1* mutants. *MtACT* was used as the internal control. The values in Y axis show the expression levels of each gene in *mtbri1* mutants relative to the levels in wild type.

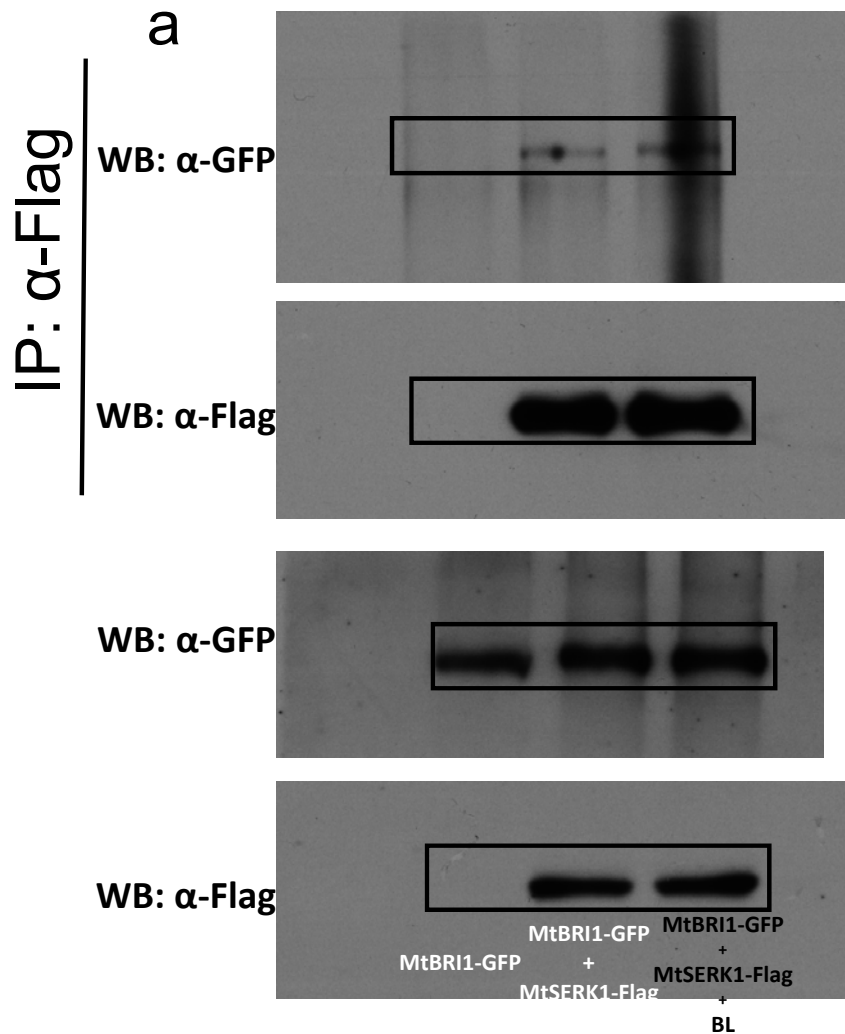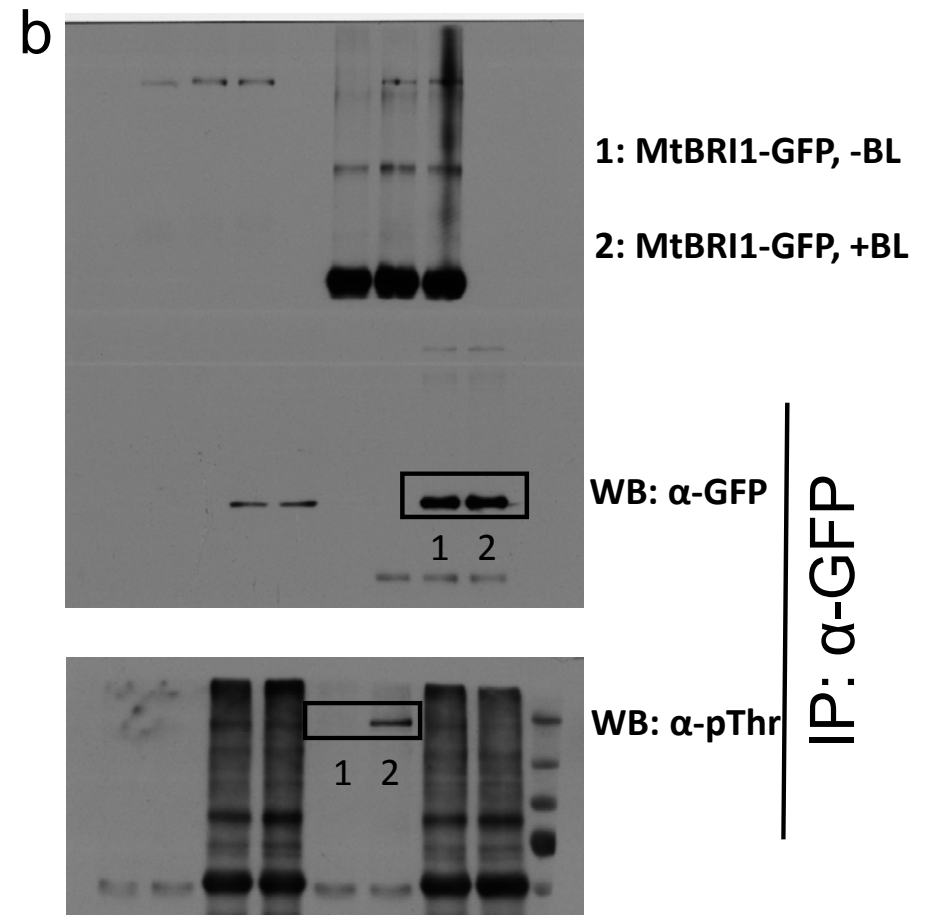

Supplementary Figure S6. Full-length western blots from Figure 5. Lanes used in Figure 5 are outlined with black rectangles.
